# Supplementary material for: Ocular macrophage origin and heterogeneity during steady state and experimental choroidal neovascularization
Source: J Neuroinflammation. 2020 Nov 13;17:341. doi: 10.1186/s12974-020-02010-0 (PMC7666512; doi:10.1186/s12974-020-02010-0)
Supplement: Supplementary file 6 — Additional file 6: Table S1. Top 20 genes for each cluster from full human choroidal sc-RNA-seq data set. Excel file of gene names, cluster, adjusted p-value (p_val_adj), percent of cells expressing gene (pct.1 = current cluster, pct.2 = all other clusters), fold change (avg_logFC = natural log fold change), and raw p-value (p_val). [file 12974_2020_2010_MOESM6_ESM.xlsx]

## Sheet: 20200228 Total markers2
	p_val	avg_logFC	pct.1	pct.2	p_val_adj	cluster	gene
1	0	1.38084	0.687	0.291	0	EC-V1	SELE
2	0	1.13692	0.763	0.324	0	EC-V1	DARC
3	0	0.969969	0.928	0.356	0	EC-V1	MMRN1
4	0	0.891744	0.651	0.339	0	EC-V1	DNASE1L3
5	0	0.882754	0.93	0.443	0	EC-V1	TNFRSF10D
6	0	0.872131	0.78	0.267	0	EC-V1	GPR126
7	0	0.860222	0.87	0.401	0	EC-V1	ICAM4
8	0	0.833573	0.786	0.328	0	EC-V1	SOX7
9	0	0.814453	0.597	0.223	0	EC-V1	CA2
10	0	0.809851	0.932	0.439	0	EC-V1	SLCO2A1
11	0	0.800335	0.923	0.495	0	EC-V1	THBD
12	0	0.794132	0.938	0.473	0	EC-V1	RAMP3
13	0	0.771105	0.877	0.427	0	EC-V1	CALCRL
14	0	0.769835	0.711	0.36	0	EC-V1	VCAM1
15	0	0.751251	0.735	0.281	0	EC-V1	TM4SF18
16	0	0.750452	0.975	0.586	0	EC-V1	ICAM1
17	0	0.750081	0.74	0.324	0	EC-V1	CPE
18	0	0.737635	0.99	0.635	0	EC-V1	VWF
19	0	0.727854	0.756	0.397	0	EC-V1	RND1
20	0	0.723489	0.706	0.366	0	EC-V1	C2CD4B
21	0	1.23988	0.867	0.341	0	EC-A1	IGFBP3
22	0	1.18024	0.858	0.258	0	EC-A1	SEMA3G
23	0	1.12089	0.809	0.293	0	EC-A1	SOX17
24	0	1.1052	0.74	0.199	0	EC-A1	GJA5
25	0	1.06009	0.976	0.466	0	EC-A1	CLDN5
26	0	1.03663	0.679	0.295	0	EC-A1	EDN1
27	0	0.980937	0.732	0.243	0	EC-A1	CCDC3
28	0	0.969768	0.742	0.236	0	EC-A1	HEY1
29	0	0.959116	0.748	0.281	0	EC-A1	GJA4
30	0	0.93835	0.945	0.435	0	EC-A1	PIK3R3
31	0	0.894879	0.775	0.303	0	EC-A1	FBLN2
32	0	0.891046	0.491	0.223	0	EC-A1	KCNJ2
33	0	0.829772	0.678	0.373	0	EC-A1	C2CD4B
34	0	0.79949	0.508	0.207	0	EC-A1	DKK2
35	0	0.797035	0.885	0.42	0	EC-A1	FAM107A
36	0	0.793982	0.944	0.511	0	EC-A1	CLEC14A
37	0	0.78945	0.756	0.376	0	EC-A1	FN1
38	0	0.782497	0.592	0.232	0	EC-A1	ELOVL7
39	0	0.759873	0.847	0.459	0	EC-A1	TNFRSF10D
40	1.95e-177	0.860613	0.514	0.34	3.91e-174	EC-A1	CXCL1
41	0	1.81509	0.999	0.14	0	FB1	FBLN1
42	0	1.76831	0.983	0.182	0	FB1	APOD
43	0	1.67747	0.912	0.137	0	FB1	DCN
44	0	1.67243	0.944	0.136	0	FB1	RARRES1
45	0	1.67007	0.943	0.113	0	FB1	RBP4
46	0	1.58371	0.916	0.117	0	FB1	SFRP4
47	0	1.54248	0.834	0.173	0	FB1	PLA2G2A
48	0	1.5293	0.939	0.155	0	FB1	FAM150B
49	0	1.52141	0.971	0.107	0	FB1	MFAP4
50	0	1.50802	0.978	0.212	0	FB1	IGF2
51	0	1.49897	0.996	0.195	0	FB1	C1S
52	0	1.4908	0.974	0.166	0	FB1	FHL2
53	0	1.4908	1	0.251	0	FB1	IGFBP5
54	0	1.44926	0.953	0.118	0	FB1	PCOLCE
55	0	1.44858	0.953	0.131	0	FB1	LTBP2
56	0	1.44331	0.945	0.076	0	FB1	EDN3
57	0	1.43473	0.961	0.13	0	FB1	SCARA5
58	0	1.43071	0.892	0.084	0	FB1	SMOC2
59	0	1.38213	0.948	0.141	0	FB1	SOD3
60	0	1.37199	0.926	0.098	0	FB1	PTN
61	0	1.43301	0.824	0.392	0	EC-V2	MMRN1
62	0	1.22197	0.6	0.309	0	EC-V2	GPR126
63	0	1.10641	0.719	0.45	0	EC-V2	ITGA6
64	0	1.08184	0.908	0.585	0	EC-V2	EGFL7
65	0	1.07418	0.771	0.478	0	EC-V2	SLCO2A1
66	0	1.07154	0.915	0.659	0	EC-V2	VWF
67	0	1.00749	0.797	0.509	0	EC-V2	RAMP3
68	0	0.991463	0.797	0.504	0	EC-V2	SIX3
69	0	0.8765	0.898	0.681	0	EC-V2	ENG
70	0	0.872658	0.864	0.603	0	EC-V2	PRSS23
71	5.13e-288	0.885875	0.761	0.628	1.03e-284	EC-V2	X7SK.2
72	1.37e-255	1.21985	0.527	0.271	2.73e-252	EC-V2	PKHD1L1
73	7.41e-217	0.986262	0.609	0.398	1.48e-213	EC-V2	KDR
74	2.4e-214	0.906093	0.646	0.443	4.79e-211	EC-V2	GPR116
75	2.15e-194	0.892759	0.631	0.473	4.31e-191	EC-V2	CALCRL
76	2.89e-149	1.0615	0.532	0.368	5.77e-146	EC-V2	DARC
77	1.7e-142	1.0408	0.533	0.383	3.4e-139	EC-V2	PLVAP
78	8.22e-115	1.14371	0.323	0.164	1.64e-111	EC-V2	IHH
79	1.27e-39	0.951145	0.323	0.262	2.54e-36	EC-V2	CYP26B1
80	7.73e-32	1.17747	0.345	0.307	1.55e-28	EC-V2	CA4
81	0	1.5313	0.721	0.38	0	EC-A2	IGFBP3
82	0	1.48028	0.895	0.499	0	EC-A2	CLDN5
83	0	1.15715	0.801	0.613	0	EC-A2	LMO2
84	0	0.824624	0.936	0.763	0	EC-A2	SPARCL1
85	9.66e-298	1.10068	0.731	0.538	1.93e-294	EC-A2	C10orf10
86	3.45e-277	0.884376	0.786	0.595	6.89e-274	EC-A2	IFI27
87	2.58e-210	0.970303	0.684	0.556	5.15e-207	EC-A2	CLEC14A
88	1.06e-147	0.982394	0.592	0.492	2.11e-144	EC-A2	PIK3R3
89	1.78e-145	1.00452	0.612	0.513	3.57e-142	EC-A2	CP
90	4.14e-127	1.00788	0.569	0.472	8.27e-124	EC-A2	FAM107A
91	1.3e-124	0.961378	0.545	0.412	2.59e-121	EC-A2	BGN
92	1.03e-117	1.21241	0.47	0.322	2.07e-114	EC-A2	SEMA3G
93	3.37e-93	1.03493	0.407	0.292	6.73e-90	EC-A2	HEY1
94	5.49e-86	1.09927	0.393	0.257	1.1e-82	EC-A2	GJA5
95	1.79e-78	1.10912	0.439	0.332	3.59e-75	EC-A2	GJA4
96	1.05e-57	1.03587	0.38	0.299	2.09e-54	EC-A2	CCDC3
97	9.56e-39	0.834038	0.392	0.361	1.91e-35	EC-A2	FBLN2
98	4.51e-35	1.03649	0.392	0.356	9.02e-32	EC-A2	SOX17
99	5.24e-17	0.931227	0.338	0.345	1.05e-13	EC-A2	EDN1
100	2.06e-13	0.849823	0.287	0.277	4.12e-10	EC-A2	ELOVL7
101	0	2.76801	0.943	0.217	0	Mac1	C1QB
102	0	2.73349	0.963	0.242	0	Mac1	C1QA
103	0	2.73338	0.939	0.215	0	Mac1	C1QC
104	0	2.51045	0.827	0.188	0	Mac1	F13A1
105	0	2.42588	0.946	0.266	0	Mac1	FCER1G
106	0	2.37374	0.876	0.303	0	Mac1	S100A9
107	0	2.34625	0.844	0.289	0	Mac1	PLTP
108	0	2.29582	0.741	0.143	0	Mac1	VSIG4
109	0	2.28783	0.893	0.225	0	Mac1	AIF1
110	0	2.26641	0.837	0.225	0	Mac1	C1orf162
111	0	2.26602	0.94	0.25	0	Mac1	TYROBP
112	0	2.24736	0.678	0.113	0	Mac1	FOLR2
113	0	2.24216	0.67	0.134	0	Mac1	LYVE1
114	0	2.18595	0.714	0.159	0	Mac1	MS4A4A
115	0	2.10415	0.763	0.222	0	Mac1	FCGR2A
116	0	2.09401	0.707	0.262	0	Mac1	S100A8
117	0	2.08961	0.707	0.216	0	Mac1	CD163
118	0	2.07358	0.701	0.167	0	Mac1	MS4A6A
119	0	1.98609	0.673	0.163	0	Mac1	FCGR3A
120	0	1.98574	0.762	0.273	0	Mac1	CD68
121	0	2.15544	0.839	0.191	0	Pericyte	ACTA2
122	0	2.15238	0.944	0.224	0	Pericyte	RGS5
123	0	1.95361	0.974	0.318	0	Pericyte	TAGLN
124	0	1.78972	0.714	0.105	0	Pericyte	NDUFA4L2
125	0	1.78208	0.979	0.288	0	Pericyte	MAP1B
126	0	1.76701	0.709	0.169	0	Pericyte	STEAP4
127	0	1.75066	0.923	0.287	0	Pericyte	MYL9
128	0	1.61125	0.577	0.12	0	Pericyte	MYH11
129	0	1.53434	0.802	0.186	0	Pericyte	CRISPLD2
130	0	1.5142	0.937	0.373	0	Pericyte	TPM2
131	0	1.46884	0.814	0.178	0	Pericyte	RCAN2
132	0	1.37198	0.726	0.126	0	Pericyte	LMOD1
133	0	1.36924	0.846	0.349	0	Pericyte	MCAM
134	0	1.2768	0.897	0.292	0	Pericyte	IGFBP5
135	0	1.21838	0.731	0.163	0	Pericyte	EFHD1
136	0	1.21408	0.717	0.269	0	Pericyte	ADAMTS4
137	0	1.18994	0.806	0.288	0	Pericyte	GEM
138	0	1.14387	0.69	0.199	0	Pericyte	RRAD
139	4.93e-308	1.64791	0.495	0.132	9.86e-305	Pericyte	CCL19
140	2.56e-298	1.1568	0.682	0.259	5.13e-295	Pericyte	MT1A
141	0	2.0005	0.707	0.03	0	T cell	GZMK
142	0	1.99625	0.953	0.194	0	T cell	CXCR4
143	0	1.92887	0.766	0.18	0	T cell	IL7R
144	0	1.92438	0.796	0.143	0	T cell	CCL5
145	0	1.91875	0.984	0.172	0	T cell	PTPRC
146	0	1.88803	0.877	0.03	0	T cell	CD2
147	0	1.87106	0.824	0.067	0	T cell	CST7
148	0	1.75341	0.817	0.121	0	T cell	CD69
149	0	1.75126	0.783	0.018	0	T cell	CD3D
150	0	1.72095	0.762	0.047	0	T cell	CD3E
151	0	1.64813	0.668	0.024	0	T cell	GZMA
152	0	1.62658	0.809	0.137	0	T cell	RUNX3
153	0	1.60404	0.817	0.099	0	T cell	RHOH
154	0	1.59541	0.628	0.016	0	T cell	CD8A
155	0	1.58544	0.835	0.1	0	T cell	SYTL3
156	0	1.54768	0.851	0.217	0	T cell	ARL4C
157	0	1.51573	0.893	0.322	0	T cell	IL32
158	0	1.50625	0.837	0.146	0	T cell	PTPRCAP
159	0	1.49918	0.717	0.027	0	T cell	SH2D1A
160	0	1.49848	0.946	0.32	0	T cell	DUSP2
161	0	2.22068	0.909	0.114	0	Melanocyte	PMEL
162	0	2.08343	0.869	0.064	0	Melanocyte	MLANA
163	0	2.00866	0.843	0.067	0	Melanocyte	TYRP1
164	0	1.62761	0.719	0.095	0	Melanocyte	CITED1
165	0	1.60036	0.773	0.119	0	Melanocyte	MITF
166	0	1.52269	0.784	0.093	0	Melanocyte	HPGD
167	0	1.50353	0.81	0.227	0	Melanocyte	PLEKHA5
168	0	1.50231	0.76	0.04	0	Melanocyte	MLPH
169	0	1.49514	0.756	0.037	0	Melanocyte	CDH19
170	0	1.44188	0.81	0.179	0	Melanocyte	GPNMB
171	0	1.39169	0.863	0.331	0	Melanocyte	EDNRB
172	0	1.27745	0.736	0.12	0	Melanocyte	FMN1
173	0	1.22934	0.857	0.17	0	Melanocyte	MET
174	1.03e-270	1.68487	0.662	0.03	2.06e-267	Melanocyte	TRPM1
175	1.85e-231	1.31633	0.641	0.059	3.7e-228	Melanocyte	ABCB5
176	1.33e-213	1.24638	0.587	0.009	2.66e-210	Melanocyte	SYNPR
177	9.34e-185	1.47561	0.665	0.078	1.87e-181	Melanocyte	SPP1
178	9.11e-174	1.48439	0.631	0.059	1.82e-170	Melanocyte	DCT
179	1.08e-170	1.18942	0.654	0.076	2.16e-167	Melanocyte	TFAP2A
180	1.42e-95	1.2718	0.56	0.014	2.84e-92	Melanocyte	RP11.93B14.5
181	0	2.23502	0.901	0.178	0	Mac2	EREG
182	0	2.185	0.987	0.352	0	Mac2	IL1B
183	0	2.16279	0.795	0.225	0	Mac2	CCL20
184	0	2.15759	0.926	0.036	0	Mac2	FCN1
185	0	2.15502	0.928	0.235	0	Mac2	G0S2
186	0	2.0965	0.977	0.268	0	Mac2	BCL2A1
187	0	2.07647	0.957	0.237	0	Mac2	LYZ
188	0	2.04694	0.957	0.132	0	Mac2	AQP9
189	0	1.98422	0.965	0.15	0	Mac2	SERPINA1
190	0	1.97357	0.913	0.183	0	Mac2	VCAN
191	0	1.94499	0.913	0.265	0	Mac2	S100A8
192	0	1.93788	0.947	0.17	0	Mac2	NLRP3
193	0	1.89889	0.845	0.174	0	Mac2	TNFAIP6
194	0	1.85774	0.97	0.216	0	Mac2	PLEK
195	0	1.83034	0.962	0.314	0	Mac2	S100A9
196	0	1.82402	0.736	0.093	0	Mac2	IL1RN
197	0	1.82273	0.991	0.41	0	Mac2	PLAUR
198	0	1.8208	0.93	0.319	0	Mac2	CCL4
199	0	1.79475	0.896	0.103	0	Mac2	RP11.701P16.5
200	0	1.7806	0.889	0.131	0	Mac2	RP11.290F20.3
201	8.22e-225	1.09688	0.867	0.601	1.64e-221	EC-V3	IFI27
202	9.73e-169	0.99265	0.81	0.645	1.95e-165	EC-V3	ADIRF
203	7.83e-163	1.00037	0.834	0.676	1.57e-159	EC-V3	TM4SF1
204	5.94e-138	1.14364	0.735	0.529	1.19e-134	EC-V3	RAMP3
205	1.45e-137	1.00741	0.779	0.622	2.91e-134	EC-V3	PRSS23
206	8.92e-94	0.968522	0.669	0.499	1.78e-90	EC-V3	C11orf96
207	1.45e-93	0.949363	0.703	0.611	2.9e-90	EC-V3	ITM2A
208	6.05e-92	0.971471	0.692	0.564	1.21e-88	EC-V3	RGCC
209	1.12e-91	0.984415	0.676	0.509	2.24e-88	EC-V3	PTGDS
210	9.27e-84	0.962065	0.663	0.586	1.85e-80	EC-V3	PDLIM1
211	8.7e-73	0.980299	0.658	0.582	1.74e-69	EC-V3	HYAL2
212	4.86e-68	0.93913	0.662	0.583	9.72e-65	EC-V3	SDPR
213	6.63e-42	1.19097	0.484	0.38	1.33e-38	EC-V3	DARC
214	1.11e-40	1.1968	0.482	0.377	2.22e-37	EC-V3	DNASE1L3
215	2.33e-21	0.914883	0.471	0.444	4.65e-18	EC-V3	RND1
216	3.36e-18	0.938858	0.316	0.272	6.71e-15	EC-V3	CA2
217	3.35e-10	0.880856	0.348	0.342	6.69e-07	EC-V3	TM4SF18
218	7.61e-10	0.842675	0.409	0.412	1.52e-06	EC-V3	C2CD4B
219	9.43e-09	0.954083	0.359	0.343	1.89e-05	EC-V3	SELE
220	8.96e-07	1.10784	0.32	0.31	0.00179241	EC-V3	CA4
221	0	1.74285	0.835	0.206	0	FB2	FBLN1
222	0	1.66934	0.901	0.307	0	FB2	IGFBP5
223	1.65e-289	1.79577	0.811	0.271	3.3e-286	FB2	IGF2
224	2.53e-283	1.85749	0.805	0.244	5.06e-280	FB2	APOD
225	3.81e-262	1.63209	0.691	0.18	7.62e-259	FB2	SFRP4
226	1.55e-251	1.75382	0.738	0.217	3.1e-248	FB2	FAM150B
227	1.26e-249	1.54095	0.639	0.147	2.52e-246	FB2	EDN3
228	2.08e-243	1.63185	0.714	0.198	4.15e-240	FB2	DCN
229	3.9e-240	1.53407	0.864	0.42	7.8e-237	FB2	IGFBP6
230	5.1e-237	1.53555	0.673	0.18	1.02e-233	FB2	RBP4
231	8.66e-219	1.48904	0.768	0.259	1.73e-215	FB2	C1S
232	1.03e-212	1.65059	0.693	0.201	2.06e-209	FB2	RARRES1
233	1.23e-208	1.80768	0.679	0.225	2.45e-205	FB2	PLA2G2A
234	2.52e-205	1.45637	0.621	0.149	5.05e-202	FB2	SMOC2
235	7.57e-170	1.48559	0.627	0.179	1.51e-166	FB2	MFAP4
236	1.83e-169	1.41752	0.667	0.233	3.66e-166	FB2	FHL2
237	3.22e-155	1.41657	0.693	0.266	6.45e-152	FB2	FABP5
238	1.33e-147	1.41592	0.57	0.198	2.66e-144	FB2	CCL26
239	2.21e-81	1.31436	0.478	0.124	4.42e-78	FB2	ADH1B
240	8.65e-64	1.39739	0.498	0.21	1.73e-60	FB2	SLPI
241	0	2.12111	0.981	0.357	0	Mac3	IL1B
242	0	2.00017	0.925	0.28	0	Mac3	CCL3
243	0	1.94907	0.927	0.195	0	Mac3	TNF
244	0	1.90846	0.952	0.225	0	Mac3	GPR183
245	0	1.85162	0.93	0.275	0	Mac3	BCL2A1
246	0	1.77027	0.948	0.222	0	Mac3	PLEK
247	0	1.72414	0.99	0.288	0	Mac3	CD83
248	0	1.71973	0.99	0.415	0	Mac3	PLAUR
249	0	1.71538	0.922	0.177	0	Mac3	NLRP3
250	0	1.62238	0.751	0.102	0	Mac3	IL1A
251	0	1.60129	0.898	0.226	0	Mac3	CD163
252	0	1.58778	0.978	0.233	0	Mac3	FCGR2A
253	0	1.5834	0.748	0.102	0	Mac3	PLAU
254	0	1.58068	0.916	0.244	0	Mac3	LYZ
255	0	1.57627	0.716	0.102	0	Mac3	IL1R2
256	0	1.57122	0.683	0.044	0	Mac3	CCL3L1
257	0	1.56859	0.971	0.205	0	Mac3	MS4A7
258	2.75e-282	1.77577	0.683	0.141	5.5e-279	Mac3	C15orf48
259	1.22e-268	1.54308	0.844	0.326	2.44e-265	Mac3	CCL4
260	4.82e-267	1.56922	0.675	0.19	9.63e-264	Mac3	EREG
261	0	1.01049	0.992	0.821	0	EC	NEAT1
262	0	0.709211	0.998	0.924	0	EC	MALAT1
263	7e-198	1.06639	1	0.915	1.4e-194	EC	MTRNR2L12
264	1.11e-170	1.10372	0.958	0.786	2.22e-167	EC	MTRNR2L8
265	6.86e-169	1.4606	0.868	0.508	1.37e-165	EC	XIST
266	1.59e-145	0.688428	0.918	0.811	3.18e-142	EC	FOSB
267	1.64e-139	1.20416	0.931	0.726	3.28e-136	EC	MTRNR2L2
268	1.55e-75	1.05526	0.806	0.626	3.11e-72	EC	KDM6B
269	2.02e-63	1.05375	0.547	0.29	4.05e-60	EC	CNKSR3
270	1.13e-57	0.864518	0.825	0.721	2.26e-54	EC	IRF1
271	3.53e-47	0.923088	0.657	0.458	7.05e-44	EC	ICAM4
272	7.81e-45	0.695592	0.87	0.775	1.56e-41	EC	SOD2
273	1.49e-37	1.1909	0.509	0.318	2.99e-34	EC	MTRNR2L1
274	1.34e-35	0.925978	0.581	0.51	2.68e-32	EC	KCNQ1OT1
275	1.4e-35	0.695824	0.653	0.504	2.79e-32	EC	TNFRSF10D
276	4.52e-21	0.774843	0.448	0.301	9.03e-18	EC	PDE4C
277	2.83e-14	0.708404	0.615	0.538	5.65e-11	EC	AKAP12
278	1.04e-12	0.644487	0.268	0.461	2.07e-09	EC	ZFYVE16
279	1.83e-09	0.681529	0.52	0.457	3.66e-06	EC	LDLR
280	5.76e-06	0.650214	0.422	0.41	0.0115229	EC	ABL2
281	0	1.84959	0.809	0.04	0	Schw2	SCN7A
282	0	1.83328	0.878	0.016	0	Schw2	NRXN1
283	0	1.83271	0.946	0.043	0	Schw2	CDH19
284	0	1.80388	0.839	0.087	0	Schw2	CHL1
285	0	1.79697	0.826	0.082	0	Schw2	SPP1
286	0	1.74548	0.935	0.112	0	Schw2	LGI4
287	0	1.69158	0.8	0.073	0	Schw2	PLP1
288	0	1.54817	0.761	0.028	0	Schw2	CADM3
289	0	1.51474	0.899	0.262	0	Schw2	GPM6B
290	0	1.4576	0.933	0.209	0	Schw2	FXYD1
291	0	1.44213	0.653	0.024	0	Schw2	MYOT
292	0	1.43185	0.923	0.031	0	Schw2	SFRP5
293	0	1.42771	0.881	0.139	0	Schw2	NRN1
294	3.37e-274	1.32068	0.735	0.078	6.73e-271	Schw2	SERPINA5
295	2.9e-271	1.33982	0.871	0.167	5.79e-268	Schw2	MEG3
296	3.3e-224	1.32179	0.868	0.31	6.59e-221	Schw2	ALDH1A1
297	1.4e-180	1.32681	0.765	0.16	2.8e-177	Schw2	S100B
298	3.12e-154	1.34157	0.661	0.059	6.23e-151	Schw2	AZGP1
299	5.71e-77	1.32926	0.621	0.082	1.14e-73	Schw2	NRXN3
300	1.21e-70	1.34533	0.621	0.072	2.42e-67	Schw2	NCAM1
301	0	2.40549	0.743	0.057	0	NK	GNLY
302	0	2.23743	0.951	0.094	0	NK	NKG7
303	0	2.23367	0.955	0.159	0	NK	CCL5
304	0	2.11795	0.836	0.039	0	NK	GZMB
305	0	1.99085	0.955	0.088	0	NK	CST7
306	0	1.98963	0.909	0.026	0	NK	PRF1
307	0	1.98481	0.828	0.038	0	NK	GZMH
308	0	1.92334	0.976	0.12	0	NK	SYTL3
309	0	1.78704	0.804	0.023	0	NK	KLRB1
310	0	1.75817	0.996	0.197	0	NK	PTPRC
311	0	1.73238	0.838	0.074	0	NK	CD7
312	0	1.72004	0.933	0.155	0	NK	RUNX3
313	0	1.70141	0.947	0.218	0	NK	CXCR4
314	0	1.69873	0.757	0.044	0	NK	CD247
315	0	1.66721	0.751	0.044	0	NK	FGFBP2
316	0	1.66139	0.887	0.105	0	NK	SH2D2A
317	0	1.6413	0.773	0.135	0	NK	KLRD1
318	0	1.61557	0.796	0.027	0	NK	AC092580.4
319	0	1.60662	0.8	0.041	0	NK	GZMA
320	4.92e-304	1.59604	0.895	0.205	9.84e-301	NK	AKNA
321	0	2.224	0.957	0.137	0	RPE	TTR
322	0	1.97494	0.939	0.038	0	RPE	RPE65
323	0	1.71783	0.915	0.017	0	RPE	RGR
324	0	1.54468	0.924	0.041	0	RPE	RLBP1
325	0	1.52111	0.893	0.049	0	RPE	GNGT1
326	1.96e-276	1.89728	0.988	0.198	3.93e-273	RPE	SERPINF1
327	3.03e-268	1.75835	0.97	0.201	6.06e-265	RPE	TFPI2
328	2.58e-267	1.69752	0.939	0.134	5.16e-264	RPE	FRZB
329	5.45e-256	1.46523	0.79	0.045	1.09e-252	RPE	SFRP5
330	4.45e-230	1.62226	0.851	0.103	8.9e-227	RPE	TRPM3
331	1.18e-227	1.83399	0.854	0.073	2.36e-224	RPE	PCP4
332	9.53e-190	1.95672	0.86	0.151	1.91e-186	RPE	BEST1
333	8.35e-173	2.08462	0.838	0.163	1.67e-169	RPE	FHIT
334	2.41e-165	1.8123	0.817	0.09	4.82e-162	RPE	TYRP1
335	1.1e-139	1.65992	0.741	0.048	2.2e-136	RPE	LRAT
336	1.94e-131	1.48437	0.643	0.016	3.88e-128	RPE	SLC39A12
337	4.1e-128	1.63657	0.784	0.139	8.21e-125	RPE	ENPP2
338	5.95e-100	1.97966	0.72	0.149	1.19e-96	RPE	MT1G
339	5.94e-88	1.54919	0.698	0.079	1.19e-84	RPE	PLEKHB1
340	6.46e-80	1.45949	0.707	0.136	1.29e-76	RPE	ITGB8
341	0	2.33056	0.966	0.089	0	B cell 1	LY9
342	0	2.2101	0.945	0.091	0	B cell 1	CD79A
343	0	2.01847	0.886	0.026	0	B cell 1	MS4A1
344	0	1.88709	0.866	0.036	0	B cell 1	BANK1
345	0	1.7918	0.872	0.047	0	B cell 1	TNFRSF13C
346	0	1.64197	0.703	0.023	0	B cell 1	RP5.887A10.1
347	0	1.61067	0.817	0.09	0	B cell 1	LTB
348	0	1.58889	0.676	0.021	0	B cell 1	RASSF6
349	0	1.53201	0.7	0.008	0	B cell 1	TNFRSF13B
350	0	1.38253	0.655	0.019	0	B cell 1	VPREB3
351	1.12e-269	1.76073	0.755	0.108	2.24e-266	B cell 1	CD70
352	4.31e-251	1.89023	0.797	0.145	8.61e-248	B cell 1	CCR7
353	9.99e-246	1.63732	0.893	0.173	2e-242	B cell 1	PTPRCAP
354	1.47e-241	1.54642	0.907	0.168	2.93e-238	B cell 1	CYTIP
355	1.24e-223	2.04139	0.99	0.224	2.48e-220	B cell 1	CXCR4
356	1.02e-215	1.71838	0.941	0.267	2.04e-212	B cell 1	CD37
357	2.15e-211	1.60637	0.776	0.15	4.31e-208	B cell 1	CD69
358	7.47e-180	1.41506	0.91	0.27	1.49e-176	B cell 1	CD52
359	3.21e-160	1.38941	0.897	0.286	6.42e-157	B cell 1	CD48
360	5.12e-143	1.36735	0.828	0.244	1.02e-139	B cell 1	UCP2
361	0	2.48542	0.954	0.094	0	B cell 2	MZB1
362	0	1.98868	0.936	0.065	0	B cell 2	FCRL5
363	0	1.98392	0.927	0.094	0	B cell 2	CD79A
364	0	1.78908	0.918	0.047	0	B cell 2	POU2AF1
365	0	1.73569	0.9	0.07	0	B cell 2	CD27
366	0	1.59189	0.721	0.024	0	B cell 2	JSRP1
367	0	1.53034	0.658	0.023	0	B cell 2	RASSF6
368	0	1.51611	0.758	0.045	0	B cell 2	TNFRSF18
369	0	1.29209	0.58	0.025	0	B cell 2	STAP1
370	8.45e-254	1.45241	0.717	0.082	1.69e-250	B cell 2	IGF1
371	2.37e-233	2.98267	0.95	0.214	4.74e-230	B cell 2	IGJ
372	6.08e-217	1.61612	0.749	0.094	1.22e-213	B cell 2	LY9
373	1.93e-214	1.37313	0.758	0.102	3.87e-211	B cell 2	SLAMF7
374	3.06e-196	1.81622	0.785	0.141	6.12e-193	B cell 2	DERL3
375	6.16e-191	1.61364	0.886	0.182	1.23e-187	B cell 2	RGS1
376	2.59e-184	1.43868	0.913	0.17	5.18e-181	B cell 2	CYTIP
377	2.18e-134	2.17223	0.753	0.21	4.36e-131	B cell 2	IGLL5
378	1.45e-123	1.33626	0.95	0.354	2.89e-120	B cell 2	ISG20
379	2.86e-121	1.83742	0.849	0.256	5.73e-118	B cell 2	ZFAND2A
380	9.5e-72	1.71356	0.584	0.151	1.9e-68	B cell 2	HSPA6
381	0	2.52332	0.815	0.017	0	Retina	CNGA1
382	0	2.5074	0.79	0.004	0	Retina	RP1
383	0	2.49105	0.741	0.002	0	Retina	RTBDN
384	0	2.42965	0.79	0.025	0	Retina	GUCA1A
385	6.6e-306	2.58988	0.778	0.027	1.32e-302	Retina	GNAT1
386	4.93e-285	2.97694	0.877	0.041	9.86e-282	Retina	RHO
387	9.7e-273	2.86984	0.951	0.054	1.94e-269	Retina	AIPL1
388	8.32e-199	2.87988	0.877	0.059	1.66e-195	Retina	GNGT1
389	2.82e-160	2.34339	0.802	0.066	5.64e-157	Retina	SYT1
390	1.8e-139	3.01391	0.864	0.069	3.6e-136	Retina	RCVRN
391	1.72e-126	2.90253	0.877	0.103	3.43e-123	Retina	SAG
392	2.83e-121	3.03358	0.877	0.056	5.66e-118	Retina	PDE6G
393	1.57e-113	2.35031	0.79	0.086	3.14e-110	Retina	TULP1
394	8.95e-107	2.34157	0.815	0.096	1.79e-103	Retina	CRX
395	3.04e-105	2.67018	0.84	0.112	6.08e-102	Retina	PDE6A
396	1.78e-100	2.91003	0.877	0.107	3.57e-97	Retina	NRL
397	2.94e-80	2.3801	0.79	0.091	5.87e-77	Retina	PRCD
398	1.33e-73	2.6909	0.914	0.204	2.67e-70	Retina	ROM1
399	1.67e-66	2.40924	0.79	0.148	3.34e-63	Retina	RP11.395G23.3
400	7.6e-66	2.43036	0.926	0.22	1.52e-62	Retina	UNC119
401	1.15e-189	2.51644	0.981	0.046	2.31e-186	Schw1	BCAS1
402	6.19e-176	2.27561	0.83	0.023	1.24e-172	Schw1	PMP2
403	6.13e-174	2.896	0.981	0.039	1.23e-170	Schw1	MT3
404	1.64e-164	2.07914	0.868	0.022	3.29e-161	Schw1	MLIP
405	1.01e-110	1.92037	0.868	0.038	2.02e-107	Schw1	GJC3
406	3.33e-106	2.03767	0.868	0.056	6.66e-103	Schw1	GLDN
407	1.82e-93	1.75275	0.849	0.037	3.64e-90	Schw1	MIA
408	2.33e-88	2.25553	0.887	0.08	4.67e-85	Schw1	KIF19
409	1.7e-80	2.8	0.981	0.085	3.4e-77	Schw1	MPZ
410	2.97e-73	2.18753	0.906	0.092	5.95e-70	Schw1	PLP1
411	3.12e-72	2.02517	0.887	0.054	6.25e-69	Schw1	SFRP5
412	5.49e-55	2.4183	0.943	0.175	1.1e-51	Schw1	S100B
413	4.27e-47	1.67634	0.925	0.17	8.53e-44	Schw1	LPL
414	7.73e-46	2.36899	0.981	0.317	1.55e-42	Schw1	MBP
415	2.81e-44	1.6876	0.943	0.228	5.63e-41	Schw1	FXYD1
416	6.11e-44	1.76147	1	0.311	1.22e-40	Schw1	CRYAB
417	1.33e-42	1.67648	0.83	0.087	2.66e-39	Schw1	PLEKHB1
418	9.71e-36	1.77841	0.906	0.279	1.94e-32	Schw1	GPM6B
419	2.04e-34	1.80272	0.887	0.31	4.08e-31	Schw1	PLLP
420	1.2e-10	1.64346	0.642	0.102	2.4e-07	Schw1	CAPS
