# Supplementary material for: Ocular macrophage origin and heterogeneity during steady state and experimental choroidal neovascularization
Source: J Neuroinflammation. 2020 Nov 13;17:341. doi: 10.1186/s12974-020-02010-0 (PMC7666512; doi:10.1186/s12974-020-02010-0)
Supplement: Supplementary file 8 — Additional file 8: Table S3. Number and percentage of cells from each patient that contributed to each leukocyte cluster. Number of cells, ratio of cells, phenotype of patient, and enrichment of sample from each human donor. [file 12974_2020_2010_MOESM8_ESM.xlsx]

## Sheet: identityCD45subset2
Cells
Enrichment	None	None	None	CD31	CD31	CD31	CD31	None	None	None	CD31	CD31	CD31	CD31
Phenotype	NL	Drusen	nAMD	nAMD	NL	Drusen	NL	NL	Drusen	nAMD	nAMD	NL	Drusen	NL
Donor	macula_1	macula_2	macula_3	macula_4	macula_5	macula_6	macula_7	peripheral_1	peripheral_2	peripheral_3	peripheral_4	peripheral_5	peripheral_6	peripheral_7	Total
Mac-A	18	15	13	64	47	8	369	10	6	19	22	61	22	622	1296
CTL	166	60	82	192	19	8	46	19	65	65	76	19	2	141	960
Mac-C	34	2	3	160	10	2	150	5	2	4	21	12	12	322	739
NK	170	26	19	130	2	4	7	21	24	16	31	10	4	11	475
Mac-D	22	5	11	62	32	5	57	20	13	4	22	52	10	143	458
B1	28	41	6	30	4	9	19	6	19	3	11	1	2	113	292
B2	0	2	0	32	3	1	55	2	0	1	3	2	2	118	221
Mac-E	8	0	2	162	0	0	0	4	2	3	18	1	3	4	207
T	20	7	19	14	4	3	6	1	8	5	12	5	2	32	138
Mast	0	1	0	0	0	0	0	33	4	17	1	5	4	0	65
Mac-B	0	0	0	22	1	1	9	0	0	0	0	0	0	26	59
Ratio of Cells
Donor	macula_1	macula_2	macula_3	macula_4	macula_5	macula_6	macula_7	peripheral_1	peripheral_2	peripheral_3	peripheral_4	peripheral_5	peripheral_6	peripheral_7
Mac-A	0.0138889	0.0115741	0.0100309	0.0493827	0.0362654	0.00617284	0.284722	0.00771605	0.00462963	0.0146605	0.0169753	0.0470679	0.0169753	0.479938
CTL	0.172917	0.0625	0.0854167	0.2	0.0197917	0.00833333	0.0479167	0.0197917	0.0677083	0.0677083	0.0791667	0.0197917	0.00208333	0.146875
Mac-C	0.0460081	0.00270636	0.00405954	0.216509	0.0135318	0.00270636	0.202977	0.0067659	0.00270636	0.00541272	0.0284168	0.0162382	0.0162382	0.435724
NK	0.357895	0.0547368	0.04	0.273684	0.00421053	0.00842105	0.0147368	0.0442105	0.0505263	0.0336842	0.0652632	0.0210526	0.00842105	0.0231579
Mac-D	0.0480349	0.010917	0.0240175	0.135371	0.069869	0.010917	0.124454	0.0436681	0.0283843	0.00873362	0.0480349	0.113537	0.0218341	0.312227
B1	0.0958904	0.140411	0.0205479	0.10274	0.0136986	0.0308219	0.0650685	0.0205479	0.0650685	0.010274	0.0376712	0.00342466	0.00684932	0.386986
B2	0	0.00904977	0	0.144796	0.0135747	0.00452489	0.248869	0.00904977	0	0.00452489	0.0135747	0.00904977	0.00904977	0.533937
Mac-E	0.0386473	0	0.00966184	0.782609	0	0	0	0.0193237	0.00966184	0.0144928	0.0869565	0.00483092	0.0144928	0.0193237
T	0.144928	0.0507246	0.137681	0.101449	0.0289855	0.0217391	0.0434783	0.00724638	0.057971	0.0362319	0.0869565	0.0362319	0.0144928	0.231884
Mast	0	0.0153846	0	0	0	0	0	0.507692	0.0615385	0.261538	0.0153846	0.0769231	0.0615385	0
Mac-B	0	0	0	0.372881	0.0169492	0.0169492	0.152542	0	0	0	0	0	0	0.440678
