# Supplementary material for: Ocular macrophage origin and heterogeneity during steady state and experimental choroidal neovascularization
Source: J Neuroinflammation. 2020 Nov 13;17:341. doi: 10.1186/s12974-020-02010-0 (PMC7666512; doi:10.1186/s12974-020-02010-0)
Supplement: Supplementary file 9 — Additional file 9: Table S4. List of differentially expressed genes between macrophage subtypes. Excel file of gene names, cluster, adjusted p-value (p_val_adj), percent of cells expressing gene (pct.1 = current cluster, pct.2 = all other clusters), fold change (avg_logFC = natural log fold change), and raw p-value (p_val). [file 12974_2020_2010_MOESM9_ESM.xlsx]

## Sheet: MacSubset.Markers
	p_val	avg_logFC	pct.1	pct.2	p_val_adj	cluster	gene
1	0	1.78217	0.887	0.372	0	Mac-A	RNASE1
2	0	1.35299	0.931	0.479	0	Mac-A	C1QC
3	0	1.33166	0.948	0.525	0	Mac-A	C1QB
4	0	1.2126	0.951	0.597	0	Mac-A	C1QA
5	0	0.718953	0.94	0.945	0	Mac-A	GPX1
6	0	-1.18546	0.039	0.831	0	Mac-A	CHD2
7	0	-1.18815	0.071	0.916	0	Mac-A	CCNL1
8	0	-1.26629	0.422	0.992	0	Mac-A	MALAT1
9	0	-1.30239	0.032	0.817	0	Mac-A	FLNA
10	0	-1.32118	0.029	0.823	0	Mac-A	ATP13A3
11	0	-1.3309	0.063	0.931	0	Mac-A	WSB1
12	0	-1.33291	0.029	0.807	0	Mac-A	FNIP2
13	0	-1.36677	0.033	0.854	0	Mac-A	PLK3
14	0	-1.36795	0.09	0.935	0	Mac-A	TNFAIP2
15	0	-1.40458	0.073	0.902	0	Mac-A	SERPINB9
16	0	-1.42417	0.066	0.918	0	Mac-A	NFKB1
17	0	-1.43355	0.071	0.897	0	Mac-A	ICAM1
18	0	-1.4373	0.096	0.95	0	Mac-A	REL
19	0	-1.442	0.057	0.878	0	Mac-A	ATP2B1
20	0	-1.54456	0.069	0.942	0	Mac-A	CFLAR
21	0	-1.57336	0.027	0.829	0	Mac-A	CCRL2
22	0	-1.58022	0.015	0.814	0	Mac-A	LINC00936
23	0	-1.63088	0.035	0.847	0	Mac-A	NLRP3
24	0	-1.76161	0.032	0.934	0	Mac-A	KDM6B
25	0	-1.943	0.09	0.978	0	Mac-A	NEAT1
26	8.60786e-305	-1.11497	0.037	0.812	2.81804e-300	Mac-A	C1orf63
27	2.95337e-302	-1.26683	0.044	0.815	9.66875e-298	Mac-A	EHD1
28	4.44071e-301	-1.19579	0.046	0.826	1.4538e-296	Mac-A	SPAG9
29	3.47025e-300	-1.1741	0.037	0.801	1.13609e-295	Mac-A	ZNF267
30	3.99777e-300	-1.09936	0.027	0.781	1.30879e-295	Mac-A	NFKB2
31	1.45997e-297	-1.45411	0.111	0.913	4.77966e-293	Mac-A	BCL2A1
32	3.75749e-297	-1.14182	0.023	0.766	1.23013e-292	Mac-A	PPP1R15B
33	4.31947e-297	-1.11892	0.068	0.868	1.41411e-292	Mac-A	PNPLA8
34	7.05959e-297	-1.22788	0.042	0.808	2.31117e-292	Mac-A	MAFF
35	9.71292e-297	-1.1824	0.039	0.803	3.17982e-292	Mac-A	BACH1
36	1.46929e-296	-1.10936	0.042	0.81	4.81015e-292	Mac-A	JMJD1C
37	1.50394e-296	-1.42487	0.008	0.723	4.9236e-292	Mac-A	MIR29A
38	3.809e-296	-1.48195	0.024	0.763	1.24699e-291	Mac-A	BIRC3
39	8.89016e-296	-1.31903	0.009	0.727	2.91046e-291	Mac-A	ITGAX
40	2.32791e-294	-1.33687	0.036	0.794	7.62112e-290	Mac-A	CD48
41	4.16569e-292	-1.26563	0.047	0.813	1.36376e-287	Mac-A	STX11
42	1.66745e-290	1.20042	0.895	0.776	5.45891e-286	Mac-A	TUBA1B
43	1.95732e-290	-1.20989	0.023	0.754	6.40789e-286	Mac-A	ARL5B
44	2.18345e-290	-1.09154	0.028	0.768	7.14818e-286	Mac-A	CSRNP1
45	6.9119e-290	-1.41358	0.037	0.777	2.26282e-285	Mac-A	GK
46	3.4737e-288	-1.07635	0.027	0.761	1.13722e-283	Mac-A	MIR22HG
47	6.97735e-287	-1.28472	0.104	0.911	2.28424e-282	Mac-A	TNFAIP3
48	1.60149e-286	-1.1358	0.039	0.786	5.24295e-282	Mac-A	RASGEF1B
49	2.72793e-285	-1.28688	0.091	0.885	8.9307e-281	Mac-A	PIM3
50	9.03193e-283	0.743508	0.92	0.925	2.95687e-278	Mac-A	IFITM3
51	1.10502e-282	-1.20877	0.043	0.787	3.61763e-278	Mac-A	FGR
52	2.61912e-281	-1.11041	0.07	0.848	8.57446e-277	Mac-A	KYNU
53	8.40134e-280	-1.11026	0.084	0.877	2.75043e-275	Mac-A	NR4A1
54	1.15494e-279	-1.18933	0.077	0.854	3.78105e-275	Mac-A	INSIG1
55	1.21067e-278	-1.88325	0.022	0.718	3.96349e-274	Mac-A	EREG
56	7.79881e-278	-0.977536	0.076	0.857	2.55317e-273	Mac-A	MAP2K3
57	1.08958e-276	1.68546	0.825	0.306	3.56707e-272	Mac-A	PLTP
58	5.33892e-276	-1.09102	0.056	0.809	1.74786e-271	Mac-A	RIPK2
59	1.73915e-273	-1.11616	0.067	0.83	5.69362e-269	Mac-A	LCP2
60	1.09437e-270	-1.03911	0.075	0.846	3.58275e-266	Mac-A	GBP2
61	1.53354e-270	-1.22291	0.023	0.718	5.0205e-266	Mac-A	GCH1
62	3.17231e-270	-1.26989	0.027	0.727	1.03855e-265	Mac-A	NR4A3
63	7.6274e-270	-1.19536	0.018	0.703	2.49706e-265	Mac-A	MYO1G
64	1.32557e-269	-1.10483	0.016	0.698	4.33966e-265	Mac-A	MAFG
65	1.40116e-269	-0.943758	0.072	0.838	4.58712e-265	Mac-A	FAM133B
66	1.78286e-268	-1.78477	0.042	0.742	5.83673e-264	Mac-A	G0S2
67	3.57136e-268	-1.11374	0.04	0.756	1.16919e-263	Mac-A	NUMB
68	3.66534e-266	-1.12125	0.112	0.897	1.19996e-261	Mac-A	WTAP
69	9.33155e-266	-1.00131	0.079	0.845	3.05496e-261	Mac-A	BAZ1A
70	3.40273e-265	-0.954998	0.035	0.742	1.11399e-260	Mac-A	CYTH1
71	1.42552e-263	-1.31511	0.029	0.717	4.66687e-259	Mac-A	TREM1
72	2.92114e-263	-1.05248	0.029	0.72	9.56324e-259	Mac-A	ADAM17
73	9.90077e-262	-0.953053	0.056	0.783	3.24132e-257	Mac-A	GLS
74	2.16267e-261	-1.05004	0.113	0.904	7.08013e-257	Mac-A	TNFRSF1B
75	3.08995e-261	-1.13698	0.077	0.823	1.01159e-256	Mac-A	SLC2A3
76	3.46159e-261	-1.04203	0.046	0.759	1.13326e-256	Mac-A	SLC38A2
77	3.78894e-260	-1.37616	0.002	0.643	1.24042e-255	Mac-A	LUCAT1
78	4.77347e-259	-1.18852	0.014	0.672	1.56274e-254	Mac-A	NFAT5
79	8.01921e-259	1.72928	0.785	0.237	2.62533e-254	Mac-A	SEPP1
80	1.25269e-258	-1.13577	0.014	0.675	4.10107e-254	Mac-A	PHACTR1
81	2.25057e-258	-1.16053	0.033	0.722	7.36791e-254	Mac-A	GPCPD1
82	2.4641e-258	-0.970938	0.066	0.802	8.06697e-254	Mac-A	KMT2E
83	4.86545e-258	-1.00309	0.049	0.764	1.59285e-253	Mac-A	ANKRD12
84	9.78839e-258	-1.27076	0.036	0.725	3.20452e-253	Mac-A	ABL2
85	1.8829e-257	-1.14269	0.005	0.65	6.16424e-253	Mac-A	RP11.138A9.1
86	3.44382e-257	-0.982112	0.073	0.816	1.12744e-252	Mac-A	NABP1
87	3.92394e-257	-1.1064	0.018	0.681	1.28462e-252	Mac-A	IL6R
88	2.23069e-255	-0.970412	0.033	0.72	7.30284e-251	Mac-A	ARHGEF2
89	1.06851e-254	-0.958863	0.051	0.761	3.4981e-250	Mac-A	CHD1
90	5.74254e-254	-1.054	0.123	0.909	1.87999e-249	Mac-A	PTPRC
91	9.36523e-253	-1.0178	0.018	0.675	3.06599e-248	Mac-A	ERN1
92	3.36503e-252	-1.05084	0.033	0.714	1.10164e-247	Mac-A	THAP2
93	6.43304e-252	-0.939622	0.019	0.674	2.10605e-247	Mac-A	SMG1
94	8.01701e-252	-0.949592	0.083	0.828	2.62461e-247	Mac-A	TANK
95	1.10075e-251	-0.858267	0.058	0.775	3.60363e-247	Mac-A	GPBP1
96	2.87751e-251	-1.28313	0.033	0.702	9.42038e-247	Mac-A	DUSP6
97	4.65816e-251	-1.69368	0.013	0.653	1.52499e-246	Mac-A	VCAN
98	7.33248e-251	-0.868355	0.039	0.727	2.40051e-246	Mac-A	MYO9B
99	1.25279e-250	-1.12889	0.127	0.892	4.10138e-246	Mac-A	ZEB2
100	9.41631e-250	-0.934126	0.021	0.677	3.08271e-245	Mac-A	PSEN1
101	4.62993e-249	-1.10874	0.029	0.694	1.51575e-244	Mac-A	SLC25A37
102	9.47001e-249	-1.02016	0.022	0.676	3.10029e-244	Mac-A	ZC3H12A
103	1.27362e-248	-1.11293	0.052	0.748	4.16956e-244	Mac-A	LILRB2
104	2.19229e-248	-1.19807	0.011	0.648	7.17711e-244	Mac-A	NFKBID
105	8.08989e-248	-1.09553	0.298	0.966	2.64847e-243	Mac-A	PLAUR
106	6.91846e-247	-1.21327	0.007	0.635	2.26497e-242	Mac-A	TRAF1
107	2.04181e-246	-1.03743	0.103	0.859	6.68448e-242	Mac-A	PDE4B
108	4.88932e-246	-1.02879	0.014	0.652	1.60066e-241	Mac-A	TET2
109	6.06919e-246	-0.982627	0.116	0.882	1.98693e-241	Mac-A	VMP1
110	1.84486e-244	-1.12784	0.175	0.94	6.03972e-240	Mac-A	CD55
111	9.44449e-243	-0.925629	0.055	0.748	3.09194e-238	Mac-A	PPP1R10
112	3.54029e-242	-1.3908	0.019	0.654	1.15902e-237	Mac-A	PTGS2
113	4.79938e-242	-0.965227	0.021	0.662	1.57122e-237	Mac-A	MAPK6
114	1.88637e-241	-0.872834	0.078	0.802	6.17559e-237	Mac-A	AHNAK
115	2.23921e-241	-0.843918	0.063	0.769	7.33072e-237	Mac-A	IL10RA
116	4.91935e-241	-0.885438	0.029	0.684	1.6105e-236	Mac-A	CSGALNACT2
117	1.74407e-240	-0.87341	0.076	0.794	5.70974e-236	Mac-A	IRAK3
118	1.77248e-240	-0.991565	0.025	0.669	5.80274e-236	Mac-A	SIPA1L1
119	2.5029e-240	-0.951325	0.03	0.685	8.194e-236	Mac-A	LSP1
120	6.16185e-240	-1.01507	0.097	0.834	2.01727e-235	Mac-A	LIMS1
121	9.39692e-240	-1.17001	0.013	0.638	3.07636e-235	Mac-A	CFP
122	9.56426e-238	-1.5495	0.021	0.649	3.13115e-233	Mac-A	CD52
123	1.50172e-237	-1.56863	0.009	0.619	4.91632e-233	Mac-A	AQP9
124	1.51314e-237	-0.829739	0.051	0.73	4.95372e-233	Mac-A	CLK1
125	6.86679e-237	-0.977672	0.073	0.774	2.24805e-232	Mac-A	IFI30
126	2.8758e-236	-0.83444	0.048	0.721	9.41479e-232	Mac-A	AFF4
127	2.89009e-236	-0.934717	0.031	0.677	9.46159e-232	Mac-A	SLC7A5
128	8.38382e-236	-0.869182	0.13	0.905	2.74469e-231	Mac-A	FOSL2
129	1.73666e-235	-0.847393	0.12	0.887	5.68546e-231	Mac-A	IQGAP1
130	4.40131e-235	-0.969666	0.084	0.796	1.4409e-230	Mac-A	MYADM
131	8.13976e-235	-1.08144	0.132	0.889	2.6648e-230	Mac-A	NFKBIZ
132	4.57335e-234	-0.952976	0.032	0.677	1.49722e-229	Mac-A	LPCAT1
133	7.13898e-234	-0.843947	0.042	0.699	2.33716e-229	Mac-A	STK10
134	1.59697e-232	-0.893812	0.042	0.694	5.22816e-228	Mac-A	RYBP
135	4.16232e-232	-1.16071	0.011	0.618	1.36266e-227	Mac-A	CDC42EP3
136	5.82376e-230	-0.848709	0.117	0.868	1.90658e-225	Mac-A	AKAP13
137	1.43928e-229	-1.03417	0.032	0.665	4.7119e-225	Mac-A	NRIP1
138	3.97865e-229	-0.81066	0.139	0.918	1.30253e-224	Mac-A	PRRC2C
139	8.03975e-229	-1.45379	0.011	0.61	2.63205e-224	Mac-A	OLR1
140	2.08451e-228	-1.08664	0.003	0.589	6.82426e-224	Mac-A	RP11.138A9.2
141	9.14902e-228	-1.00299	0.015	0.619	2.99521e-223	Mac-A	NBPF10
142	1.10611e-227	-1.18381	0.228	0.897	3.62119e-223	Mac-A	IL1B
143	4.60277e-227	-0.808716	0.049	0.705	1.50685e-222	Mac-A	PNISR
144	4.96703e-227	-0.976914	0.03	0.657	1.62611e-222	Mac-A	CD97
145	5.29131e-227	-0.842293	0.058	0.728	1.73227e-222	Mac-A	BHLHE40
146	8.78697e-227	-0.895184	0.029	0.655	2.87668e-222	Mac-A	TIPARP
147	4.69986e-225	1.43189	0.803	0.436	1.53864e-220	Mac-A	F13A1
148	1.21187e-224	-0.898515	0.062	0.728	3.96743e-220	Mac-A	PTPN1
149	2.07018e-224	-0.826827	0.058	0.722	6.77737e-220	Mac-A	NUFIP2
150	7.71018e-224	-0.695435	0.067	0.746	2.52416e-219	Mac-A	FMNL1
151	2.99551e-223	-0.987972	0.024	0.634	9.80671e-219	Mac-A	SLC43A2
152	9.39904e-223	-0.808321	0.103	0.823	3.07706e-218	Mac-A	MIDN
153	3.81737e-222	-0.766863	0.05	0.701	1.24973e-217	Mac-A	JOSD1
154	1.91712e-221	-1.17167	0.022	0.623	6.27625e-217	Mac-A	ABCA1
155	1.10595e-220	-0.812661	0.032	0.651	3.62067e-216	Mac-A	EPC1
156	1.63045e-220	-0.932207	0.018	0.612	5.33776e-216	Mac-A	LPXN
157	6.06413e-220	-0.948609	0.084	0.767	1.98528e-215	Mac-A	FAM107B
158	1.24469e-219	-0.890359	0.042	0.675	4.07488e-215	Mac-A	ANKRD11
159	1.40648e-219	-1.26778	0.014	0.599	4.60452e-215	Mac-A	CD300E
160	2.32801e-219	-0.737854	0.056	0.711	7.62145e-215	Mac-A	TRA2A
161	6.14046e-219	-0.754691	0.047	0.688	2.01026e-214	Mac-A	CPEB4
162	1.37438e-218	-0.957462	0.092	0.78	4.49943e-214	Mac-A	MXD1
163	1.64386e-218	-0.981156	0.015	0.604	5.38168e-214	Mac-A	CSF3R
164	8.3338e-217	-0.920445	0.151	0.902	2.72832e-212	Mac-A	MAP3K8
165	1.35202e-216	-0.819912	0.147	0.901	4.42625e-212	Mac-A	MGAT1
166	1.45374e-216	-0.920853	0.021	0.614	4.75927e-212	Mac-A	SETD5.AS1
167	2.79635e-216	-0.854648	0.1	0.8	9.15468e-212	Mac-A	RNF144B
168	2.829e-216	-0.863559	0.116	0.83	9.26158e-212	Mac-A	EZR
169	4.07474e-216	-1.04193	0.009	0.581	1.33399e-211	Mac-A	RNF19B
170	4.74651e-216	-0.856507	0.089	0.776	1.55391e-211	Mac-A	IER5
171	5.7023e-216	-1.11781	0.025	0.622	1.86682e-211	Mac-A	LDLR
172	9.11606e-215	-0.990958	0.015	0.594	2.98442e-210	Mac-A	B3GNT5
173	1.23433e-214	-0.813209	0.029	0.631	4.04094e-210	Mac-A	POLR2A
174	1.68355e-214	-1.22123	0.001	0.556	5.51161e-210	Mac-A	SLC2A6
175	2.48868e-213	-0.891068	0.075	0.738	8.14745e-209	Mac-A	CHMP1B
176	9.57162e-213	-0.896355	0.134	0.865	3.13356e-208	Mac-A	RILPL2
177	1.42386e-212	-0.990445	0.051	0.679	4.66143e-208	Mac-A	OTUD1
178	2.6931e-212	-1.08559	0.003	0.558	8.81669e-208	Mac-A	RP6.99M1.2
179	1.39886e-211	-0.767137	0.129	0.865	4.57959e-207	Mac-A	ZFAND5
180	1.8702e-211	-0.844255	0.174	0.938	6.12267e-207	Mac-A	LRRFIP1
181	2.37803e-211	-0.931707	0.018	0.594	7.78519e-207	Mac-A	MCTP1
182	2.45106e-211	-0.883707	0.032	0.632	8.02429e-207	Mac-A	HEXIM1
183	3.82157e-211	-1.02605	0.08	0.737	1.25111e-206	Mac-A	TNFAIP8
184	7.15082e-210	-0.791387	0.116	0.824	2.34103e-205	Mac-A	TAOK3
185	1.34714e-208	-0.967494	0.025	0.607	4.41027e-204	Mac-A	EMR2
186	1.3596e-208	-0.726103	0.029	0.62	4.45105e-204	Mac-A	RELB
187	1.89196e-208	-0.838198	0.164	0.913	6.19389e-204	Mac-A	DDX3X
188	5.01974e-208	-1.01155	0.008	0.563	1.64336e-203	Mac-A	SDC4
189	8.65037e-208	-1.07732	0.075	0.714	2.83196e-203	Mac-A	RP11.701P16.5
190	9.82472e-208	-0.856648	0.128	0.846	3.21642e-203	Mac-A	PFKFB3
191	2.026e-207	-0.840102	0.025	0.606	6.63272e-203	Mac-A	PURB
192	2.47368e-207	-0.820761	0.042	0.649	8.09832e-203	Mac-A	ARL4A
193	3.60665e-207	-0.818654	0.034	0.627	1.18075e-202	Mac-A	SERPINB8
194	2.77515e-206	-0.828236	0.032	0.623	9.08529e-202	Mac-A	ARID4B
195	4.11723e-206	-1.01853	0.016	0.58	1.3479e-201	Mac-A	REV3L
196	1.11605e-205	-0.79372	0.049	0.664	3.65372e-201	Mac-A	SKIL
197	3.79304e-205	-0.722122	0.044	0.652	1.24177e-200	Mac-A	C9orf72
198	1.38975e-204	-0.788709	0.042	0.645	4.54976e-200	Mac-A	CCDC88A
199	2.14159e-204	-1.05986	0.034	0.621	7.01115e-200	Mac-A	PHLDA1
200	9.29056e-204	-0.897549	0.183	0.93	3.04154e-199	Mac-A	KLF6
201	9.80463e-204	-0.946806	0.009	0.558	3.20984e-199	Mac-A	ZBTB43
202	1.05932e-203	-0.746152	0.086	0.749	3.46799e-199	Mac-A	RBM47
203	4.02393e-203	-0.766157	0.037	0.63	1.31735e-198	Mac-A	HBP1
204	5.93486e-203	-0.92934	0.046	0.648	1.94295e-198	Mac-A	SESTD1
205	1.04503e-202	-1.5993	0.006	0.546	3.42124e-198	Mac-A	FCN1
206	1.358e-202	-0.791645	0.042	0.64	4.44581e-198	Mac-A	CYLD
207	5.57523e-202	-0.902986	0.004	0.54	1.82522e-197	Mac-A	IRAK2
208	1.29608e-201	-0.792387	0.039	0.627	4.24312e-197	Mac-A	TNIP1
209	1.64245e-201	-0.959676	0.031	0.606	5.37705e-197	Mac-A	MAP4K4
210	6.14433e-201	-0.891468	0.017	0.573	2.01153e-196	Mac-A	B4GALT5
211	1.13136e-200	-0.872636	0.186	0.936	3.70385e-196	Mac-A	NFE2L2
212	1.48276e-200	-0.824009	0.026	0.597	4.85427e-196	Mac-A	DENND5A
213	1.74027e-200	-0.801295	0.032	0.609	5.6973e-196	Mac-A	SNN
214	1.25021e-198	-0.921689	0.008	0.543	4.09294e-194	Mac-A	ANKLE2
215	4.35463e-198	-1.08521	0.093	0.729	1.42562e-193	Mac-A	TNF
216	9.90501e-198	-0.816594	0.021	0.576	3.2427e-193	Mac-A	JARID2
217	1.38862e-197	-0.81258	0.033	0.608	4.54606e-193	Mac-A	TLE4
218	1.44708e-196	-0.762418	0.034	0.609	4.73745e-192	Mac-A	OXSR1
219	1.75054e-196	-0.749105	0.051	0.65	5.73091e-192	Mac-A	FOXO3
220	6.54421e-196	-0.836861	0.032	0.601	2.14244e-191	Mac-A	ZFYVE16
221	1.06574e-194	-1.15273	0.002	0.52	3.48903e-190	Mac-A	KB.1507C5.4
222	2.41526e-194	-0.923128	0.03	0.592	7.90708e-190	Mac-A	DUSP5
223	1.5224e-193	-0.814173	0.03	0.591	4.98404e-189	Mac-A	ZBTB7A
224	1.56022e-193	-0.857455	0.082	0.714	5.10785e-189	Mac-A	SGK1
225	6.56145e-193	-0.707768	0.041	0.62	2.14809e-188	Mac-A	MAP3K2
226	5.16694e-192	-1.40443	0.022	0.563	1.69155e-187	Mac-A	C15orf48
227	5.42918e-192	-0.886909	0.025	0.573	1.77741e-187	Mac-A	GPR132
228	9.44936e-192	-0.92724	0.014	0.545	3.09353e-187	Mac-A	RBBP8
229	1.0977e-191	-0.754201	0.174	0.917	3.59365e-187	Mac-A	PTPRE
230	1.28557e-191	-0.856103	0.006	0.525	4.2087e-187	Mac-A	LINC.PINT
231	1.35222e-191	-1.01562	0.052	0.636	4.4269e-187	Mac-A	GRASP
232	2.83647e-191	-0.755616	0.019	0.558	9.28605e-187	Mac-A	ZFC3H1
233	6.37098e-191	-0.780996	0.168	0.892	2.08573e-186	Mac-A	CDKN1A
234	6.54374e-191	-1.00291	0.006	0.524	2.14229e-186	Mac-A	CRIP1
235	1.10917e-190	-0.693565	0.041	0.614	3.63119e-186	Mac-A	STAG2
236	3.21723e-190	-0.726777	0.062	0.664	1.05326e-185	Mac-A	FGD4
237	8.10684e-190	-0.874725	0.004	0.514	2.65402e-185	Mac-A	HIVEP1
238	2.18512e-189	-0.711034	0.049	0.632	7.15364e-185	Mac-A	PHF20L1
239	2.05183e-188	-0.834618	0.054	0.64	6.71729e-184	Mac-A	IGSF6
240	6.37229e-188	-0.918543	0.029	0.577	2.08616e-183	Mac-A	PAG1
241	2.9186e-187	-0.76413	0.039	0.602	9.55492e-183	Mac-A	TRIB1
242	3.60747e-187	-0.820547	0.034	0.588	1.18101e-182	Mac-A	ISG20
243	1.56817e-186	-0.708484	0.038	0.597	5.13388e-182	Mac-A	CD58
244	4.01607e-186	-0.75032	0.033	0.584	1.31478e-181	Mac-A	SMCHD1
245	1.27019e-185	-0.86071	0.012	0.528	4.15834e-181	Mac-A	ETV3
246	2.17172e-185	-0.817745	0.007	0.514	7.10976e-181	Mac-A	TNFRSF10B
247	2.37407e-185	-0.8	0.027	0.566	7.77223e-181	Mac-A	MACF1
248	5.527e-185	-0.801334	0.023	0.555	1.80943e-180	Mac-A	ZBTB1
249	1.73595e-184	-1.5667	0.017	0.53	5.68315e-180	Mac-A	TNFAIP6
250	5.32225e-184	-0.990676	0.11	0.739	1.7424e-179	Mac-A	BASP1
251	5.46015e-184	-0.821266	0.015	0.534	1.78754e-179	Mac-A	ITGA5
252	2.16536e-183	-0.79329	0.212	0.947	7.08896e-179	Mac-A	SRSF5
253	2.59384e-183	-1.19871	0.03	0.567	8.49172e-179	Mac-A	IL1A
254	3.21497e-182	-0.748531	0.043	0.603	1.05252e-177	Mac-A	AHR
255	3.70405e-182	-0.721795	0.066	0.656	1.21263e-177	Mac-A	PDE4DIP
256	4.57695e-182	-0.711758	0.062	0.645	1.4984e-177	Mac-A	KLF10
257	1.50673e-181	-1.00881	0.012	0.519	4.93273e-177	Mac-A	RAPGEF2
258	5.71978e-181	-0.788042	0.015	0.528	1.87254e-176	Mac-A	RELT
259	6.322e-181	-0.979162	0.242	0.906	2.06969e-176	Mac-A	IL8
260	6.84417e-181	-0.918486	0.004	0.496	2.24064e-176	Mac-A	MIR24.2
261	5.452e-180	0.698344	0.823	0.923	1.78488e-175	Mac-A	NPC2
262	9.09593e-180	-0.884864	0.258	0.94	2.97783e-175	Mac-A	PLEK
263	2.15744e-178	-0.868058	0.072	0.653	7.06302e-174	Mac-A	RP11.1143G9.4
264	9.78556e-178	-0.735303	0.037	0.577	3.2036e-173	Mac-A	NDRG1
265	1.50311e-177	-0.76835	0.053	0.614	4.92087e-173	Mac-A	RAPGEF1
266	3.3652e-177	-0.81115	0.012	0.509	1.1017e-172	Mac-A	LFNG
267	1.24296e-176	-0.905333	0.001	0.478	4.0692e-172	Mac-A	SNORD3B.2
268	1.81659e-176	-0.704272	0.045	0.594	5.94715e-172	Mac-A	AMICA1
269	2.00396e-176	-0.784828	0.012	0.509	6.56056e-172	Mac-A	TP53BP2
270	2.05564e-176	-1.2121	0.043	0.58	6.72974e-172	Mac-A	IL1RN
271	2.76546e-176	-0.781253	0.008	0.498	9.05357e-172	Mac-A	SIK3
272	8.4416e-176	-0.854169	0.214	0.948	2.76361e-171	Mac-A	CD83
273	3.17182e-175	-0.895655	0.005	0.488	1.03839e-170	Mac-A	CYB5D1
274	5.25526e-175	-0.694886	0.059	0.624	1.72047e-170	Mac-A	NBN
275	7.24332e-175	-0.808516	0.019	0.524	2.37132e-170	Mac-A	AKAP9
276	1.37534e-174	-0.83108	0.015	0.513	4.5026e-170	Mac-A	TSC22D2
277	5.9965e-173	-0.697843	0.056	0.612	1.96313e-168	Mac-A	MBP
278	1.94822e-172	-0.73918	0.022	0.524	6.37807e-168	Mac-A	GPATCH2L
279	2.15827e-172	-0.700224	0.037	0.565	7.06574e-168	Mac-A	RBBP6
280	5.32031e-172	-0.776667	0.046	0.586	1.74176e-167	Mac-A	PELI1
281	5.45755e-172	-0.826579	0.025	0.534	1.78669e-167	Mac-A	MARCKSL1
282	5.68265e-172	-0.71406	0.022	0.527	1.86039e-167	Mac-A	PRKAG2
283	1.5015e-171	-0.723354	0.12	0.751	4.9156e-167	Mac-A	PPIF
284	3.34554e-171	-0.776118	0.052	0.601	1.09526e-166	Mac-A	LTA4H
285	4.71421e-171	-0.742457	0.111	0.733	1.54334e-166	Mac-A	UBE2D1
286	7.01761e-171	-0.929891	0.059	0.605	2.29742e-166	Mac-A	LILRA5
287	8.134e-171	-0.895935	0.014	0.5	2.66291e-166	Mac-A	DMXL2
288	9.08924e-171	-0.95105	0.011	0.493	2.97563e-166	Mac-A	KMO
289	5.70982e-170	-0.781098	0.022	0.519	1.86928e-165	Mac-A	INTS6
290	1.15841e-169	-0.704312	0.016	0.505	3.79239e-165	Mac-A	C16orf72
291	1.39365e-169	0.725114	0.81	0.906	4.56252e-165	Mac-A	C1orf162
292	1.99448e-168	-0.734963	0.461	0.988	6.52954e-164	Mac-A	SOD2
293	3.14664e-168	-1.12298	0.013	0.494	1.03015e-163	Mac-A	HES4
294	9.35417e-168	-0.769988	0.029	0.531	3.06237e-163	Mac-A	NXF1
295	2.14336e-167	-0.711539	0.02	0.509	7.01694e-163	Mac-A	SLC6A6
296	1.29702e-166	-0.697839	0.03	0.535	4.24617e-162	Mac-A	IRF7
297	2.21776e-166	-0.715994	0.022	0.515	7.26051e-162	Mac-A	PCF11
298	2.30762e-166	-0.78313	0.029	0.528	7.5547e-162	Mac-A	RALGDS
299	3.50177e-166	-0.751704	0.034	0.543	1.14641e-161	Mac-A	N4BP1
300	3.88292e-166	-0.818742	0.246	0.954	1.27119e-161	Mac-A	FOSB
301	8.06182e-166	-1.20469	0.012	0.485	2.63928e-161	Mac-A	MIR155HG
302	1.87562e-165	-0.731567	0.065	0.615	6.14041e-161	Mac-A	PMAIP1
303	1.27465e-164	-1.13292	0.003	0.459	4.17296e-160	Mac-A	LINC00910
304	2.36568e-164	-0.942632	0.059	0.594	7.74477e-160	Mac-A	VEGFA
305	6.11829e-164	-0.847824	0.004	0.459	2.00301e-159	Mac-A	KIAA0907
306	1.09617e-163	-0.722746	0.015	0.49	3.58865e-159	Mac-A	NOTCH2
307	1.29316e-163	-0.74474	0.058	0.593	4.23355e-159	Mac-A	WARS
308	5.53045e-163	-0.796984	0.048	0.57	1.81056e-158	Mac-A	GBP1
309	1.06921e-162	-0.764799	0.008	0.47	3.50038e-158	Mac-A	CLEC12A
310	1.09911e-162	-0.805861	0.263	0.966	3.59828e-158	Mac-A	MCL1
311	1.65102e-162	-0.846092	0.009	0.471	5.40512e-158	Mac-A	MLTK
312	5.33996e-162	-0.736787	0.243	0.947	1.7482e-157	Mac-A	SQSTM1
313	2.89189e-161	-0.695839	0.134	0.757	9.46746e-157	Mac-A	NR4A2
314	2.93743e-160	-0.939233	0.008	0.463	9.61657e-156	Mac-A	ICAM4
315	1.88601e-159	-1.02068	0.011	0.468	6.17443e-155	Mac-A	KCNQ1OT1
316	4.15963e-159	-0.859113	0.063	0.592	1.36178e-154	Mac-A	RGCC
317	6.74092e-159	-0.738204	0.022	0.498	2.20684e-154	Mac-A	RB1CC1
318	9.25012e-159	-0.717548	0.017	0.483	3.02831e-154	Mac-A	MALT1
319	1.26717e-158	-0.706302	0.022	0.495	4.14846e-154	Mac-A	ZCCHC6
320	4.65838e-158	-0.731958	0.193	0.871	1.52506e-153	Mac-A	DUSP2
321	1.16054e-156	-0.706342	0.033	0.52	3.79938e-152	Mac-A	SAV1
322	9.10228e-156	-0.72658	0.217	0.916	2.97991e-151	Mac-A	SOCS3
323	5.97427e-155	-0.884478	0.055	0.561	1.95586e-150	Mac-A	DNAJA4
324	5.84337e-154	-0.740525	0.093	0.647	1.913e-149	Mac-A	PHLDA2
325	9.42313e-154	-1.0309	0.008	0.449	3.08494e-149	Mac-A	PLAC8
326	2.50817e-153	1.53234	0.644	0.286	8.21125e-149	Mac-A	FOLR2
327	5.71377e-153	-0.714215	0.009	0.45	1.87057e-148	Mac-A	DOT1L
328	1.67579e-152	-0.776015	0.268	0.975	5.48619e-148	Mac-A	PPP1R15A
329	3.35671e-152	-0.886541	0.207	0.811	1.09892e-147	Mac-A	CCL4
330	6.42657e-152	-0.854246	0.063	0.576	2.10393e-147	Mac-A	IL10
331	6.98219e-152	-0.798875	0.012	0.453	2.28583e-147	Mac-A	RN7SL1
332	1.00008e-151	-0.699833	0.026	0.491	3.27405e-147	Mac-A	EDEM1
333	1.56718e-148	-0.85981	0.006	0.431	5.13063e-144	Mac-A	PTGER2
334	1.65158e-148	-0.787781	0.007	0.433	5.40696e-144	Mac-A	MFSD2A
335	4.48806e-148	-0.753477	0.101	0.651	1.4693e-143	Mac-A	THBD
336	2.06744e-147	-1.3306	0.073	0.56	6.7684e-143	Mac-A	CCL20
337	2.12267e-146	-0.701246	0.015	0.449	6.94921e-142	Mac-A	SORL1
338	4.70404e-146	-0.993397	0.049	0.528	1.54001e-141	Mac-A	IL1R2
339	6.63972e-146	-0.847789	0.034	0.494	2.17371e-141	Mac-A	OSM
340	2.03472e-144	-0.769747	0.035	0.497	6.66127e-140	Mac-A	PAPSS2
341	3.1632e-144	-0.724149	0.02	0.458	1.03557e-139	Mac-A	RAB11FIP1
342	1.12114e-143	-0.870073	0.073	0.578	3.67038e-139	Mac-A	DDX3Y
343	3.86822e-143	-0.788926	0.215	0.828	1.26638e-138	Mac-A	CCL3
344	7.29608e-143	-0.812425	0.007	0.42	2.38859e-138	Mac-A	SFMBT2
345	1.24804e-142	-1.07257	0.007	0.42	4.08583e-138	Mac-A	APOBEC3A
346	6.69984e-140	-0.886498	0.018	0.441	2.19339e-135	Mac-A	ZFX
347	3.83433e-139	-0.749092	0.282	0.941	1.25528e-134	Mac-A	CD44
348	1.5311e-138	-0.861248	0.07	0.56	5.01251e-134	Mac-A	RP11.290F20.3
349	2.26935e-138	-1.11682	0.002	0.397	7.4294e-134	Mac-A	FFAR2
350	8.92669e-138	-0.709854	0.057	0.532	2.92242e-133	Mac-A	CCDC71L
351	2.92593e-137	-0.725042	0.002	0.392	9.57892e-133	Mac-A	NCR3LG1
352	1.09684e-136	-0.707897	0.253	0.91	3.59083e-132	Mac-A	S100A10
353	2.5548e-136	-0.894559	0.003	0.394	8.3639e-132	Mac-A	SLAMF7
354	9.63386e-136	-0.833341	0.002	0.391	3.15393e-131	Mac-A	FAM65B
355	4.73817e-134	-0.714625	0.008	0.402	1.55118e-129	Mac-A	LINC00877
356	6.70067e-134	-0.966749	0.02	0.433	2.19366e-129	Mac-A	DNAAF1
357	4.443e-133	1.276	0.622	0.284	1.45455e-128	Mac-A	LYVE1
358	3.06021e-131	-1.00952	0.001	0.376	1.00185e-126	Mac-A	LILRA3
359	2.04341e-130	-0.743797	0.006	0.388	6.68971e-126	Mac-A	SNORD3D
360	6.38071e-129	-1.03818	0.009	0.393	2.08892e-124	Mac-A	TNIP3
361	1.0843e-128	-0.701223	0.006	0.385	3.54977e-124	Mac-A	KCNE1
362	1.154e-126	-0.700848	0.035	0.452	3.77797e-122	Mac-A	LILRB1
363	1.87352e-124	1.0026	0.714	0.615	6.13352e-120	Mac-A	VSIG4
364	6.56621e-120	-0.728123	0.027	0.418	2.14965e-115	Mac-A	RP11.386I14.4
365	8.47716e-116	-1.14451	0.001	0.338	2.77525e-111	Mac-A	XIST
366	1.45109e-114	0.828021	0.738	0.855	4.75056e-110	Mac-A	VAMP8
367	2.50983e-113	-0.745722	0.006	0.347	8.21667e-109	Mac-A	SELL
368	3.48051e-112	-0.770202	0.007	0.346	1.13945e-107	Mac-A	C19orf59
369	2.63042e-111	-0.729513	0.007	0.344	8.61148e-107	Mac-A	ZBTB10
370	5.34588e-106	-0.753126	0.053	0.442	1.75014e-101	Mac-A	AREG
371	2.33767e-105	-0.702068	0.006	0.327	7.65307e-101	Mac-A	RASGRP3
372	3.60631e-103	-0.727839	0.005	0.317	1.18063e-98	Mac-A	AGPAT9
373	1.34703e-96	-0.746089	0.045	0.4	4.40991e-92	Mac-A	CCL3L1
374	2.47851e-96	1.09553	0.664	0.558	8.11414e-92	Mac-A	TXNIP
375	7.68396e-95	0.740452	0.723	0.876	2.51557e-90	Mac-A	SNX3
376	1.19396e-92	-0.742368	0	0.277	3.90879e-88	Mac-A	TNFSF14
377	2.81472e-92	-0.926148	0.013	0.31	9.21482e-88	Mac-A	PTX3
378	7.45892e-91	1.27358	0.584	0.391	2.4419e-86	Mac-A	TMEM176B
379	2.07103e-90	-0.710649	0.008	0.292	6.78012e-86	Mac-A	RPPH1
380	5.76075e-89	-0.956185	0.01	0.293	1.88596e-84	Mac-A	S100A12
381	4.10435e-82	0.90637	0.681	0.777	1.34368e-77	Mac-A	BLVRB
382	1.82404e-81	-0.815395	0.003	0.255	5.97153e-77	Mac-A	TEX14
383	6.90708e-79	-1.16282	0.005	0.252	2.26124e-74	Mac-A	SERPINB2
384	9.17662e-79	0.855269	0.677	0.768	3.00424e-74	Mac-A	MS4A4A
385	1.92467e-69	1.0373	0.568	0.438	6.30098e-65	Mac-A	ALOX5AP
386	2.45043e-68	0.844631	0.661	0.789	8.02221e-64	Mac-A	AP2S1
387	3.67706e-59	0.795447	0.654	0.733	1.20379e-54	Mac-A	RGS2
388	7.52856e-59	0.71292	0.664	0.865	2.4647e-54	Mac-A	PPIB
389	2.87684e-58	1.25379	0.473	0.298	9.4182e-54	Mac-A	TMEM176A
390	2.01938e-54	0.702114	0.651	0.835	6.61104e-50	Mac-A	NDUFA4
391	2.77825e-51	1.29141	0.435	0.265	9.09542e-47	Mac-A	PMP22
392	3.81526e-50	0.894311	0.622	0.766	1.24904e-45	Mac-A	CLTA
393	1.15334e-48	0.811204	0.613	0.72	3.7758e-44	Mac-A	CD81
394	7.28986e-38	0.730915	0.603	0.773	2.38656e-33	Mac-A	PDIA6
395	6.46059e-33	1.17098	0.34	0.202	2.11507e-28	Mac-A	GPR34
396	4.45148e-32	1.04296	0.255	0.107	1.45733e-27	Mac-A	CD209
397	8.57147e-29	1.06534	0.449	0.403	2.80613e-24	Mac-A	AKR1B1
398	1.25019e-26	0.921325	0.505	0.533	4.09286e-22	Mac-A	PDIA4
399	4.15071e-26	1.02459	0.408	0.332	1.35886e-21	Mac-A	DAB2
400	1.51443e-23	0.801123	0.502	0.554	4.95793e-19	Mac-A	SAP30
401	4.05825e-20	0.706923	0.562	0.805	1.32859e-15	Mac-A	POLR2L
402	9.92067e-19	1.05992	0.365	0.307	3.24783e-14	Mac-A	MT1X
403	2.32093e-17	1.04333	0.424	0.435	7.59825e-13	Mac-A	GYPC
404	3.60673e-16	0.847813	0.481	0.58	1.18077e-11	Mac-A	TUBB
405	2.88241e-15	0.949341	0.427	0.461	9.43642e-11	Mac-A	PEBP1
406	5.96916e-15	0.867296	0.367	0.327	1.95418e-10	Mac-A	PDK4
407	1.83044e-12	0.696636	0.508	0.697	5.99248e-08	Mac-A	MANF
408	1.48018e-08	0.844374	0.431	0.538	0.000484582	Mac-A	PLD3
409	1.68439e-08	0.719861	0.289	0.253	0.000551437	Mac-A	SLCO2B1
410	1.5545e-06	0.931597	0.27	0.256	0.0508911	Mac-A	VEGFB
411	5.13056e-06	0.868138	0.269	0.258	0.167964	Mac-A	IDH1
412	7.24174e-06	0.732467	0.452	0.635	0.23708	Mac-A	MIF
413	2.15619e-05	0.895941	0.269	0.266	0.705893	Mac-A	NME1
414	0.00201461	0.798469	0.285	0.315	1	Mac-A	CD59
415	0.00563256	0.824738	0.249	0.267	1	Mac-A	ARL2
416	0.00640872	0.903635	0.277	0.314	1	Mac-A	STRA13
417	3.70294e-278	1.26951	0.746	0.01	1.21227e-273	Mac-B	MMRN2
418	1.40183e-270	1.20416	0.627	0.005	4.5893e-266	Mac-B	DOCK9
419	3.86386e-259	1.31806	0.712	0.01	1.26495e-254	Mac-B	PTPRG
420	1.80107e-249	1.1856	0.729	0.011	5.89635e-245	Mac-B	ESAM
421	2.74729e-248	1.51012	0.712	0.011	8.99407e-244	Mac-B	PTPRB
422	3.4377e-247	1.27895	0.712	0.011	1.12544e-242	Mac-B	GPR116
423	3.14036e-245	0.896332	0.542	0.004	1.02809e-240	Mac-B	RUNX1T1
424	2.04911e-241	0.956586	0.576	0.005	6.70838e-237	Mac-B	CDH5
425	7.97932e-231	1.3676	0.746	0.015	2.61227e-226	Mac-B	ELTD1
426	6.55259e-228	0.785794	0.492	0.003	2.14519e-223	Mac-B	CXorf36
427	1.5836e-227	0.769913	0.492	0.003	5.18439e-223	Mac-B	MYCT1
428	3.33057e-222	1.07297	0.559	0.006	1.09036e-217	Mac-B	KDR
429	1.28779e-218	1.51474	0.864	0.026	4.21595e-214	Mac-B	SYNE2
430	1.03549e-214	0.988312	0.576	0.007	3.39e-210	Mac-B	ALPL
431	1.07106e-214	1.56415	0.831	0.023	3.50644e-210	Mac-B	RAMP3
432	9.3474e-214	0.844481	0.559	0.007	3.06015e-209	Mac-B	ERG
433	6.21438e-210	1.25056	0.729	0.016	2.03446e-205	Mac-B	NFIB
434	1.20527e-205	1.37964	0.746	0.019	3.94583e-201	Mac-B	CLEC14A
435	4.17641e-204	1.56027	0.644	0.012	1.36727e-199	Mac-B	MMRN1
436	2.65431e-198	1.08842	0.61	0.011	8.68968e-194	Mac-B	TJP1
437	5.27237e-196	1.34084	0.695	0.017	1.72607e-191	Mac-B	WWTR1
438	1.15787e-192	1.36119	0.712	0.018	3.79063e-188	Mac-B	HSPG2
439	2.96107e-186	1.31074	0.695	0.018	9.69396e-182	Mac-B	SOX18
440	2.28314e-184	0.974438	0.525	0.008	7.47453e-180	Mac-B	NCKAP1
441	2.27761e-181	1.19248	0.61	0.013	7.45645e-177	Mac-B	TGFBR3
442	4.82552e-179	1.42194	0.678	0.018	1.57978e-174	Mac-B	SLCO2A1
443	4.35863e-178	0.97082	0.492	0.007	1.42693e-173	Mac-B	PALMD
444	4.7343e-178	0.797741	0.441	0.004	1.54991e-173	Mac-B	HIF3A
445	7.50695e-178	0.716546	0.458	0.005	2.45762e-173	Mac-B	RAPGEF5
446	3.22425e-177	0.745426	0.458	0.005	1.05555e-172	Mac-B	COL4A1
447	2.40078e-176	1.22389	0.695	0.02	7.85966e-172	Mac-B	JAM2
448	5.41756e-174	1.3448	0.661	0.018	1.7736e-169	Mac-B	SIX3
449	9.60349e-174	1.07737	0.729	0.023	3.14399e-169	Mac-B	CYYR1
450	2.76147e-172	1.61321	0.847	0.035	9.04051e-168	Mac-B	PRSS23
451	2.06853e-171	0.991568	0.492	0.007	6.77195e-167	Mac-B	PCDH17
452	3.27714e-171	1.36798	0.678	0.02	1.07287e-166	Mac-B	LIFR
453	2.40333e-170	1.04854	0.576	0.012	7.86804e-166	Mac-B	LDB2
454	2.93251e-166	1.06719	0.475	0.007	9.60046e-162	Mac-B	GALNT15
455	6.68411e-164	1.16889	0.678	0.021	2.18824e-159	Mac-B	LIMCH1
456	1.00953e-161	1.11392	0.559	0.013	3.30501e-157	Mac-B	MCF2L
457	3.38018e-161	0.804027	0.458	0.007	1.1066e-156	Mac-B	OSMR
458	1.01467e-156	1.05422	0.593	0.016	3.32184e-152	Mac-B	BCAM
459	4.97544e-156	0.776152	0.492	0.009	1.62886e-151	Mac-B	SHANK3
460	5.55868e-155	1.22947	0.661	0.021	1.8198e-150	Mac-B	PODXL
461	2.01314e-154	1.0181	0.525	0.011	6.5906e-150	Mac-B	ABCB1
462	1.35447e-153	0.85968	0.593	0.016	4.43427e-149	Mac-B	COL18A1
463	4.37323e-153	1.15865	0.712	0.026	1.43171e-148	Mac-B	CRIP2
464	6.07424e-152	1.10335	0.661	0.022	1.98858e-147	Mac-B	ARHGAP29
465	1.00927e-149	1.11171	0.559	0.014	3.30414e-145	Mac-B	RBMS3
466	2.71445e-148	0.695493	0.424	0.006	8.88657e-144	Mac-B	SHROOM4
467	9.42439e-145	0.873685	0.458	0.009	3.08536e-140	Mac-B	CD34
468	2.21609e-144	1.53351	0.78	0.037	7.25505e-140	Mac-B	ITM2A
469	3.65338e-143	0.733517	0.339	0.003	1.19604e-138	Mac-B	DLL4
470	1.14635e-142	1.35329	0.678	0.027	3.75291e-138	Mac-B	APOLD1
471	4.19506e-139	1.02273	0.559	0.016	1.37338e-134	Mac-B	PLSCR4
472	7.69389e-138	1.10024	0.593	0.019	2.51883e-133	Mac-B	EMCN
473	6.32859e-135	0.771918	0.424	0.008	2.07185e-130	Mac-B	EPB41L4A
474	1.56419e-133	0.732256	0.441	0.009	5.12083e-129	Mac-B	ITGA10
475	2.08724e-133	1.12393	0.661	0.027	6.83321e-129	Mac-B	ITGA6
476	8.9865e-132	0.970076	0.458	0.01	2.942e-127	Mac-B	PREX2
477	1.13925e-129	0.983046	0.508	0.014	3.72967e-125	Mac-B	SELP
478	1.57349e-128	1.26519	0.576	0.02	5.15128e-124	Mac-B	S1PR1
479	4.7918e-128	0.728135	0.492	0.013	1.56874e-123	Mac-B	RASIP1
480	7.24649e-128	0.763792	0.39	0.007	2.37235e-123	Mac-B	SOX7
481	8.27689e-128	0.767936	0.39	0.007	2.70969e-123	Mac-B	ITIH5
482	9.89937e-127	1.16304	0.644	0.027	3.24086e-122	Mac-B	PTRF
483	1.16626e-126	0.980823	0.475	0.012	3.81812e-122	Mac-B	PPFIBP1
484	2.04137e-126	1.02324	0.525	0.016	6.68304e-122	Mac-B	SRPX
485	6.53955e-126	0.871683	0.475	0.012	2.14092e-121	Mac-B	ECSCR
486	1.78798e-122	0.84202	0.441	0.01	5.85349e-118	Mac-B	SH3BGRL2
487	1.0954e-120	0.930931	0.576	0.022	3.58613e-116	Mac-B	TINAGL1
488	3.41473e-120	0.841562	0.424	0.01	1.11792e-115	Mac-B	AC011526.1
489	4.23351e-120	0.745238	0.424	0.01	1.38597e-115	Mac-B	TEK
490	1.45714e-119	1.03307	0.492	0.015	4.77038e-115	Mac-B	NR2F2
491	6.73699e-119	1.02334	0.475	0.014	2.20556e-114	Mac-B	GJA1
492	4.95713e-118	0.746364	0.356	0.006	1.62287e-113	Mac-B	BTNL9
493	7.41591e-118	0.72419	0.356	0.006	2.42782e-113	Mac-B	RP11.89K21.1
494	5.1708e-115	0.894854	0.525	0.019	1.69282e-110	Mac-B	TENC1
495	4.39288e-114	0.815552	0.593	0.025	1.43814e-109	Mac-B	FERMT2
496	5.33939e-111	0.742689	0.458	0.014	1.74801e-106	Mac-B	MSRB3
497	5.73287e-111	0.808759	0.407	0.01	1.87683e-106	Mac-B	ABCG2
498	3.54488e-109	1.02214	0.542	0.022	1.16052e-104	Mac-B	PKP4
499	4.62039e-109	0.811526	0.424	0.011	1.51262e-104	Mac-B	NES
500	8.83232e-109	0.725127	0.39	0.009	2.89152e-104	Mac-B	CAV2
501	1.71503e-108	0.769596	0.39	0.009	5.61468e-104	Mac-B	MECOM
502	4.78158e-108	1.29284	0.542	0.023	1.56539e-103	Mac-B	FMO2
503	6.84396e-108	0.858477	0.305	0.004	2.24057e-103	Mac-B	PKHD1L1
504	5.08609e-107	1.14967	0.627	0.033	1.66508e-102	Mac-B	CNN3
505	7.61176e-107	0.749934	0.356	0.007	2.49194e-102	Mac-B	FBLN2
506	2.21815e-105	1.1264	0.576	0.027	7.26179e-101	Mac-B	MKL2
507	2.79874e-104	1.18087	0.695	0.044	9.16251e-100	Mac-B	MPZL2
508	5.7415e-104	1.46058	0.678	0.041	1.87965e-99	Mac-B	CLDN5
509	1.73581e-103	0.745426	0.373	0.009	5.68269e-99	Mac-B	VWA1
510	2.55566e-103	0.727553	0.373	0.009	8.36672e-99	Mac-B	NXN
511	5.50257e-103	1.28299	0.61	0.032	1.80143e-98	Mac-B	C8orf4
512	1.43564e-101	1.31199	0.814	0.063	4.70001e-97	Mac-B	SPARC
513	2.5615e-101	0.872876	0.407	0.012	8.38585e-97	Mac-B	COL8A1
514	1.0209e-100	1.89047	0.932	0.096	3.34223e-96	Mac-B	SPARCL1
515	5.16996e-100	0.700622	0.525	0.023	1.69254e-95	Mac-B	CFI
516	3.13617e-97	1.17257	0.763	0.058	1.02672e-92	Mac-B	NPDC1
517	1.61565e-94	1.01434	0.576	0.031	5.28931e-90	Mac-B	FOXC1
518	1.57125e-92	0.794887	0.424	0.015	5.14395e-88	Mac-B	ITGA1
519	5.36676e-91	1.39702	0.576	0.033	1.75697e-86	Mac-B	CP
520	7.71896e-91	0.775237	0.373	0.011	2.52703e-86	Mac-B	CPLX1
521	2.19624e-90	1.86021	0.881	0.096	7.19005e-86	Mac-B	VWF
522	5.0497e-90	0.78298	0.254	0.004	1.65317e-85	Mac-B	THSD7A
523	1.00941e-89	1.24412	0.78	0.068	3.30461e-85	Mac-B	PDLIM1
524	2.20118e-89	0.696311	0.373	0.011	7.20623e-85	Mac-B	PROCR
525	5.31965e-89	0.780269	0.39	0.013	1.74155e-84	Mac-B	MYO10
526	1.61719e-88	1.18166	0.593	0.037	5.29437e-84	Mac-B	CFH
527	6.44343e-88	0.765682	0.373	0.012	2.10945e-83	Mac-B	SMAD6
528	1.28147e-86	1.00633	0.492	0.024	4.19528e-82	Mac-B	CAV1
529	1.52437e-86	1.17428	0.661	0.049	4.99049e-82	Mac-B	ACVRL1
530	1.78218e-86	0.839122	0.475	0.022	5.83449e-82	Mac-B	LHFP
531	1.65045e-85	0.70053	0.475	0.022	5.40326e-81	Mac-B	LIMS2
532	5.57699e-83	0.725485	0.492	0.025	1.82579e-78	Mac-B	GRB10
533	1.01993e-82	1.19727	0.712	0.059	3.33906e-78	Mac-B	SDPR
534	8.82846e-81	0.972307	0.559	0.036	2.89026e-76	Mac-B	PIK3R3
535	4.42012e-80	0.930384	0.542	0.033	1.44706e-75	Mac-B	ZEB1
536	2.68639e-79	1.28368	0.763	0.077	8.79469e-75	Mac-B	BMPR2
537	3.60449e-79	1.28995	0.797	0.08	1.18004e-74	Mac-B	IFI27
538	1.86625e-78	0.868911	0.508	0.03	6.10973e-74	Mac-B	PLAT
539	1.60835e-76	1.32284	0.763	0.081	5.26541e-72	Mac-B	SPTBN1
540	8.72841e-76	0.893599	0.542	0.035	2.85751e-71	Mac-B	LEPR
541	1.84665e-75	0.979182	0.627	0.05	6.04558e-71	Mac-B	MLLT4
542	1.73972e-74	1.62383	0.881	0.118	5.69549e-70	Mac-B	TIMP3
543	3.90294e-74	0.996786	0.458	0.025	1.27774e-69	Mac-B	PLVAP
544	9.06408e-74	0.744932	0.542	0.036	2.9674e-69	Mac-B	PTPRM
545	4.8555e-73	1.14865	0.678	0.063	1.58959e-68	Mac-B	SLC9A3R2
546	1.6107e-72	1.21518	0.61	0.05	5.2731e-68	Mac-B	CRIM1
547	5.31509e-72	0.822026	0.525	0.035	1.74005e-67	Mac-B	CALD1
548	9.87151e-72	0.709071	0.373	0.016	3.23174e-67	Mac-B	ROBO4
549	1.06561e-70	0.920946	0.508	0.034	3.48858e-66	Mac-B	PPAP2A
550	2.08817e-70	1.35403	0.644	0.057	6.83625e-66	Mac-B	C10orf10
551	3.84652e-70	0.721819	0.373	0.016	1.25927e-65	Mac-B	FAM107A
552	8.71799e-70	0.948364	0.61	0.05	2.85409e-65	Mac-B	AKAP12
553	9.79698e-69	0.832605	0.441	0.025	3.20733e-64	Mac-B	MAST4
554	2.15267e-66	1.14889	0.644	0.061	7.0474e-62	Mac-B	HYAL2
555	5.09293e-65	1.03367	0.627	0.058	1.66732e-60	Mac-B	ADIRF
556	3.01769e-64	1.58616	0.898	0.151	9.87931e-60	Mac-B	EPAS1
557	4.57661e-64	1.40271	0.746	0.094	1.49829e-59	Mac-B	FLT1
558	1.42822e-62	0.730547	0.305	0.012	4.67571e-58	Mac-B	MYLK
559	4.55075e-61	0.717149	0.39	0.022	1.48983e-56	Mac-B	CD320
560	7.73434e-61	1.13949	0.864	0.133	2.53207e-56	Mac-B	PIK3C2A
561	1.02536e-60	0.824705	0.39	0.022	3.35682e-56	Mac-B	EFNA1
562	2.74471e-59	1.04118	0.322	0.015	8.98564e-55	Mac-B	CYP26B1
563	4.88522e-59	0.945319	0.61	0.063	1.59932e-54	Mac-B	SMAD7
564	7.11044e-59	0.865334	0.305	0.013	2.32781e-54	Mac-B	VCAM1
565	4.29968e-58	1.40143	0.729	0.096	1.40763e-53	Mac-B	TM4SF1
566	6.03474e-58	1.15622	0.678	0.081	1.97565e-53	Mac-B	LRRC32
567	2.85675e-57	0.945449	0.525	0.047	9.35244e-53	Mac-B	CALCRL
568	1.37785e-56	1.03433	0.593	0.061	4.51079e-52	Mac-B	FLNB
569	2.92823e-55	0.695865	0.492	0.04	9.58643e-51	Mac-B	MTUS1
570	1.53621e-54	1.34657	0.949	0.172	5.02923e-50	Mac-B	IGFBP4
571	8.49868e-54	0.764515	0.492	0.042	2.7823e-49	Mac-B	AKT3
572	1.16917e-53	1.38145	0.847	0.152	3.82764e-49	Mac-B	TGM2
573	2.1384e-53	1.1681	0.441	0.034	7.00069e-49	Mac-B	DARC
574	1.21504e-52	0.772762	0.593	0.062	3.97781e-48	Mac-B	GPR56
575	1.22994e-52	1.18137	0.424	0.032	4.02657e-48	Mac-B	STC1
576	3.9066e-52	0.764899	0.508	0.046	1.27894e-47	Mac-B	LAMB2
577	4.17931e-52	0.852562	0.339	0.02	1.36822e-47	Mac-B	DNASE1L3
578	4.31326e-52	0.87146	0.525	0.052	1.41207e-47	Mac-B	HEG1
579	6.1501e-51	0.742593	0.525	0.051	2.01342e-46	Mac-B	ARHGEF12
580	4.29165e-50	0.914342	0.576	0.065	1.405e-45	Mac-B	GNG11
581	5.93319e-50	0.811799	0.475	0.043	1.94241e-45	Mac-B	EFNB2
582	1.86964e-48	0.767049	0.492	0.047	6.12081e-44	Mac-B	CTNNAL1
583	7.04187e-48	1.11335	0.831	0.155	2.30537e-43	Mac-B	KLF9
584	1.09693e-46	0.932374	0.373	0.027	3.59114e-42	Mac-B	SPRY1
585	1.14206e-44	0.701987	0.712	0.102	3.73887e-40	Mac-B	GIMAP7
586	6.21055e-44	0.834095	0.407	0.035	2.03321e-39	Mac-B	WDR60
587	9.57308e-44	0.84986	0.39	0.033	3.13403e-39	Mac-B	SLC2A1
588	3.84248e-43	1.32249	0.932	0.267	1.25795e-38	Mac-B	IL6ST
589	2.23783e-42	0.69575	0.475	0.05	7.32622e-38	Mac-B	CAMSAP2
590	4.13006e-42	0.728416	0.492	0.054	1.3521e-37	Mac-B	ODF2L
591	1.31919e-41	0.916578	0.39	0.035	4.31878e-37	Mac-B	GPR126
592	5.16582e-41	0.829753	0.39	0.035	1.69119e-36	Mac-B	ADAMTS1
593	1.12823e-39	0.949912	0.695	0.123	3.69359e-35	Mac-B	NCOA7
594	9.01707e-39	1.02316	0.695	0.13	2.95201e-34	Mac-B	TNFSF10
595	1.46405e-38	0.930022	0.678	0.114	4.793e-34	Mac-B	EMP2
596	9.10303e-38	0.842335	0.508	0.068	2.98015e-33	Mac-B	SYNE1
597	5.10726e-37	0.78174	0.61	0.096	1.67201e-32	Mac-B	ZBTB16
598	7.32572e-36	1.10298	0.729	0.157	2.39829e-31	Mac-B	DST
599	9.18261e-36	1.04498	0.356	0.034	3.0062e-31	Mac-B	IGFBP3
600	3.34359e-35	0.734431	0.678	0.124	1.09462e-30	Mac-B	KMT2A
601	1.74608e-34	0.703732	0.475	0.062	5.71632e-30	Mac-B	NFIA
602	1.93029e-34	0.93638	0.729	0.165	6.3194e-30	Mac-B	NEDD9
603	4.11598e-34	1.15348	0.915	0.292	1.34749e-29	Mac-B	ENG
604	5.32437e-34	0.937754	0.508	0.075	1.74309e-29	Mac-B	ACKR3
605	8.04082e-34	1.1463	0.627	0.115	2.6324e-29	Mac-B	PTGDS
606	1.38539e-32	1.28974	0.831	0.23	4.53548e-28	Mac-B	CLU
607	2.73803e-32	1.11324	0.881	0.267	8.96377e-28	Mac-B	TCF4
608	2.2837e-31	0.803989	0.661	0.131	7.47639e-27	Mac-B	LUZP1
609	2.31889e-31	0.957695	0.678	0.145	7.59157e-27	Mac-B	ZBTB38
610	2.89565e-31	0.81123	0.356	0.039	9.47976e-27	Mac-B	ZNF37A
611	3.61012e-31	1.11102	0.661	0.146	1.18188e-26	Mac-B	INSR
612	6.086e-31	0.863653	0.322	0.033	1.99243e-26	Mac-B	EFEMP1
613	1.79123e-30	0.909929	0.831	0.195	5.86414e-26	Mac-B	EGFL7
614	2.65821e-30	0.80954	0.644	0.136	8.70244e-26	Mac-B	FRYL
615	2.79911e-30	0.967029	0.576	0.109	9.16374e-26	Mac-B	ID1
616	4.5206e-30	0.765463	0.322	0.033	1.47995e-25	Mac-B	CYR61
617	1.13347e-29	0.722792	0.627	0.117	3.71075e-25	Mac-B	NRP1
618	1.21308e-29	0.937515	0.746	0.191	3.97139e-25	Mac-B	NKTR
619	1.97011e-28	0.72038	0.627	0.132	6.44976e-24	Mac-B	GBP4
620	8.70047e-28	0.715442	0.254	0.022	2.84836e-23	Mac-B	EDN1
621	3.12335e-27	0.919378	0.898	0.314	1.02252e-22	Mac-B	APP
622	4.40447e-26	0.74092	0.356	0.047	1.44194e-21	Mac-B	EFNB1
623	4.48243e-26	0.700974	0.627	0.144	1.46746e-21	Mac-B	PSIP1
624	4.9668e-26	0.714071	0.508	0.092	1.62603e-21	Mac-B	ZNF503
625	1.55277e-25	0.893044	0.627	0.149	5.08344e-21	Mac-B	SPEN
626	7.39012e-25	0.766796	0.695	0.184	2.41938e-20	Mac-B	PCMTD1
627	1.07155e-24	0.755847	0.78	0.213	3.50803e-20	Mac-B	A2M
628	1.19347e-24	0.933139	0.78	0.254	3.90719e-20	Mac-B	UTRN
629	3.69731e-24	0.875847	0.814	0.271	1.21043e-19	Mac-B	TGFBR2
630	8.65364e-24	0.980606	0.729	0.233	2.83303e-19	Mac-B	X7SK.2
631	3.80689e-23	0.752357	0.78	0.241	1.2463e-18	Mac-B	HIPK3
632	6.96247e-22	0.717355	0.356	0.053	2.27938e-17	Mac-B	NNMT
633	1.36625e-21	0.728167	0.678	0.198	4.47282e-17	Mac-B	PHACTR2
634	1.48815e-21	0.844124	0.407	0.074	4.87191e-17	Mac-B	IFITM1
635	1.50273e-21	0.889701	0.695	0.215	4.91965e-17	Mac-B	TSC22D1
636	2.02295e-21	0.798956	0.458	0.095	6.62273e-17	Mac-B	TNFRSF10D
637	2.08986e-21	0.719216	0.542	0.123	6.8418e-17	Mac-B	GIMAP5
638	6.77011e-21	0.695769	0.441	0.088	2.2164e-16	Mac-B	SOS1
639	6.87001e-21	0.914327	0.797	0.307	2.2491e-16	Mac-B	IGFBP7
640	7.44231e-21	0.804158	0.627	0.169	2.43646e-16	Mac-B	KIAA1109
641	3.10953e-20	0.788736	0.831	0.29	1.018e-15	Mac-B	CD59
642	3.59753e-20	0.69595	0.576	0.141	1.17776e-15	Mac-B	ZNF292
643	5.8778e-20	0.724531	0.729	0.252	1.92427e-15	Mac-B	RDX
644	1.07595e-19	0.805754	0.542	0.147	3.52246e-15	Mac-B	STARD8
645	1.71184e-19	0.833739	0.695	0.223	5.60421e-15	Mac-B	HES1
646	8.00435e-19	0.756471	0.847	0.35	2.62046e-14	Mac-B	RRBP1
647	2.69478e-18	0.780599	0.746	0.303	8.82216e-14	Mac-B	MACF1
648	8.6059e-18	0.900165	0.458	0.112	2.8174e-13	Mac-B	TFPI
649	1.22711e-16	0.755794	0.627	0.204	4.01732e-12	Mac-B	ZNF638
650	1.75469e-15	0.714806	0.746	0.314	5.74452e-11	Mac-B	NDRG1
651	9.74378e-08	-0.709582	0.746	0.801	0.00318992	Mac-B	VAMP8
652	2.63007e-07	-0.789137	0.576	0.735	0.00861032	Mac-B	BLVRB
653	3.85248e-07	-0.938081	0.441	0.633	0.0126122	Mac-B	EIF5A
654	5.75197e-07	-0.695605	0.61	0.726	0.0188308	Mac-B	SPI1
655	7.56479e-07	-0.79583	0.508	0.675	0.0247656	Mac-B	S100A8
656	1.65844e-05	-0.697353	0.458	0.626	0.542939	Mac-B	FPR1
657	0.000414275	-0.703529	0.407	0.553	1	Mac-B	PLTP
658	0.00042093	-0.75991	0.254	0.459	1	Mac-B	FOLR2
659	0.000433678	-0.700703	0.407	0.553	1	Mac-B	HMOX1
660	0.000901925	-0.923233	0.356	0.484	1	Mac-B	TMEM176B
661	0.00135622	-0.749826	0.373	0.468	1	Mac-B	NLRP3
662	0.00207265	-0.701095	0.136	0.296	1	Mac-B	NPL
663	0	1.97387	0.961	0.048	0	Mac-C	FCN1
664	0	1.76224	0.959	0.133	0	Mac-C	CD52
665	0	1.72913	0.819	0.095	0	Mac-C	TNFAIP6
666	0	1.62459	0.962	0.102	0	Mac-C	AQP9
667	0	1.54855	0.931	0.141	0	Mac-C	VCAN
668	0	1.41848	0.743	0.037	0	Mac-C	APOBEC3A
669	0	1.36569	0.671	0.027	0	Mac-C	LILRA3
670	0	1.27199	0.909	0.138	0	Mac-C	CFP
671	0	1.15021	0.838	0.097	0	Mac-C	SLC2A6
672	4.05473e-307	1.28464	0.863	0.127	1.32744e-302	Mac-C	CD300E
673	9.3154e-306	1.15238	0.969	0.244	3.04967e-301	Mac-C	FGR
674	1.04917e-305	1.29464	0.888	0.126	3.43477e-301	Mac-C	RP11.290F20.3
675	9.93094e-300	1.22487	0.894	0.149	3.25119e-295	Mac-C	LILRA5
676	9.96382e-284	1.23198	0.922	0.201	3.26196e-279	Mac-C	TREM1
677	1.13334e-279	1.09373	0.858	0.155	3.71034e-275	Mac-C	LTA4H
678	5.90762e-279	1.12519	0.969	0.244	1.93404e-274	Mac-C	CD48
679	4.25638e-278	1.0322	0.907	0.189	1.39345e-273	Mac-C	MYO1G
680	3.12783e-275	1.36305	0.663	0.047	1.02399e-270	Mac-C	FFAR2
681	2.29116e-272	1.09613	0.654	0.046	7.5008e-268	Mac-C	FAM65B
682	4.08248e-265	1.11123	0.886	0.21	1.33652e-260	Mac-C	GCH1
683	3.84014e-258	1.11751	0.678	0.068	1.25718e-253	Mac-C	PTGER2
684	6.15326e-253	1.05358	0.922	0.239	2.01446e-248	Mac-C	LILRB2
685	8.96533e-251	1.06556	0.9	0.215	2.93507e-246	Mac-C	GPCPD1
686	7.34242e-246	1.07426	0.935	0.257	2.40376e-241	Mac-C	LINC00936
687	4.73337e-242	0.863292	0.622	0.048	1.54961e-237	Mac-C	ECE1
688	9.40417e-241	1.09535	0.589	0.04	3.07874e-236	Mac-C	C19orf59
689	2.52202e-240	0.981599	0.847	0.157	8.25659e-236	Mac-C	LDLR
690	4.97928e-238	0.994762	0.777	0.143	1.63012e-233	Mac-C	RNF19B
691	6.82484e-237	1.06912	0.951	0.27	2.23432e-232	Mac-C	CCRL2
692	2.46693e-232	0.932749	0.931	0.266	8.07624e-228	Mac-C	BACH1
693	3.16187e-232	0.838151	0.652	0.065	1.03513e-227	Mac-C	FPR2
694	2.92617e-228	0.909694	0.943	0.268	9.57968e-224	Mac-C	FLNA
695	9.53544e-226	0.921147	0.61	0.055	3.12171e-221	Mac-C	CTB.61M7.2
696	2.21308e-225	0.982713	0.942	0.274	7.24519e-221	Mac-C	STX11
697	4.81481e-225	0.957488	0.696	0.095	1.57627e-220	Mac-C	LILRB1
698	3.28643e-224	1.23195	0.916	0.229	1.07591e-219	Mac-C	G0S2
699	9.11831e-224	0.888063	0.52	0.021	2.98515e-219	Mac-C	CDA
700	2.13738e-223	0.966335	0.934	0.281	6.99737e-219	Mac-C	STXBP2
701	3.39091e-222	0.783727	0.728	0.12	1.11011e-217	Mac-C	C19orf38
702	7.85619e-222	0.885119	0.981	0.379	2.57196e-217	Mac-C	PTPRC
703	9.54034e-219	0.958534	0.855	0.208	3.12332e-214	Mac-C	SLC25A37
704	8.10249e-218	1.20589	0.88	0.212	2.65259e-213	Mac-C	EREG
705	1.02297e-215	0.93978	0.988	0.405	3.34899e-211	Mac-C	SERPINA1
706	1.64885e-214	-0.790477	0.966	0.931	5.39801e-210	Mac-C	CD74
707	1.63508e-213	0.828175	0.848	0.2	5.35292e-209	Mac-C	LPCAT1
708	9.72224e-213	0.95354	0.828	0.195	3.18287e-208	Mac-C	IGSF6
709	4.22816e-211	1.629	0.47	0.013	1.38421e-206	Mac-C	SERPINB2
710	1.15178e-209	1.1365	0.658	0.086	3.77071e-205	Mac-C	DNAAF1
711	1.58042e-209	0.803758	0.637	0.084	5.17398e-205	Mac-C	LILRA2
712	1.95458e-209	1.14289	0.651	0.093	6.39891e-205	Mac-C	PLAC8
713	6.11036e-209	1.4365	0.513	0.031	2.00041e-204	Mac-C	S100A12
714	6.13042e-209	1.02448	0.862	0.214	2.00698e-204	Mac-C	DUSP6
715	4.34797e-208	0.724186	0.671	0.099	1.42344e-203	Mac-C	CPPED1
716	7.20929e-208	0.941426	0.957	0.322	2.36018e-203	Mac-C	ATP2B1
717	8.25851e-207	0.862669	0.827	0.193	2.70367e-202	Mac-C	CD97
718	3.60156e-206	0.898265	0.885	0.25	1.17908e-201	Mac-C	NUMB
719	1.50003e-203	0.97266	0.897	0.258	4.9108e-199	Mac-C	GK
720	1.71771e-201	0.820562	0.7	0.115	5.62345e-197	Mac-C	DMXL2
721	3.89504e-200	0.783457	0.997	0.617	1.27516e-195	Mac-C	TIMP1
722	2.01487e-199	0.905295	0.897	0.274	6.59627e-195	Mac-C	UBE2D1
723	2.42945e-199	0.862256	0.604	0.075	7.95352e-195	Mac-C	LINC00877
724	3.16822e-199	0.83641	0.589	0.068	1.03721e-194	Mac-C	CPD
725	2.23657e-198	0.861465	0.783	0.18	7.32209e-194	Mac-C	WARS
726	9.56147e-198	-1.58882	0.28	0.842	3.13024e-193	Mac-C	C1QC
727	1.30429e-197	0.834698	0.759	0.159	4.26999e-193	Mac-C	PAG1
728	2.01481e-197	0.894298	0.913	0.285	6.59609e-193	Mac-C	EHD1
729	3.51453e-197	0.859591	0.968	0.374	1.15059e-192	Mac-C	ZEB2
730	1.21518e-196	-1.50384	0.325	0.869	3.97824e-192	Mac-C	C1QB
731	1.803e-196	0.885364	0.992	0.43	5.90267e-192	Mac-C	CD55
732	7.04383e-196	0.952612	0.742	0.15	2.30601e-191	Mac-C	CCDC71L
733	9.90307e-196	0.870178	0.951	0.318	3.24207e-191	Mac-C	LIMS1
734	6.06184e-195	0.900132	0.793	0.176	1.98452e-190	Mac-C	ABCA1
735	2.17663e-194	0.82109	0.656	0.105	7.12584e-190	Mac-C	CLEC12A
736	4.17554e-193	0.815853	0.824	0.215	1.36699e-188	Mac-C	UBE2J1
737	1.645e-191	0.874472	0.777	0.191	5.38542e-187	Mac-C	SLC43A2
738	9.89934e-191	0.809398	0.532	0.049	3.24085e-186	Mac-C	CDC42EP2
739	2.73428e-190	-1.33995	0.417	0.89	8.95149e-186	Mac-C	C1QA
740	1.05688e-189	0.79125	0.737	0.156	3.46003e-185	Mac-C	B4GALT5
741	4.70626e-187	0.751456	0.896	0.271	1.54074e-182	Mac-C	CSTA
742	1.6703e-186	-2.02644	0.185	0.763	5.46823e-182	Mac-C	F13A1
743	1.9678e-184	0.776032	0.869	0.251	6.44217e-180	Mac-C	MIR22HG
744	1.4959e-183	0.963335	0.678	0.135	4.89727e-179	Mac-C	CRIP1
745	5.3618e-183	0.950193	0.823	0.218	1.75535e-178	Mac-C	RP11.1143G9.4
746	3.6337e-181	0.91498	0.884	0.242	1.1896e-176	Mac-C	RP11.701P16.5
747	1.86874e-179	0.856337	0.759	0.195	6.11788e-175	Mac-C	PLBD1
748	1.91874e-179	0.796873	0.382	0.004	6.28157e-175	Mac-C	FOLR3
749	4.18242e-179	0.825447	0.544	0.066	1.36924e-174	Mac-C	PDE4D
750	6.56617e-178	0.883115	0.591	0.093	2.14963e-173	Mac-C	SFMBT2
751	1.52673e-177	0.832676	0.639	0.113	4.99821e-173	Mac-C	MLTK
752	2.42e-177	-2.34568	0.114	0.709	7.92259e-173	Mac-C	PLTP
753	5.64562e-177	1.24159	0.754	0.177	1.84826e-172	Mac-C	CCL20
754	1.39209e-176	0.757536	0.545	0.059	4.55744e-172	Mac-C	CD36
755	3.78712e-176	0.745565	0.778	0.205	1.23983e-171	Mac-C	PHF20L1
756	2.86708e-175	0.739701	0.829	0.236	9.38626e-171	Mac-C	ADAM17
757	3.79755e-175	0.944446	0.528	0.062	1.24324e-170	Mac-C	SELL
758	5.52584e-173	1.10968	0.739	0.177	1.80905e-168	Mac-C	IL1RN
759	8.13127e-173	0.716887	0.943	0.327	2.66201e-168	Mac-C	LYN
760	1.93339e-170	0.806239	0.884	0.286	6.32952e-166	Mac-C	FAM107B
761	1.95754e-170	-2.13287	0.248	0.748	6.4086e-166	Mac-C	RNASE1
762	6.41839e-169	0.786838	0.949	0.373	2.10125e-164	Mac-C	EIF1B
763	1.45645e-167	0.885787	0.993	0.369	4.76814e-163	Mac-C	BCL2A1
764	1.5421e-165	0.875198	0.915	0.301	5.04853e-161	Mac-C	NLRP3
765	2.22096e-165	0.755296	0.656	0.136	7.27099e-161	Mac-C	LFNG
766	1.25724e-161	0.709675	0.698	0.159	4.11595e-157	Mac-C	MX2
767	3.39303e-161	0.767299	0.873	0.288	1.11081e-156	Mac-C	IFI30
768	1.46031e-160	0.988673	0.725	0.184	4.78078e-156	Mac-C	OLR1
769	1.21871e-159	0.717662	0.756	0.199	3.98983e-155	Mac-C	SERPINB8
770	2.08728e-158	1.18484	0.486	0.055	6.83333e-154	Mac-C	PTX3
771	3.50495e-158	0.742333	0.89	0.314	1.14745e-153	Mac-C	PLK3
772	4.18519e-158	0.709953	0.819	0.233	1.37015e-153	Mac-C	ITGAX
773	5.25396e-158	0.694626	0.555	0.081	1.72004e-153	Mac-C	RP11.295G20.2
774	3.13575e-156	-2.26157	0.077	0.647	1.02658e-151	Mac-C	SEPP1
775	8.4781e-156	1.07651	0.622	0.138	2.77556e-151	Mac-C	HES4
776	4.68971e-155	0.702013	0.721	0.178	1.53532e-150	Mac-C	NDRG1
777	2.2944e-154	0.78525	0.414	0.03	7.51141e-150	Mac-C	PTGES
778	4.76488e-154	0.754685	0.683	0.153	1.55993e-149	Mac-C	MARCKSL1
779	7.14558e-154	0.75659	0.961	0.37	2.33932e-149	Mac-C	WTAP
780	9.27607e-154	0.749868	0.751	0.192	3.0368e-149	Mac-C	LUCAT1
781	4.51557e-153	0.730544	0.988	0.404	1.47831e-148	Mac-C	NEAT1
782	5.90194e-150	0.799934	0.946	0.353	1.93218e-145	Mac-C	PIM3
783	3.0348e-148	-1.14982	0.72	0.873	9.93531e-144	Mac-C	TUBA1B
784	5.21527e-147	-1.00777	0.713	0.837	1.70737e-142	Mac-C	HLA.DPB1
785	8.72893e-147	0.72699	0.716	0.194	2.85768e-142	Mac-C	EMR2
786	9.04988e-145	0.806065	0.663	0.173	2.96275e-140	Mac-C	FBP1
787	1.73896e-143	0.796176	0.522	0.086	5.69299e-139	Mac-C	ANPEP
788	1.85979e-143	0.714593	0.884	0.299	6.08858e-139	Mac-C	RIPK2
789	2.98721e-143	0.884321	0.475	0.063	9.77952e-139	Mac-C	NKG7
790	4.90797e-142	0.773867	0.843	0.259	1.60677e-137	Mac-C	BIRC3
791	5.13327e-142	0.742934	0.662	0.168	1.68053e-137	Mac-C	ZBTB43
792	2.0731e-140	0.799732	0.488	0.073	6.78692e-136	Mac-C	FAM101B
793	1.29416e-139	0.749816	0.932	0.354	4.23681e-135	Mac-C	ICAM1
794	1.37395e-138	-0.918201	0.788	0.844	4.49804e-134	Mac-C	HLA.DPA1
795	2.90677e-136	0.726908	0.505	0.08	9.51618e-132	Mac-C	CHST7
796	7.62187e-129	0.806147	0.411	0.047	2.49525e-124	Mac-C	RETN
797	1.90132e-128	0.723752	0.686	0.193	6.22453e-124	Mac-C	GBP1
798	9.98101e-128	0.765137	0.497	0.091	3.26758e-123	Mac-C	LRG1
799	2.15015e-127	0.802666	0.394	0.043	7.03917e-123	Mac-C	SLC16A6
800	1.67358e-126	0.741027	0.698	0.199	5.47896e-122	Mac-C	CDC42EP3
801	2.77396e-122	0.705095	0.869	0.328	9.0814e-118	Mac-C	SLC2A3
802	5.53906e-121	0.709722	0.709	0.212	1.81338e-116	Mac-C	PHLDA1
803	9.00081e-114	-1.51412	0.173	0.618	2.94669e-109	Mac-C	ALOX5AP
804	5.6098e-106	0.698523	0.311	0.027	1.83654e-101	Mac-C	F3
805	1.31976e-103	-1.12554	0.421	0.75	4.32062e-99	Mac-C	VSIG4
806	1.70407e-94	-1.69765	0.176	0.556	5.57877e-90	Mac-C	FOLR2
807	6.57475e-91	-1.53231	0.162	0.545	2.15244e-86	Mac-C	LYVE1
808	1.20727e-83	-1.08837	0.583	0.701	3.95237e-79	Mac-C	CD81
809	3.01436e-75	-1.52611	0.084	0.44	9.86842e-71	Mac-C	PMP22
810	1.92438e-73	-1.33728	0.179	0.514	6.30002e-69	Mac-C	AKR1B1
811	1.54852e-71	-1.45884	0.062	0.406	5.06953e-67	Mac-C	RGS1
812	3.33138e-70	-0.726187	0.794	0.739	1.09063e-65	Mac-C	HLA.DRB5
813	6.20541e-69	-1.23093	0.319	0.581	2.03153e-64	Mac-C	HLA.DQA1
814	4.71028e-67	-1.33328	0.031	0.357	1.54205e-62	Mac-C	SLCO2B1
815	2.50857e-60	-1.12448	0.498	0.649	8.21255e-56	Mac-C	TXNIP
816	3.08147e-57	-1.23335	0.258	0.513	1.00881e-52	Mac-C	PEBP1
817	7.74759e-52	-0.864508	0.666	0.707	2.53641e-47	Mac-C	RGS2
818	1.19425e-47	-1.07746	0.07	0.333	3.90974e-43	Mac-C	VEGFB
819	4.85078e-45	-1.03422	0.429	0.567	1.58805e-40	Mac-C	SAP30
820	4.31987e-42	-1.04557	0.202	0.431	1.41424e-37	Mac-C	PTMS
821	8.54094e-42	-1.04436	0.233	0.45	2.79613e-37	Mac-C	ARHGAP18
822	1.35458e-39	-1.1954	0.212	0.425	4.43462e-35	Mac-C	DAB2
823	1.44406e-37	-0.942744	0.064	0.284	4.72757e-33	Mac-C	A2M
824	1.00012e-36	-1.16325	0.108	0.325	3.27418e-32	Mac-C	GPR34
825	1.02518e-34	-1.00536	0.372	0.522	3.35623e-30	Mac-C	TMEM176B
826	3.05503e-34	-0.871325	0.084	0.294	1.00016e-29	Mac-C	MRC1L1
827	1.11089e-33	-0.917687	0.061	0.263	3.63685e-29	Mac-C	STMN1
828	2.21499e-33	-0.940644	0.375	0.496	7.25143e-29	Mac-C	GSN
829	3.03531e-33	-0.856888	0.549	0.582	9.93698e-29	Mac-C	HLA.DQB1
830	1.12873e-31	-0.895292	0.189	0.389	3.69524e-27	Mac-C	ARL4C
831	2.53122e-29	-0.799803	0.093	0.279	8.28672e-25	Mac-C	USP53
832	2.68281e-27	-1.03229	0.225	0.39	8.78299e-23	Mac-C	PDK4
833	2.42083e-25	-0.728173	0.48	0.539	7.92533e-21	Mac-C	MSR1
834	9.15249e-25	-1.01011	0.184	0.346	2.99634e-20	Mac-C	LGMN
835	1.17688e-23	-1.02907	0.286	0.415	3.85286e-19	Mac-C	TMEM176A
836	4.44525e-21	-0.852923	0.158	0.312	1.45529e-16	Mac-C	TSPAN4
837	7.28609e-20	-0.775998	0.517	0.532	2.38532e-15	Mac-C	HMGN1
838	4.03639e-19	-0.928352	0.204	0.337	1.32143e-14	Mac-C	CD59
839	1.01943e-18	-0.882883	0.33	0.424	3.3374e-14	Mac-C	PPP1R14B
840	1.12704e-18	-0.703996	0.528	0.523	3.68972e-14	Mac-C	HLA.DMA
841	3.30014e-18	-0.864442	0.16	0.295	1.0804e-13	Mac-C	ARL2
842	5.27282e-17	-0.767471	0.143	0.272	1.72622e-12	Mac-C	PLAU
843	1.91451e-16	-0.821055	0.544	0.53	6.26771e-12	Mac-C	TUBB
844	4.47729e-15	-0.761556	0.579	0.547	1.46577e-10	Mac-C	RHOB
845	9.40658e-15	-0.954489	0.265	0.359	3.07952e-10	Mac-C	MT1X
846	4.58889e-14	-0.852437	0.476	0.492	1.50231e-09	Mac-C	PLD3
847	8.25999e-13	-0.750225	0.198	0.302	2.70416e-08	Mac-C	PARVB
848	9.83595e-12	-0.838746	0.551	0.508	3.22009e-07	Mac-C	PDIA4
849	3.21829e-11	-0.698769	0.198	0.295	1.0536e-06	Mac-C	TCEAL4
850	1.61169e-08	-0.722769	0.298	0.35	0.000527634	Mac-C	TMEM70
851	1.73474e-08	-0.756912	0.183	0.255	0.000567918	Mac-C	SRM
852	2.15516e-08	-0.755454	0.26	0.317	0.000705558	Mac-C	MAF
853	4.50848e-08	-0.769835	0.219	0.285	0.00147599	Mac-C	NME1
854	6.94227e-07	-0.704678	0.217	0.271	0.0227276	Mac-C	SLC1A3
855	3.36829e-06	-0.76105	0.231	0.274	0.110271	Mac-C	IDH1
856	0.000134945	-0.779169	0.46	0.418	1	Mac-C	GYPC
857	2.7935e-163	1.17642	0.893	0.303	9.14536e-159	Mac-D	ABL2
858	1.63957e-130	0.946648	0.559	0.088	5.36763e-126	Mac-D	SLC16A10
859	8.46562e-123	0.952057	0.889	0.38	2.77147e-118	Mac-D	NR4A2
860	1.7337e-122	1.30254	0.469	0.07	5.67578e-118	Mac-D	TEX14
861	1.53701e-116	0.845697	0.869	0.334	5.03188e-112	Mac-D	PPP1R10
862	2.3613e-114	0.832161	0.572	0.113	7.73043e-110	Mac-D	NRP2
863	1.86636e-112	0.894884	0.985	0.476	6.11009e-108	Mac-D	NEAT1
864	9.68703e-112	1.18041	0.371	0.04	3.17134e-107	Mac-D	2020-09-04
865	2.57795e-104	0.816115	0.845	0.332	8.43968e-100	Mac-D	SGK1
866	2.63131e-104	0.805049	0.906	0.425	8.61438e-100	Mac-D	NR4A1
867	3.60536e-103	0.74395	0.504	0.09	1.18032e-98	Mac-D	PDGFB
868	1.15992e-101	0.815103	0.539	0.112	3.79733e-97	Mac-D	GEM
869	1.5662e-101	0.726677	0.969	0.552	5.12742e-97	Mac-D	FOSB
870	1.5696e-100	0.887104	0.408	0.057	5.13854e-96	Mac-D	TCHH
871	6.02988e-100	1.33918	0.594	0.175	1.97406e-95	Mac-D	LINC00910
872	6.11561e-99	0.795745	0.415	0.066	2.00213e-94	Mac-D	SLC25A44
873	2.56614e-95	0.78041	0.758	0.289	8.40103e-91	Mac-D	SIPA1L1
874	8.18009e-95	1.0587	0.389	0.061	2.678e-90	Mac-D	MTMR4
875	7.72698e-93	0.77153	0.889	0.461	2.52966e-88	Mac-D	TNFAIP3
876	4.14569e-92	0.754933	0.784	0.287	1.35722e-87	Mac-D	STAB1
877	3.34207e-91	0.886056	0.692	0.243	1.09413e-86	Mac-D	WDR74
878	3.59153e-91	0.977019	0.26	0.019	1.17579e-86	Mac-D	PDE4C
879	8.64393e-91	0.798396	0.926	0.428	2.82985e-86	Mac-D	KDM6B
880	1.17077e-90	0.735579	0.803	0.332	3.83287e-86	Mac-D	NUFIP2
881	7.44854e-89	0.724619	0.417	0.076	2.4385e-84	Mac-D	RNU11
882	1.50849e-87	1.00328	0.585	0.183	4.93849e-83	Mac-D	ICAM4
883	2.65664e-87	1.00679	0.622	0.208	8.6973e-83	Mac-D	KB.1507C5.4
884	4.48863e-86	0.833728	0.321	0.041	1.46949e-81	Mac-D	KBTBD6
885	5.97345e-85	-0.829482	0.782	0.824	1.95559e-80	Mac-D	S100A9
886	7.5011e-83	0.763296	0.426	0.086	2.45571e-78	Mac-D	RNU12
887	2.73952e-82	0.788786	0.579	0.166	8.96864e-78	Mac-D	RP11.386I14.4
888	1.12377e-81	0.724737	0.731	0.275	3.67901e-77	Mac-D	HEXIM1
889	2.02296e-81	0.973474	0.585	0.187	6.62276e-77	Mac-D	KCNQ1OT1
890	1.17937e-80	0.71407	0.952	0.456	3.86101e-76	Mac-D	TNFAIP2
891	2.36582e-80	0.760344	0.766	0.325	7.74522e-76	Mac-D	NR4A3
892	1.6414e-79	0.696618	0.862	0.415	5.37361e-75	Mac-D	INSIG1
893	2.06176e-79	0.713196	0.64	0.215	6.7498e-75	Mac-D	INTS6
894	8.79707e-79	0.827967	0.646	0.225	2.87998e-74	Mac-D	NXF1
895	1.74188e-78	0.697293	0.945	0.439	5.70256e-74	Mac-D	WSB1
896	1.00765e-76	0.830406	0.574	0.19	3.29886e-72	Mac-D	SNORD3B.2
897	1.92648e-76	0.701264	0.902	0.441	6.30691e-72	Mac-D	NFKB1
898	1.69969e-75	0.700304	0.644	0.224	5.56446e-71	Mac-D	RALGDS
899	2.4366e-73	0.779585	0.782	0.36	7.97694e-69	Mac-D	TNF
900	7.53414e-72	0.840741	0.568	0.2	2.46653e-67	Mac-D	CYB5D1
901	3.71435e-70	0.701489	0.701	0.279	1.216e-65	Mac-D	NFKBID
902	4.20058e-70	0.700572	0.873	0.466	1.37519e-65	Mac-D	NFKBIZ
903	3.37943e-69	0.715628	0.91	0.441	1.10636e-64	Mac-D	CCNL1
904	1.62075e-68	0.715866	0.736	0.318	5.306e-64	Mac-D	MIR29A
905	1.82278e-67	0.702461	0.461	0.129	5.96741e-63	Mac-D	SNORD3A
906	4.12662e-67	0.762294	0.321	0.06	1.35097e-62	Mac-D	ICAM5
907	7.07003e-67	0.716262	0.703	0.298	2.31459e-62	Mac-D	SESTD1
908	6.43577e-65	0.701173	0.773	0.365	2.10694e-60	Mac-D	EIF4E
909	1.49147e-62	0.766969	0.579	0.222	4.88278e-58	Mac-D	RAPGEF2
910	6.23619e-61	0.700329	0.563	0.207	2.0416e-56	Mac-D	KMO
911	4.36327e-57	0.785942	0.467	0.157	1.42845e-52	Mac-D	SNORD3D
912	8.85345e-57	0.755969	0.646	0.281	2.89844e-52	Mac-D	LUCAT1
913	1.43763e-53	0.881373	0.598	0.269	4.70651e-49	Mac-D	DNAJA4
914	4.66843e-51	-0.940845	0.561	0.694	1.52835e-46	Mac-D	S100A8
915	8.56619e-51	0.696288	0.642	0.299	2.8044e-46	Mac-D	PTGS2
916	3.01849e-50	0.701428	0.535	0.209	9.88192e-46	Mac-D	MIR155HG
917	4.21692e-20	-0.805469	0.131	0.325	1.38053e-15	Mac-D	FCN1
918	2.01538e-17	-0.829789	0.227	0.379	6.59794e-13	Mac-D	CD52
919	0	2.06024	0.894	0.051	0	Mac-E	FCER1A
920	3.54926e-274	1.67385	0.633	0.017	1.16196e-269	Mac-E	CCL22
921	3.81841e-263	1.60344	0.739	0.038	1.25007e-258	Mac-E	CD1C
922	8.07245e-252	1.85178	0.845	0.065	2.64276e-247	Mac-E	CCR7
923	2.72564e-206	0.956828	0.556	0.023	8.9232e-202	Mac-E	RP11.404O13.5
924	1.24579e-183	1.23228	0.725	0.071	4.07847e-179	Mac-E	TMEM120B
925	1.79573e-182	1.23995	0.72	0.069	5.87887e-178	Mac-E	PKIB
926	9.1863e-180	1.04157	0.638	0.049	3.00741e-175	Mac-E	MCOLN2
927	1.49101e-173	0.932938	0.43	0.013	4.88126e-169	Mac-E	CD1E
928	6.81387e-173	0.878143	0.512	0.025	2.23073e-168	Mac-E	PLD4
929	6.0363e-165	1.30582	0.807	0.115	1.97616e-160	Mac-E	RHOF
930	8.04443e-163	1.12942	0.715	0.081	2.63358e-158	Mac-E	IL4I1
931	1.25214e-153	0.960787	0.396	0.014	4.09927e-149	Mac-E	SPIB
932	6.67336e-145	1.03443	0.556	0.047	2.18472e-140	Mac-E	PADI2
933	2.92403e-144	1.2887	0.773	0.121	9.57268e-140	Mac-E	AGPAT9
934	1.2607e-140	0.924836	0.493	0.035	4.12727e-136	Mac-E	IRF4
935	5.39411e-139	1.2297	0.831	0.127	1.76592e-134	Mac-E	XIST
936	7.26049e-137	1.19931	0.754	0.11	2.37694e-132	Mac-E	PDGFB
937	2.94611e-130	1.27305	0.691	0.102	9.64498e-126	Mac-E	DUSP4
938	1.04421e-120	1.39749	0.923	0.259	3.41852e-116	Mac-E	C15orf48
939	4.12168e-119	0.738004	0.517	0.053	1.34936e-114	Mac-E	NDRG2
940	3.69684e-115	1.03723	0.947	0.248	1.21027e-110	Mac-E	HLA.DMB
941	2.4542e-113	0.741738	0.314	0.013	8.03456e-109	Mac-E	CD70
942	4.55521e-113	0.946247	0.551	0.062	1.49128e-108	Mac-E	CST7
943	1.73385e-109	0.863925	0.531	0.065	5.67627e-105	Mac-E	BCL2
944	5.32103e-108	0.974899	0.734	0.141	1.742e-103	Mac-E	IL1R1
945	1.35151e-107	1.17946	0.937	0.315	4.42456e-103	Mac-E	GRASP
946	1.60667e-107	1.33016	0.812	0.191	5.25992e-103	Mac-E	PLAU
947	2.41912e-107	1.10401	0.604	0.093	7.91972e-103	Mac-E	NRARP
948	2.36881e-104	1.06396	0.783	0.186	7.75502e-100	Mac-E	ARID3A
949	3.45791e-104	0.936038	0.676	0.116	1.13205e-99	Mac-E	CCND2
950	3.83177e-103	1.13397	0.957	0.353	1.25445e-98	Mac-E	NR4A3
951	3.9057e-102	1.03278	0.792	0.187	1.27865e-97	Mac-E	ATF5
952	4.62578e-99	0.931225	0.739	0.157	1.51439e-94	Mac-E	SRGAP1
953	1.44571e-96	0.897284	0.633	0.116	4.73297e-92	Mac-E	TRIP10
954	1.67198e-96	1.12558	0.826	0.223	5.47372e-92	Mac-E	CLEC10A
955	4.45006e-95	0.933355	0.845	0.226	1.45686e-90	Mac-E	EDEM1
956	4.0379e-94	0.898399	0.459	0.056	1.32193e-89	Mac-E	GPR157
957	2.49006e-93	-2.47783	0.111	0.875	8.15197e-89	Mac-E	S100A9
958	9.52734e-93	1.26463	0.802	0.219	3.11906e-88	Mac-E	MIR155HG
959	2.27853e-90	1.06607	0.865	0.284	7.45946e-86	Mac-E	DUSP5
960	8.99086e-90	1.01415	1	0.471	2.94343e-85	Mac-E	HLA.DQA1
961	1.81487e-89	0.746573	0.493	0.066	5.94151e-85	Mac-E	C10orf128
962	2.20337e-88	1.02866	0.884	0.296	7.2134e-84	Mac-E	TRAF1
963	5.29774e-87	0.976428	0.894	0.304	1.73438e-82	Mac-E	NFKBID
964	1.1562e-86	0.96042	1	0.538	3.78516e-82	Mac-E	HLA.DQB1
965	1.80214e-85	1.10662	0.884	0.3	5.89983e-81	Mac-E	RGCC
966	9.27662e-85	0.900016	0.908	0.334	3.03698e-80	Mac-E	LSP1
967	1.61848e-84	0.99704	0.797	0.226	5.29858e-80	Mac-E	ATP1B1
968	4.56273e-84	1.05141	0.845	0.328	1.49375e-79	Mac-E	STK4
969	9.48126e-83	0.840669	0.686	0.147	3.10398e-78	Mac-E	CD9
970	1.20709e-82	1.01723	0.845	0.272	3.95176e-78	Mac-E	REV3L
971	7.08262e-82	0.941596	0.812	0.243	2.31871e-77	Mac-E	ETV3
972	7.49628e-82	0.928241	0.884	0.318	2.45413e-77	Mac-E	CSF2RA
973	2.39641e-81	0.732238	0.628	0.125	7.84535e-77	Mac-E	ADAM28
974	7.9503e-81	0.863932	1	0.512	2.60277e-76	Mac-E	REL
975	1.7918e-78	0.860153	0.792	0.237	5.866e-74	Mac-E	CHST11
976	2.22393e-78	0.912946	0.87	0.309	7.2807e-74	Mac-E	RAPGEF1
977	5.05454e-78	0.997676	0.889	0.346	1.65476e-73	Mac-E	MIR29A
978	2.84901e-77	1.00956	0.923	0.388	9.3271e-73	Mac-E	TNFAIP8
979	2.71038e-76	0.863936	0.845	0.295	8.87325e-72	Mac-E	AMICA1
980	3.44659e-76	0.847543	0.758	0.224	1.12834e-71	Mac-E	MALT1
981	5.55812e-76	0.922783	0.932	0.459	1.81962e-71	Mac-E	EZR
982	1.26408e-75	0.836321	0.995	0.479	4.13835e-71	Mac-E	NFKB1
983	2.72534e-75	0.913208	0.826	0.251	8.92221e-71	Mac-E	CXCR4
984	8.71967e-74	0.736133	0.662	0.162	2.85464e-69	Mac-E	EIF2AK4
985	1.63238e-73	0.874134	0.575	0.121	5.34409e-69	Mac-E	RUNX3
986	2.01323e-73	0.861703	0.99	0.531	6.5909e-69	Mac-E	GPR183
987	3.67106e-73	0.972762	0.734	0.221	1.20183e-68	Mac-E	CD40
988	4.37965e-71	0.797843	0.792	0.25	1.43381e-66	Mac-E	PDE4A
989	6.85913e-71	0.98431	0.831	0.303	2.24554e-66	Mac-E	VEGFA
990	8.34732e-71	0.72202	0.512	0.096	2.73274e-66	Mac-E	BANP
991	2.93545e-70	0.87169	0.952	0.451	9.61007e-66	Mac-E	INSIG1
992	3.00857e-69	0.913599	0.522	0.101	9.84946e-65	Mac-E	MMP9
993	5.90656e-69	0.984224	0.488	0.085	1.93369e-64	Mac-E	TCHH
994	6.47977e-69	0.876655	0.705	0.208	2.12135e-64	Mac-E	PTGER4
995	1.43693e-68	-2.41697	0.019	0.725	4.70423e-64	Mac-E	S100A8
996	1.56278e-68	0.808011	0.604	0.141	5.11624e-64	Mac-E	RASGRP3
997	3.21057e-67	0.871814	0.894	0.412	1.05108e-62	Mac-E	MAFF
998	8.56403e-67	0.941013	0.812	0.261	2.80369e-62	Mac-E	IL1R2
999	9.9648e-67	0.916321	0.507	0.101	3.26227e-62	Mac-E	TNFSF9
1000	1.63308e-66	0.726508	0.56	0.122	5.34637e-62	Mac-E	TCOF1
1001	8.34121e-65	0.757703	0.952	0.498	2.73075e-60	Mac-E	CFLAR
1002	8.41431e-64	0.838943	0.618	0.167	2.75468e-59	Mac-E	SATB1
1003	1.16092e-63	0.92743	0.652	0.188	3.80062e-59	Mac-E	LDLRAD4
1004	2.56952e-63	0.79624	0.807	0.274	8.41211e-59	Mac-E	RP11.138A9.2
1005	3.1581e-63	0.750995	0.923	0.384	1.0339e-58	Mac-E	MAT2A
1006	9.14917e-63	0.764903	0.976	0.475	2.99526e-58	Mac-E	SERPINB9
1007	2.63825e-62	0.785774	0.928	0.422	8.6371e-58	Mac-E	SPAG9
1008	1.73043e-61	0.785804	0.812	0.314	5.66508e-57	Mac-E	MBP
1009	2.29875e-61	0.891578	0.671	0.21	7.52564e-57	Mac-E	TPRA1
1010	1.08437e-60	0.800948	0.86	0.27	3.55002e-56	Mac-E	RGS1
1011	1.5358e-60	0.801215	0.908	0.405	5.02792e-56	Mac-E	OGFRL1
1012	1.59892e-60	0.762267	0.705	0.232	5.23455e-56	Mac-E	RALA
1013	3.58217e-60	0.80232	0.589	0.156	1.17273e-55	Mac-E	KCNN4
1014	1.92772e-59	0.817914	0.691	0.218	6.31098e-55	Mac-E	UGCG
1015	2.2099e-59	0.847114	0.739	0.22	7.23477e-55	Mac-E	AREG
1016	2.43527e-59	0.970906	0.865	0.395	7.97258e-55	Mac-E	TNF
1017	2.50801e-59	0.821668	0.918	0.405	8.21071e-55	Mac-E	BASP1
1018	5.2213e-59	0.718284	0.628	0.173	1.70935e-54	Mac-E	CLN8
1019	8.57216e-59	0.744701	0.845	0.326	2.80635e-54	Mac-E	PHACTR1
1020	3.67625e-58	0.828693	0.783	0.278	1.20353e-53	Mac-E	GPR132
1021	5.21e-58	0.734182	0.913	0.422	1.70565e-53	Mac-E	CHD2
1022	3.15578e-57	0.794055	0.884	0.379	1.03314e-52	Mac-E	SGK1
1023	8.35614e-56	-1.40405	0.314	0.792	2.73563e-51	Mac-E	CD14
1024	1.21441e-55	0.720715	0.85	0.358	3.97574e-51	Mac-E	FNBP1
1025	1.38084e-55	0.725025	0.551	0.143	4.52058e-51	Mac-E	SLC25A19
1026	6.64803e-55	0.713938	0.628	0.181	2.17643e-50	Mac-E	CD84
1027	8.05961e-55	0.708204	0.575	0.152	2.63856e-50	Mac-E	CASC7
1028	1.39645e-54	0.83486	0.889	0.391	4.5717e-50	Mac-E	LMNA
1029	1.786e-54	0.851692	0.657	0.219	5.847e-50	Mac-E	RAB11FIP1
1030	1.99801e-54	0.821744	0.865	0.379	6.54108e-50	Mac-E	BIRC3
1031	8.77752e-54	0.71052	0.942	0.49	2.87358e-49	Mac-E	HLA.DMA
1032	2.65904e-53	0.718177	0.778	0.297	8.70517e-49	Mac-E	LPXN
1033	2.83516e-53	-2.35666	0.082	0.657	9.28174e-49	Mac-E	RNASE1
1034	5.13079e-53	0.703791	0.865	0.358	1.67972e-48	Mac-E	FCGR2B
1035	7.8887e-53	0.703838	0.662	0.217	2.5826e-48	Mac-E	CEP170
1036	9.53635e-53	0.796241	0.667	0.228	3.12201e-48	Mac-E	RANBP2
1037	3.90359e-52	0.702511	0.435	0.093	1.27796e-47	Mac-E	TRAF4
1038	1.04173e-51	0.7077	0.797	0.314	3.41042e-47	Mac-E	HEXIM1
1039	1.59317e-51	0.695889	0.908	0.42	5.21572e-47	Mac-E	KMT2E
1040	3.59538e-51	0.782465	0.754	0.299	1.17706e-46	Mac-E	CDC42EP3
1041	4.19918e-51	0.82647	0.749	0.303	1.37473e-46	Mac-E	MAP4K4
1042	9.43052e-51	0.694798	0.585	0.172	3.08736e-46	Mac-E	SPHK1
1043	3.28245e-50	-0.869034	0.734	0.888	1.07461e-45	Mac-E	GLUL
1044	5.68487e-50	-1.31488	0.425	0.77	1.86111e-45	Mac-E	CTSD
1045	7.39165e-49	0.727395	0.599	0.187	2.41988e-44	Mac-E	DENND4A
1046	1.23014e-48	0.852477	0.643	0.2	4.02722e-44	Mac-E	CCL3L1
1047	4.37543e-48	-1.57525	0.329	0.721	1.43243e-43	Mac-E	C1QC
1048	5.67958e-46	0.699316	0.686	0.253	1.85938e-41	Mac-E	INTS6
1049	1.88927e-44	-1.35316	0.459	0.745	6.18511e-40	Mac-E	C1QB
1050	1.54906e-43	-1.18834	0.56	0.78	5.07131e-39	Mac-E	C1QA
1051	8.92802e-43	0.76806	0.691	0.264	2.92286e-38	Mac-E	RBBP8
1052	2.31053e-42	0.698472	0.744	0.326	7.56421e-38	Mac-E	BCAS2
1053	4.69438e-42	-2.09103	0.092	0.587	1.53685e-37	Mac-E	PLTP
1054	8.45399e-41	0.762505	0.831	0.379	2.76767e-36	Mac-E	G0S2
1055	1.05149e-38	0.771859	0.464	0.134	3.44236e-34	Mac-E	RPPH1
1056	1.1227e-38	0.805958	0.44	0.123	3.67549e-34	Mac-E	TNFSF14
1057	1.5643e-38	-2.12944	0.048	0.531	5.12122e-34	Mac-E	SEPP1
1058	3.28654e-38	0.699007	0.556	0.183	1.07595e-33	Mac-E	SLAMF7
1059	1.50191e-37	0.864915	0.676	0.285	4.91696e-33	Mac-E	IL1A
1060	5.96267e-36	-1.14733	0.372	0.688	1.95206e-31	Mac-E	FCGR3A
1061	1.36438e-35	-1.29758	0.329	0.656	4.4667e-31	Mac-E	CFD
1062	4.14694e-35	-1.88236	0.014	0.477	1.35763e-30	Mac-E	LYVE1
1063	2.34265e-32	-1.26685	0.15	0.556	7.66936e-28	Mac-E	SLA
1064	2.10511e-31	-1.53789	0.097	0.513	6.89172e-27	Mac-E	TMEM176B
1065	5.09046e-31	-1.04092	0.594	0.739	1.66651e-26	Mac-E	CD163
1066	2.8358e-29	-1.13351	0.121	0.52	9.28384e-25	Mac-E	SLC11A1
1067	8.36103e-29	-1.67173	0.097	0.484	2.73723e-24	Mac-E	FOLR2
1068	3.2859e-27	0.779156	0.271	0.065	1.07574e-22	Mac-E	LY6K
1069	1.80546e-26	-1.14368	0.106	0.503	5.91073e-22	Mac-E	RPS4Y1
1070	1.91336e-26	-0.859768	0.768	0.837	6.26395e-22	Mac-E	TUBA1B
1071	9.3155e-26	-1.20615	0.087	0.451	3.04971e-21	Mac-E	FCGR1A
1072	9.63461e-26	-0.795421	0.633	0.726	3.15418e-21	Mac-E	ACSL1
1073	8.40813e-25	-1.14854	0.251	0.56	2.75265e-20	Mac-E	THBS1
1074	1.25419e-24	-0.930755	0.633	0.732	4.10597e-20	Mac-E	MS4A4A
1075	2.12203e-23	-1.36502	0.058	0.406	6.94711e-19	Mac-E	TMEM176A
1076	5.33328e-22	-1.18651	0.029	0.357	1.74601e-17	Mac-E	AQP9
1077	8.80192e-22	-1.15141	0.401	0.625	2.88157e-17	Mac-E	TXNIP
1078	1.97149e-21	-0.879359	0.657	0.738	6.45427e-17	Mac-E	BLVRB
1079	2.85335e-21	-1.01079	0.329	0.562	9.34128e-17	Mac-E	AGFG1
1080	2.86683e-21	-1.24572	0.271	0.54	9.38543e-17	Mac-E	PDIA4
1081	6.20284e-21	-0.887135	0.594	0.701	2.03068e-16	Mac-E	PDIA6
1082	1.90189e-20	-0.917504	0.053	0.365	6.2264e-16	Mac-E	LDLR
1083	3.36069e-20	-0.788348	0.691	0.721	1.10022e-15	Mac-E	CTSC
1084	4.58173e-20	-0.952377	0.097	0.407	1.49997e-15	Mac-E	PYGL
1085	6.02231e-20	-1.15797	0.063	0.376	1.97158e-15	Mac-E	VCAN
1086	6.11158e-20	-1.08059	0.01	0.313	2.00081e-15	Mac-E	RBP7
1087	6.79111e-20	-0.935296	0.01	0.315	2.22327e-15	Mac-E	NPL
1088	3.94198e-18	-0.803408	0.599	0.678	1.29053e-13	Mac-E	HSBP1
1089	4.51014e-17	-1.17386	0.527	0.615	1.47653e-12	Mac-E	F13A1
1090	6.26188e-17	-1.01147	0.246	0.483	2.05002e-12	Mac-E	CNIH4
1091	1.05779e-16	-0.716725	0.024	0.292	3.46301e-12	Mac-E	DMXL2
1092	1.22688e-16	-0.915534	0.087	0.361	4.01655e-12	Mac-E	DDX3Y
1093	2.6306e-16	-0.878534	0.082	0.344	8.61205e-12	Mac-E	CD300E
1094	3.94591e-16	-0.720312	0.691	0.732	1.29181e-11	Mac-E	AP2S1
1095	7.47429e-16	-1.07353	0.13	0.389	2.44693e-11	Mac-E	STAB1
1096	1.3474e-15	-1.15665	0.092	0.354	4.41111e-11	Mac-E	MT1X
1097	1.99619e-15	-0.716745	0.541	0.629	6.53511e-11	Mac-E	FPR1
1098	2.28929e-15	-0.841809	0.357	0.565	7.49467e-11	Mac-E	HMOX1
1099	6.25994e-15	-1.11206	0.058	0.308	2.04938e-10	Mac-E	TNFAIP6
1100	6.38044e-15	-1.15493	0.14	0.386	2.08883e-10	Mac-E	DAB2
1101	7.11675e-15	-0.92592	0.101	0.348	2.32988e-10	Mac-E	RP11.290F20.3
1102	9.03309e-15	-1.08762	0.068	0.311	2.95725e-10	Mac-E	FCN1
1103	1.028e-14	-0.873343	0.019	0.257	3.36546e-10	Mac-E	DNAAF1
1104	2.9012e-14	-0.920063	0.034	0.274	9.49796e-10	Mac-E	SLC1A3
1105	1.32167e-13	-0.81179	0.493	0.587	4.32688e-09	Mac-E	GCA
1106	1.78623e-13	-0.725944	0.058	0.292	5.84777e-09	Mac-E	TCN2
1107	4.35009e-13	-0.787754	0.193	0.416	1.42413e-08	Mac-E	AGTRAP
1108	8.75571e-13	-0.857188	0.338	0.511	2.86644e-08	Mac-E	CALM3
1109	1.13088e-12	-0.755423	0.29	0.487	3.70227e-08	Mac-E	CLEC4E
1110	1.13428e-12	-0.756358	0.522	0.615	3.71342e-08	Mac-E	P4HB
1111	1.1919e-12	-0.726061	0.676	0.7	3.90206e-08	Mac-E	CLTA
1112	1.61229e-12	-0.942699	0.063	0.279	5.27831e-08	Mac-E	IDH1
1113	1.93488e-12	-0.722022	0.266	0.475	6.33441e-08	Mac-E	C3AR1
1114	5.91302e-12	-0.803603	0.449	0.572	1.9358e-07	Mac-E	SDF2L1
1115	5.94581e-12	-0.760381	0.072	0.289	1.94654e-07	Mac-E	HOMER3
1116	1.50648e-11	-1.02941	0.077	0.282	4.93191e-07	Mac-E	GPR34
1117	1.94925e-11	-0.69798	0.599	0.652	6.38146e-07	Mac-E	LAMP1
1118	2.89309e-11	-1.05304	0.164	0.361	9.47141e-07	Mac-E	PDK4
1119	1.51004e-10	-0.75287	0.556	0.612	4.94358e-06	Mac-E	MANF
1120	1.78011e-10	-0.728401	0.382	0.493	5.82773e-06	Mac-E	HCK
1121	5.98011e-10	-0.806441	0.193	0.373	1.95777e-05	Mac-E	BLVRA
1122	6.1446e-10	-0.757838	0.246	0.422	2.01162e-05	Mac-E	HNMT
1123	7.77271e-10	-0.900008	0.357	0.498	2.54463e-05	Mac-E	PLD3
1124	1.1543e-09	-0.803191	0.488	0.554	3.77894e-05	Mac-E	SNX6
1125	1.54091e-09	-0.766743	0.087	0.265	5.04463e-05	Mac-E	GIMAP4
1126	6.61741e-09	-0.708154	0.203	0.36	0.000216641	Mac-E	LILRA5
1127	1.18783e-08	-0.837641	0.145	0.315	0.000388872	Mac-E	MAF
1128	1.57773e-08	-0.736544	0.3	0.446	0.000516516	Mac-E	NCF4
1129	4.01439e-08	-0.775228	0.406	0.504	0.00131423	Mac-E	TMED9
1130	1.97082e-07	-0.730818	0.435	0.504	0.00645207	Mac-E	CREG1
1131	5.94294e-07	-0.775404	0.618	0.589	0.019456	Mac-E	KLF2
1132	6.77589e-07	-0.831887	0.319	0.438	0.0221829	Mac-E	GYPC
1133	1.33559e-06	-0.908738	0.155	0.279	0.0437246	Mac-E	SLCO2B1
1134	2.47007e-06	-0.767985	0.184	0.312	0.0808653	Mac-E	SCN1B
1135	1.57951e-05	-0.737984	0.222	0.324	0.517099	Mac-E	CRELD2
1136	0.000165923	-0.710714	0.353	0.417	1	Mac-E	RAB13

## Sheet: Mac-A
	p_val	avg_logFC	pct.1	pct.2	p_val_adj	cluster	gene
1	0	1.78217	0.887	0.372	0	Mac-A	RNASE1
79	8.01921e-259	1.72928	0.785	0.237	2.62533e-254	Mac-A	SEPP1
57	1.08958e-276	1.68546	0.825	0.306	3.56707e-272	Mac-A	PLTP
326	2.50817e-153	1.53234	0.644	0.286	8.21125e-149	Mac-A	FOLR2
147	4.69986e-225	1.43189	0.803	0.436	1.53864e-220	Mac-A	F13A1
2	0	1.35299	0.931	0.479	0	Mac-A	C1QC
3	0	1.33166	0.948	0.525	0	Mac-A	C1QB
391	2.77825e-51	1.29141	0.435	0.265	9.09542e-47	Mac-A	PMP22
357	4.443e-133	1.276	0.622	0.284	1.45455e-128	Mac-A	LYVE1
378	7.45892e-91	1.27358	0.584	0.391	2.4419e-86	Mac-A	TMEM176B
389	2.87684e-58	1.25379	0.473	0.298	9.4182e-54	Mac-A	TMEM176A
4	0	1.2126	0.951	0.597	0	Mac-A	C1QA
42	1.66745e-290	1.20042	0.895	0.776	5.45891e-286	Mac-A	TUBA1B
395	6.46059e-33	1.17098	0.34	0.202	2.11507e-28	Mac-A	GPR34
374	2.47851e-96	1.09553	0.664	0.558	8.11414e-92	Mac-A	TXNIP
397	8.57147e-29	1.06534	0.449	0.403	2.80613e-24	Mac-A	AKR1B1
402	9.92067e-19	1.05992	0.365	0.307	3.24783e-14	Mac-A	MT1X
403	2.32093e-17	1.04333	0.424	0.435	7.59825e-13	Mac-A	GYPC
396	4.45148e-32	1.04296	0.255	0.107	1.45733e-27	Mac-A	CD209
385	1.92467e-69	1.0373	0.568	0.438	6.30098e-65	Mac-A	ALOX5AP
399	4.15071e-26	1.02459	0.408	0.332	1.35886e-21	Mac-A	DAB2
363	1.87352e-124	1.0026	0.714	0.615	6.13352e-120	Mac-A	VSIG4
405	2.88241e-15	0.949341	0.427	0.461	9.43642e-11	Mac-A	PEBP1
398	1.25019e-26	0.921325	0.505	0.533	4.09286e-22	Mac-A	PDIA4
381	4.10435e-82	0.90637	0.681	0.777	1.34368e-77	Mac-A	BLVRB
392	3.81526e-50	0.894311	0.622	0.766	1.24904e-45	Mac-A	CLTA
406	5.96916e-15	0.867296	0.367	0.327	1.95418e-10	Mac-A	PDK4
384	9.17662e-79	0.855269	0.677	0.768	3.00424e-74	Mac-A	MS4A4A
404	3.60673e-16	0.847813	0.481	0.58	1.18077e-11	Mac-A	TUBB
386	2.45043e-68	0.844631	0.661	0.789	8.02221e-64	Mac-A	AP2S1
408	1.48018e-08	0.844374	0.431	0.538	0.000484582	Mac-A	PLD3
366	1.45109e-114	0.828021	0.738	0.855	4.75056e-110	Mac-A	VAMP8
393	1.15334e-48	0.811204	0.613	0.72	3.7758e-44	Mac-A	CD81
400	1.51443e-23	0.801123	0.502	0.554	4.95793e-19	Mac-A	SAP30
387	3.67706e-59	0.795447	0.654	0.733	1.20379e-54	Mac-A	RGS2
50	9.03193e-283	0.743508	0.92	0.925	2.95687e-278	Mac-A	IFITM3
375	7.68396e-95	0.740452	0.723	0.876	2.51557e-90	Mac-A	SNX3
394	7.28986e-38	0.730915	0.603	0.773	2.38656e-33	Mac-A	PDIA6
291	1.39365e-169	0.725114	0.81	0.906	4.56252e-165	Mac-A	C1orf162
409	1.68439e-08	0.719861	0.289	0.253	0.000551437	Mac-A	SLCO2B1
5	0	0.718953	0.94	0.945	0	Mac-A	GPX1
388	7.52856e-59	0.71292	0.664	0.865	2.4647e-54	Mac-A	PPIB
401	4.05825e-20	0.706923	0.562	0.805	1.32859e-15	Mac-A	POLR2L
390	2.01938e-54	0.702114	0.651	0.835	6.61104e-50	Mac-A	NDUFA4
261	5.452e-180	0.698344	0.823	0.923	1.78488e-175	Mac-A	NPC2
407	1.83044e-12	0.696636	0.508	0.697	5.99248e-08	Mac-A	MANF
235	1.10917e-190	-0.693565	0.041	0.614	3.63119e-186	Mac-A	STAG2
274	5.25526e-175	-0.694886	0.059	0.624	1.72047e-170	Mac-A	NBN
150	7.71018e-224	-0.695435	0.067	0.746	2.52416e-219	Mac-A	FMNL1
313	2.89189e-161	-0.695839	0.134	0.757	9.46746e-157	Mac-A	NR4A2
296	1.29702e-166	-0.697839	0.03	0.535	4.24617e-162	Mac-A	IRF7
277	5.9965e-173	-0.697843	0.056	0.612	1.96313e-168	Mac-A	MBP
332	1.00008e-151	-0.699833	0.026	0.491	3.27405e-147	Mac-A	EDEM1
279	2.15827e-172	-0.700224	0.037	0.565	7.06574e-168	Mac-A	RBBP6
362	1.154e-126	-0.700848	0.035	0.452	3.77797e-122	Mac-A	LILRB1
361	1.0843e-128	-0.701223	0.006	0.385	3.54977e-124	Mac-A	KCNE1
337	2.12267e-146	-0.701246	0.015	0.449	6.94921e-142	Mac-A	SORL1
371	2.33767e-105	-0.702068	0.006	0.327	7.65307e-101	Mac-A	RASGRP3
268	1.81659e-176	-0.704272	0.045	0.594	5.94715e-172	Mac-A	AMICA1
290	1.15841e-169	-0.704312	0.016	0.505	3.79239e-165	Mac-A	C16orf72
319	1.26717e-158	-0.706302	0.022	0.495	4.14846e-154	Mac-A	ZCCHC6
321	1.16054e-156	-0.706342	0.033	0.52	3.79938e-152	Mac-A	SAV1
225	6.56145e-193	-0.707768	0.041	0.62	2.14809e-188	Mac-A	MAP3K2
352	1.09684e-136	-0.707897	0.253	0.91	3.59083e-132	Mac-A	S100A10
243	1.56817e-186	-0.708484	0.038	0.597	5.13388e-182	Mac-A	CD58
350	8.92669e-138	-0.709854	0.057	0.532	2.92242e-133	Mac-A	CCDC71L
379	2.07103e-90	-0.710649	0.008	0.292	6.78012e-86	Mac-A	RPPH1
238	2.18512e-189	-0.711034	0.049	0.632	7.15364e-185	Mac-A	PHF20L1
295	2.14336e-167	-0.711539	0.02	0.509	7.01694e-163	Mac-A	SLC6A6
256	4.57695e-182	-0.711758	0.062	0.645	1.4984e-177	Mac-A	KLF10
282	5.68265e-172	-0.71406	0.022	0.527	1.86039e-167	Mac-A	PRKAG2
327	5.71377e-153	-0.714215	0.009	0.45	1.87057e-148	Mac-A	DOT1L
355	4.73817e-134	-0.714625	0.008	0.402	1.55118e-129	Mac-A	LINC00877
297	2.21776e-166	-0.715994	0.022	0.515	7.26051e-162	Mac-A	PCF11
318	9.25012e-159	-0.717548	0.017	0.483	3.02831e-154	Mac-A	MALT1
255	3.70405e-182	-0.721795	0.066	0.656	1.21263e-177	Mac-A	PDE4DIP
197	3.79304e-205	-0.722122	0.044	0.652	1.24177e-200	Mac-A	C9orf72
306	1.09617e-163	-0.722746	0.015	0.49	3.58865e-159	Mac-A	NOTCH2
283	1.5015e-171	-0.723354	0.12	0.751	4.9156e-167	Mac-A	PPIF
341	3.1632e-144	-0.724149	0.02	0.458	1.03557e-139	Mac-A	RAB11FIP1
351	2.92593e-137	-0.725042	0.002	0.392	9.57892e-133	Mac-A	NCR3LG1
186	1.3596e-208	-0.726103	0.029	0.62	4.45105e-204	Mac-A	RELB
322	9.10228e-156	-0.72658	0.217	0.916	2.97991e-151	Mac-A	SOCS3
236	3.21723e-190	-0.726777	0.062	0.664	1.05326e-185	Mac-A	FGD4
372	3.60631e-103	-0.727839	0.005	0.317	1.18063e-98	Mac-A	AGPAT9
364	6.56621e-120	-0.728123	0.027	0.418	2.14965e-115	Mac-A	RP11.386I14.4
369	2.63042e-111	-0.729513	0.007	0.344	8.61148e-107	Mac-A	ZBTB10
302	1.87562e-165	-0.731567	0.065	0.615	6.14041e-161	Mac-A	PMAIP1
320	4.65838e-158	-0.731958	0.193	0.871	1.52506e-153	Mac-A	DUSP2
292	1.99448e-168	-0.734963	0.461	0.988	6.52954e-164	Mac-A	SOD2
264	9.78556e-178	-0.735303	0.037	0.577	3.2036e-173	Mac-A	NDRG1
312	5.33996e-162	-0.736787	0.243	0.947	1.7482e-157	Mac-A	SQSTM1
160	2.32801e-219	-0.737854	0.056	0.711	7.62145e-215	Mac-A	TRA2A
317	6.74092e-159	-0.738204	0.022	0.498	2.20684e-154	Mac-A	RB1CC1
278	1.94822e-172	-0.73918	0.022	0.524	6.37807e-168	Mac-A	GPATCH2L
324	5.84337e-154	-0.740525	0.093	0.647	1.913e-149	Mac-A	PHLDA2
376	1.19396e-92	-0.742368	0	0.277	3.90879e-88	Mac-A	TNFSF14
285	4.71421e-171	-0.742457	0.111	0.733	1.54334e-166	Mac-A	UBE2D1
359	2.04341e-130	-0.743797	0.006	0.388	6.68971e-126	Mac-A	SNORD3D
307	1.29316e-163	-0.74474	0.058	0.593	4.23355e-159	Mac-A	WARS
367	2.50983e-113	-0.745722	0.006	0.347	8.21667e-109	Mac-A	SELL
373	1.34703e-96	-0.746089	0.045	0.4	4.40991e-92	Mac-A	CCL3L1
202	1.05932e-203	-0.746152	0.086	0.749	3.46799e-199	Mac-A	RBM47
254	3.21497e-182	-0.748531	0.043	0.603	1.05252e-177	Mac-A	AHR
347	3.83433e-139	-0.749092	0.282	0.941	1.25528e-134	Mac-A	CD44
219	1.75054e-196	-0.749105	0.051	0.65	5.73091e-192	Mac-A	FOXO3
244	4.01607e-186	-0.75032	0.033	0.584	1.31478e-181	Mac-A	SMCHD1
299	3.50177e-166	-0.751704	0.034	0.543	1.14641e-161	Mac-A	N4BP1
370	5.34588e-106	-0.753126	0.053	0.442	1.75014e-101	Mac-A	AREG
335	4.48806e-148	-0.753477	0.101	0.651	1.4693e-143	Mac-A	THBD
229	1.0977e-191	-0.754201	0.174	0.917	3.59365e-187	Mac-A	PTPRE
161	6.14046e-219	-0.754691	0.047	0.688	2.01026e-214	Mac-A	CPEB4
232	2.83647e-191	-0.755616	0.019	0.558	9.28605e-187	Mac-A	ZFC3H1
218	1.44708e-196	-0.762418	0.034	0.609	4.73745e-192	Mac-A	OXSR1
241	2.9186e-187	-0.76413	0.039	0.602	9.55492e-183	Mac-A	TRIB1
309	1.06921e-162	-0.764799	0.008	0.47	3.50038e-158	Mac-A	CLEC12A
203	4.02393e-203	-0.766157	0.037	0.63	1.31735e-198	Mac-A	HBP1
153	3.81737e-222	-0.766863	0.05	0.701	1.24973e-217	Mac-A	JOSD1
179	1.39886e-211	-0.767137	0.129	0.865	4.57959e-207	Mac-A	ZFAND5
265	1.50311e-177	-0.76835	0.053	0.614	4.92087e-173	Mac-A	RAPGEF1
340	2.03472e-144	-0.769747	0.035	0.497	6.66127e-140	Mac-A	PAPSS2
294	9.35417e-168	-0.769988	0.029	0.531	3.06237e-163	Mac-A	NXF1
368	3.48051e-112	-0.770202	0.007	0.346	1.13945e-107	Mac-A	C19orf59
328	1.67579e-152	-0.776015	0.268	0.975	5.48619e-148	Mac-A	PPP1R15A
284	3.34554e-171	-0.776118	0.052	0.601	1.09526e-166	Mac-A	LTA4H
280	5.32031e-172	-0.776667	0.046	0.586	1.74176e-167	Mac-A	PELI1
233	6.37098e-191	-0.780996	0.168	0.892	2.08573e-186	Mac-A	CDKN1A
289	5.70982e-170	-0.781098	0.022	0.519	1.86928e-165	Mac-A	INTS6
271	2.76546e-176	-0.781253	0.008	0.498	9.05357e-172	Mac-A	SIK3
298	2.30762e-166	-0.78313	0.029	0.528	7.5547e-162	Mac-A	RALGDS
269	2.00396e-176	-0.784828	0.012	0.509	6.56056e-172	Mac-A	TP53BP2
334	1.65158e-148	-0.787781	0.007	0.433	5.40696e-144	Mac-A	MFSD2A
258	5.71978e-181	-0.788042	0.015	0.528	1.87254e-176	Mac-A	RELT
198	1.38975e-204	-0.788709	0.042	0.645	4.54976e-200	Mac-A	CCDC88A
343	3.86822e-143	-0.788926	0.215	0.828	1.26638e-138	Mac-A	CCL3
184	7.15082e-210	-0.791387	0.116	0.824	2.34103e-205	Mac-A	TAOK3
206	1.358e-202	-0.791645	0.042	0.64	4.44581e-198	Mac-A	CYLD
208	1.29608e-201	-0.792387	0.039	0.627	4.24312e-197	Mac-A	TNIP1
252	2.16536e-183	-0.79329	0.212	0.947	7.08896e-179	Mac-A	SRSF5
196	1.11605e-205	-0.79372	0.049	0.664	3.65372e-201	Mac-A	SKIL
308	5.53045e-163	-0.796984	0.048	0.57	1.81056e-158	Mac-A	GBP1
331	6.98219e-152	-0.798875	0.012	0.453	2.28583e-147	Mac-A	RN7SL1
247	2.37407e-185	-0.8	0.027	0.566	7.77223e-181	Mac-A	MACF1
213	1.74027e-200	-0.801295	0.032	0.609	5.6973e-196	Mac-A	SNN
248	5.527e-185	-0.801334	0.023	0.555	1.80943e-180	Mac-A	ZBTB1
310	1.09911e-162	-0.805861	0.263	0.966	3.59828e-158	Mac-A	MCL1
152	9.39904e-223	-0.808321	0.103	0.823	3.07706e-218	Mac-A	MIDN
275	7.24332e-175	-0.808516	0.019	0.524	2.37132e-170	Mac-A	AKAP9
143	4.60277e-227	-0.808716	0.049	0.705	1.50685e-222	Mac-A	PNISR
138	3.97865e-229	-0.81066	0.139	0.918	1.30253e-224	Mac-A	PRRC2C
266	3.3652e-177	-0.81115	0.012	0.509	1.1017e-172	Mac-A	LFNG
344	7.29608e-143	-0.812425	0.007	0.42	2.38859e-138	Mac-A	SFMBT2
217	1.38862e-197	-0.81258	0.033	0.608	4.54606e-193	Mac-A	TLE4
155	1.10595e-220	-0.812661	0.032	0.651	3.62067e-216	Mac-A	EPC1
173	1.23433e-214	-0.813209	0.029	0.631	4.04094e-210	Mac-A	POLR2A
223	1.5224e-193	-0.814173	0.03	0.591	4.98404e-189	Mac-A	ZBTB7A
382	1.82404e-81	-0.815395	0.003	0.255	5.97153e-77	Mac-A	TEX14
216	9.90501e-198	-0.816594	0.021	0.576	3.2427e-193	Mac-A	JARID2
246	2.17172e-185	-0.817745	0.007	0.514	7.10976e-181	Mac-A	TNFRSF10B
193	3.60665e-207	-0.818654	0.034	0.627	1.18075e-202	Mac-A	SERPINB8
300	3.88292e-166	-0.818742	0.246	0.954	1.27119e-161	Mac-A	FOSB
165	1.35202e-216	-0.819912	0.147	0.901	4.42625e-212	Mac-A	MGAT1
242	3.60747e-187	-0.820547	0.034	0.588	1.18101e-182	Mac-A	ISG20
192	2.47368e-207	-0.820761	0.042	0.649	8.09832e-203	Mac-A	ARL4A
251	5.46015e-184	-0.821266	0.015	0.534	1.78754e-179	Mac-A	ITGA5
212	1.48276e-200	-0.824009	0.026	0.597	4.85427e-196	Mac-A	DENND5A
281	5.45755e-172	-0.826579	0.025	0.534	1.78669e-167	Mac-A	MARCKSL1
149	2.07018e-224	-0.826827	0.058	0.722	6.77737e-220	Mac-A	NUFIP2
194	2.77515e-206	-0.828236	0.032	0.623	9.08529e-202	Mac-A	ARID4B
124	1.51314e-237	-0.829739	0.051	0.73	4.95372e-233	Mac-A	CLK1
276	1.37534e-174	-0.83108	0.015	0.513	4.5026e-170	Mac-A	TSC22D2
354	9.63386e-136	-0.833341	0.002	0.391	3.15393e-131	Mac-A	FAM65B
126	2.8758e-236	-0.83444	0.048	0.721	9.41479e-232	Mac-A	AFF4
239	2.05183e-188	-0.834618	0.054	0.64	6.71729e-184	Mac-A	IGSF6
220	6.54421e-196	-0.836861	0.032	0.601	2.14244e-191	Mac-A	ZFYVE16
187	1.89196e-208	-0.838198	0.164	0.913	6.19389e-204	Mac-A	DDX3X
191	2.026e-207	-0.840102	0.025	0.606	6.63272e-203	Mac-A	PURB
145	5.29131e-227	-0.842293	0.058	0.728	1.73227e-222	Mac-A	BHLHE40
115	2.23921e-241	-0.843918	0.063	0.769	7.33072e-237	Mac-A	IL10RA
133	7.13898e-234	-0.843947	0.042	0.699	2.33716e-229	Mac-A	STK10
180	1.8702e-211	-0.844255	0.174	0.938	6.12267e-207	Mac-A	LRRFIP1
311	1.65102e-162	-0.846092	0.009	0.471	5.40512e-158	Mac-A	MLTK
129	1.73666e-235	-0.847393	0.12	0.887	5.68546e-231	Mac-A	IQGAP1
339	6.63972e-146	-0.847789	0.034	0.494	2.17371e-141	Mac-A	OSM
305	6.11829e-164	-0.847824	0.004	0.459	2.00301e-159	Mac-A	KIAA0907
136	5.82376e-230	-0.848709	0.117	0.868	1.90658e-225	Mac-A	AKAP13
272	8.4416e-176	-0.854169	0.214	0.948	2.76361e-171	Mac-A	CD83
330	6.42657e-152	-0.854246	0.063	0.576	2.10393e-147	Mac-A	IL10
167	2.79635e-216	-0.854648	0.1	0.8	9.15468e-212	Mac-A	RNF144B
230	1.28557e-191	-0.856103	0.006	0.525	4.2087e-187	Mac-A	LINC.PINT
170	4.74651e-216	-0.856507	0.089	0.776	1.55391e-211	Mac-A	IER5
190	9.82472e-208	-0.856648	0.128	0.846	3.21642e-203	Mac-A	PFKFB3
224	1.56022e-193	-0.857455	0.082	0.714	5.10785e-189	Mac-A	SGK1
95	1.10075e-251	-0.858267	0.058	0.775	3.60363e-247	Mac-A	GPBP1
316	4.15963e-159	-0.859113	0.063	0.592	1.36178e-154	Mac-A	RGCC
333	1.56718e-148	-0.85981	0.006	0.431	5.13063e-144	Mac-A	PTGER2
245	1.27019e-185	-0.86071	0.012	0.528	4.15834e-181	Mac-A	ETV3
348	1.5311e-138	-0.861248	0.07	0.56	5.01251e-134	Mac-A	RP11.290F20.3
168	2.829e-216	-0.863559	0.116	0.83	9.26158e-212	Mac-A	EZR
263	2.15744e-178	-0.868058	0.072	0.653	7.06302e-174	Mac-A	RP11.1143G9.4
98	7.33248e-251	-0.868355	0.039	0.727	2.40051e-246	Mac-A	MYO9B
128	8.38382e-236	-0.869182	0.13	0.905	2.74469e-231	Mac-A	FOSL2
342	1.12114e-143	-0.870073	0.073	0.578	3.67038e-139	Mac-A	DDX3Y
211	1.13136e-200	-0.872636	0.186	0.936	3.70385e-196	Mac-A	NFE2L2
114	1.88637e-241	-0.872834	0.078	0.802	6.17559e-237	Mac-A	AHNAK
117	1.74407e-240	-0.87341	0.076	0.794	5.70974e-236	Mac-A	IRAK3
237	8.10684e-190	-0.874725	0.004	0.514	2.65402e-185	Mac-A	HIVEP1
182	2.45106e-211	-0.883707	0.032	0.632	8.02429e-207	Mac-A	HEXIM1
323	5.97427e-155	-0.884478	0.055	0.561	1.95586e-150	Mac-A	DNAJA4
262	9.09593e-180	-0.884864	0.258	0.94	2.97783e-175	Mac-A	PLEK
116	4.91935e-241	-0.885438	0.029	0.684	1.6105e-236	Mac-A	CSGALNACT2
346	6.69984e-140	-0.886498	0.018	0.441	2.19339e-135	Mac-A	ZFX
329	3.35671e-152	-0.886541	0.207	0.811	1.09892e-147	Mac-A	CCL4
227	5.42918e-192	-0.886909	0.025	0.573	1.77741e-187	Mac-A	GPR132
158	1.24469e-219	-0.890359	0.042	0.675	4.07488e-215	Mac-A	ANKRD11
175	2.48868e-213	-0.891068	0.075	0.738	8.14745e-209	Mac-A	CHMP1B
210	6.14433e-201	-0.891468	0.017	0.573	2.01153e-196	Mac-A	B4GALT5
134	1.59697e-232	-0.893812	0.042	0.694	5.22816e-228	Mac-A	RYBP
353	2.5548e-136	-0.894559	0.003	0.394	8.3639e-132	Mac-A	SLAMF7
146	8.78697e-227	-0.895184	0.029	0.655	2.87668e-222	Mac-A	TIPARP
273	3.17182e-175	-0.895655	0.005	0.488	1.03839e-170	Mac-A	CYB5D1
287	8.134e-171	-0.895935	0.014	0.5	2.66291e-166	Mac-A	DMXL2
176	9.57162e-213	-0.896355	0.134	0.865	3.13356e-208	Mac-A	RILPL2
200	9.29056e-204	-0.897549	0.183	0.93	3.04154e-199	Mac-A	KLF6
148	1.21187e-224	-0.898515	0.062	0.728	3.96743e-220	Mac-A	PTPN1
207	5.57523e-202	-0.902986	0.004	0.54	1.82522e-197	Mac-A	IRAK2
267	1.24296e-176	-0.905333	0.001	0.478	4.0692e-172	Mac-A	SNORD3B.2
260	6.84417e-181	-0.918486	0.004	0.496	2.24064e-176	Mac-A	MIR24.2
240	6.37229e-188	-0.918543	0.029	0.577	2.08616e-183	Mac-A	PAG1
164	8.3338e-217	-0.920445	0.151	0.902	2.72832e-212	Mac-A	MAP3K8
166	1.45374e-216	-0.920853	0.021	0.614	4.75927e-212	Mac-A	SETD5.AS1
214	1.25021e-198	-0.921689	0.008	0.543	4.09294e-194	Mac-A	ANKLE2
222	2.41526e-194	-0.923128	0.03	0.592	7.90708e-190	Mac-A	DUSP5
111	9.44449e-243	-0.925629	0.055	0.748	3.09194e-238	Mac-A	PPP1R10
377	2.81472e-92	-0.926148	0.013	0.31	9.21482e-88	Mac-A	PTX3
228	9.44936e-192	-0.92724	0.014	0.545	3.09353e-187	Mac-A	RBBP8
204	5.93486e-203	-0.92934	0.046	0.648	1.94295e-198	Mac-A	SESTD1
286	7.01761e-171	-0.929891	0.059	0.605	2.29742e-166	Mac-A	LILRA5
181	2.37803e-211	-0.931707	0.018	0.594	7.78519e-207	Mac-A	MCTP1
156	1.63045e-220	-0.932207	0.018	0.612	5.33776e-216	Mac-A	LPXN
100	9.41631e-250	-0.934126	0.021	0.677	3.08271e-245	Mac-A	PSEN1
127	2.89009e-236	-0.934717	0.031	0.677	9.46159e-232	Mac-A	SLC7A5
314	2.93743e-160	-0.939233	0.008	0.463	9.61657e-156	Mac-A	ICAM4
93	6.43304e-252	-0.939622	0.019	0.674	2.10605e-247	Mac-A	SMG1
304	2.36568e-164	-0.942632	0.059	0.594	7.74477e-160	Mac-A	VEGFA
65	1.40116e-269	-0.943758	0.072	0.838	4.58712e-265	Mac-A	FAM133B
201	9.80463e-204	-0.946806	0.009	0.558	3.20984e-199	Mac-A	ZBTB43
157	6.06413e-220	-0.948609	0.084	0.767	1.98528e-215	Mac-A	FAM107B
94	8.01701e-252	-0.949592	0.083	0.828	2.62461e-247	Mac-A	TANK
288	9.08924e-171	-0.95105	0.011	0.493	2.97563e-166	Mac-A	KMO
119	2.5029e-240	-0.951325	0.03	0.685	8.194e-236	Mac-A	LSP1
132	4.57335e-234	-0.952976	0.032	0.677	1.49722e-229	Mac-A	LPCAT1
73	9.90077e-262	-0.953053	0.056	0.783	3.24132e-257	Mac-A	GLS
70	3.40273e-265	-0.954998	0.035	0.742	1.11399e-260	Mac-A	CYTH1
380	5.76075e-89	-0.956185	0.01	0.293	1.88596e-84	Mac-A	S100A12
162	1.37438e-218	-0.957462	0.092	0.78	4.49943e-214	Mac-A	MXD1
89	1.06851e-254	-0.958863	0.051	0.761	3.4981e-250	Mac-A	CHD1
209	1.64245e-201	-0.959676	0.031	0.606	5.37705e-197	Mac-A	MAP4K4
113	4.79938e-242	-0.965227	0.021	0.662	1.57122e-237	Mac-A	MAPK6
356	6.70067e-134	-0.966749	0.02	0.433	2.19366e-129	Mac-A	DNAAF1
185	1.34714e-208	-0.967494	0.025	0.607	4.41027e-204	Mac-A	EMR2
130	4.40131e-235	-0.969666	0.084	0.796	1.4409e-230	Mac-A	MYADM
88	2.23069e-255	-0.970412	0.033	0.72	7.30284e-251	Mac-A	ARHGEF2
82	2.4641e-258	-0.970938	0.066	0.802	8.06697e-254	Mac-A	KMT2E
144	4.96703e-227	-0.976914	0.03	0.657	1.62611e-222	Mac-A	CD97
56	7.79881e-278	-0.977536	0.076	0.857	2.55317e-273	Mac-A	MAP2K3
125	6.86679e-237	-0.977672	0.073	0.774	2.24805e-232	Mac-A	IFI30
259	6.322e-181	-0.979162	0.242	0.906	2.06969e-176	Mac-A	IL8
163	1.64386e-218	-0.981156	0.015	0.604	5.38168e-214	Mac-A	CSF3R
86	3.44382e-257	-0.982112	0.073	0.816	1.12744e-252	Mac-A	NABP1
109	6.06919e-246	-0.982627	0.116	0.882	1.98693e-241	Mac-A	VMP1
151	2.99551e-223	-0.987972	0.024	0.634	9.80671e-219	Mac-A	SLC43A2
177	1.42386e-212	-0.990445	0.051	0.679	4.66143e-208	Mac-A	OTUD1
250	5.32225e-184	-0.990676	0.11	0.739	1.7424e-179	Mac-A	BASP1
172	9.11606e-215	-0.990958	0.015	0.594	2.98442e-210	Mac-A	B3GNT5
118	1.77248e-240	-0.991565	0.025	0.669	5.80274e-236	Mac-A	SIPA1L1
338	4.70404e-146	-0.993397	0.049	0.528	1.54001e-141	Mac-A	IL1R2
69	9.33155e-266	-1.00131	0.079	0.845	3.05496e-261	Mac-A	BAZ1A
234	6.54374e-191	-1.00291	0.006	0.524	2.14229e-186	Mac-A	CRIP1
141	9.14902e-228	-1.00299	0.015	0.619	2.99521e-223	Mac-A	NBPF10
83	4.86545e-258	-1.00309	0.049	0.764	1.59285e-253	Mac-A	ANKRD12
257	1.50673e-181	-1.00881	0.012	0.519	4.93273e-177	Mac-A	RAPGEF2
358	3.06021e-131	-1.00952	0.001	0.376	1.00185e-126	Mac-A	LILRA3
188	5.01974e-208	-1.01155	0.008	0.563	1.64336e-203	Mac-A	SDC4
120	6.16185e-240	-1.01507	0.097	0.834	2.01727e-235	Mac-A	LIMS1
231	1.35222e-191	-1.01562	0.052	0.636	4.4269e-187	Mac-A	GRASP
91	9.36523e-253	-1.0178	0.018	0.675	3.06599e-248	Mac-A	ERN1
195	4.11723e-206	-1.01853	0.016	0.58	1.3479e-201	Mac-A	REV3L
102	9.47001e-249	-1.02016	0.022	0.676	3.10029e-244	Mac-A	ZC3H12A
315	1.88601e-159	-1.02068	0.011	0.468	6.17443e-155	Mac-A	KCNQ1OT1
183	3.82157e-211	-1.02605	0.08	0.737	1.25111e-206	Mac-A	TNFAIP8
108	4.88932e-246	-1.02879	0.014	0.652	1.60066e-241	Mac-A	TET2
325	9.42313e-154	-1.0309	0.008	0.449	3.08494e-149	Mac-A	PLAC8
137	1.43928e-229	-1.03417	0.032	0.665	4.7119e-225	Mac-A	NRIP1
107	2.04181e-246	-1.03743	0.103	0.859	6.68448e-242	Mac-A	PDE4B
360	6.38071e-129	-1.03818	0.009	0.393	2.08892e-124	Mac-A	TNIP3
60	1.09437e-270	-1.03911	0.075	0.846	3.58275e-266	Mac-A	GBP2
169	4.07474e-216	-1.04193	0.009	0.581	1.33399e-211	Mac-A	RNF19B
76	3.46159e-261	-1.04203	0.046	0.759	1.13326e-256	Mac-A	SLC38A2
74	2.16267e-261	-1.05004	0.113	0.904	7.08013e-257	Mac-A	TNFRSF1B
92	3.36503e-252	-1.05084	0.033	0.714	1.10164e-247	Mac-A	THAP2
72	2.92114e-263	-1.05248	0.029	0.72	9.56324e-259	Mac-A	ADAM17
90	5.74254e-254	-1.054	0.123	0.909	1.87999e-249	Mac-A	PTPRC
199	2.14159e-204	-1.05986	0.034	0.621	7.01115e-200	Mac-A	PHLDA1
345	1.24804e-142	-1.07257	0.007	0.42	4.08583e-138	Mac-A	APOBEC3A
46	3.4737e-288	-1.07635	0.027	0.761	1.13722e-283	Mac-A	MIR22HG
189	8.65037e-208	-1.07732	0.075	0.714	2.83196e-203	Mac-A	RP11.701P16.5
131	8.13976e-235	-1.08144	0.132	0.889	2.6648e-230	Mac-A	NFKBIZ
215	4.35463e-198	-1.08521	0.093	0.729	1.42562e-193	Mac-A	TNF
178	2.6931e-212	-1.08559	0.003	0.558	8.81669e-208	Mac-A	RP6.99M1.2
140	2.08451e-228	-1.08664	0.003	0.589	6.82426e-224	Mac-A	RP11.138A9.2
58	5.33892e-276	-1.09102	0.056	0.809	1.74786e-271	Mac-A	RIPK2
44	2.18345e-290	-1.09154	0.028	0.768	7.14818e-286	Mac-A	CSRNP1
105	8.08989e-248	-1.09553	0.298	0.966	2.64847e-243	Mac-A	PLAUR
30	3.99777e-300	-1.09936	0.027	0.781	1.30879e-295	Mac-A	NFKB2
64	1.32557e-269	-1.10483	0.016	0.698	4.33966e-265	Mac-A	MAFG
87	3.92394e-257	-1.1064	0.018	0.681	1.28462e-252	Mac-A	IL6R
101	4.62993e-249	-1.10874	0.029	0.694	1.51575e-244	Mac-A	SLC25A37
36	1.46929e-296	-1.10936	0.042	0.81	4.81015e-292	Mac-A	JMJD1C
53	8.40134e-280	-1.11026	0.084	0.877	2.75043e-275	Mac-A	NR4A1
52	2.61912e-281	-1.11041	0.07	0.848	8.57446e-277	Mac-A	KYNU
103	1.27362e-248	-1.11293	0.052	0.748	4.16956e-244	Mac-A	LILRB2
67	3.57136e-268	-1.11374	0.04	0.756	1.16919e-263	Mac-A	NUMB
26	8.60786e-305	-1.11497	0.037	0.812	2.81804e-300	Mac-A	C1orf63
59	1.73915e-273	-1.11616	0.067	0.83	5.69362e-269	Mac-A	LCP2
349	2.26935e-138	-1.11682	0.002	0.397	7.4294e-134	Mac-A	FFAR2
171	5.7023e-216	-1.11781	0.025	0.622	1.86682e-211	Mac-A	LDLR
33	4.31947e-297	-1.11892	0.068	0.868	1.41411e-292	Mac-A	PNPLA8
68	3.66534e-266	-1.12125	0.112	0.897	1.19996e-261	Mac-A	WTAP
293	3.14664e-168	-1.12298	0.013	0.494	1.03015e-163	Mac-A	HES4
110	1.84486e-244	-1.12784	0.175	0.94	6.03972e-240	Mac-A	CD55
99	1.25279e-250	-1.12889	0.127	0.892	4.10138e-246	Mac-A	ZEB2
303	1.27465e-164	-1.13292	0.003	0.459	4.17296e-160	Mac-A	LINC00910
80	1.25269e-258	-1.13577	0.014	0.675	4.10107e-254	Mac-A	PHACTR1
48	1.60149e-286	-1.1358	0.039	0.786	5.24295e-282	Mac-A	RASGEF1B
75	3.08995e-261	-1.13698	0.077	0.823	1.01159e-256	Mac-A	SLC2A3
32	3.75749e-297	-1.14182	0.023	0.766	1.23013e-292	Mac-A	PPP1R15B
85	1.8829e-257	-1.14269	0.005	0.65	6.16424e-253	Mac-A	RP11.138A9.1
365	8.47716e-116	-1.14451	0.001	0.338	2.77525e-111	Mac-A	XIST
221	1.06574e-194	-1.15273	0.002	0.52	3.48903e-190	Mac-A	KB.1507C5.4
81	2.25057e-258	-1.16053	0.033	0.722	7.36791e-254	Mac-A	GPCPD1
135	4.16232e-232	-1.16071	0.011	0.618	1.36266e-227	Mac-A	CDC42EP3
383	6.90708e-79	-1.16282	0.005	0.252	2.26124e-74	Mac-A	SERPINB2
121	9.39692e-240	-1.17001	0.013	0.638	3.07636e-235	Mac-A	CFP
154	1.91712e-221	-1.17167	0.022	0.623	6.27625e-217	Mac-A	ABCA1
29	3.47025e-300	-1.1741	0.037	0.801	1.13609e-295	Mac-A	ZNF267
35	9.71292e-297	-1.1824	0.039	0.803	3.17982e-292	Mac-A	BACH1
142	1.10611e-227	-1.18381	0.228	0.897	3.62119e-223	Mac-A	IL1B
6	0	-1.18546	0.039	0.831	0	Mac-A	CHD2
7	0	-1.18815	0.071	0.916	0	Mac-A	CCNL1
78	4.77347e-259	-1.18852	0.014	0.672	1.56274e-254	Mac-A	NFAT5
54	1.15494e-279	-1.18933	0.077	0.854	3.78105e-275	Mac-A	INSIG1
63	7.6274e-270	-1.19536	0.018	0.703	2.49706e-265	Mac-A	MYO1G
28	4.44071e-301	-1.19579	0.046	0.826	1.4538e-296	Mac-A	SPAG9
104	2.19229e-248	-1.19807	0.011	0.648	7.17711e-244	Mac-A	NFKBID
253	2.59384e-183	-1.19871	0.03	0.567	8.49172e-179	Mac-A	IL1A
301	8.06182e-166	-1.20469	0.012	0.485	2.63928e-161	Mac-A	MIR155HG
51	1.10502e-282	-1.20877	0.043	0.787	3.61763e-278	Mac-A	FGR
43	1.95732e-290	-1.20989	0.023	0.754	6.40789e-286	Mac-A	ARL5B
270	2.05564e-176	-1.2121	0.043	0.58	6.72974e-172	Mac-A	IL1RN
106	6.91846e-247	-1.21327	0.007	0.635	2.26497e-242	Mac-A	TRAF1
174	1.68355e-214	-1.22123	0.001	0.556	5.51161e-210	Mac-A	SLC2A6
61	1.53354e-270	-1.22291	0.023	0.718	5.0205e-266	Mac-A	GCH1
34	7.05959e-297	-1.22788	0.042	0.808	2.31117e-292	Mac-A	MAFF
41	4.16569e-292	-1.26563	0.047	0.813	1.36376e-287	Mac-A	STX11
8	0	-1.26629	0.422	0.992	0	Mac-A	MALAT1
27	2.95337e-302	-1.26683	0.044	0.815	9.66875e-298	Mac-A	EHD1
159	1.40648e-219	-1.26778	0.014	0.599	4.60452e-215	Mac-A	CD300E
62	3.17231e-270	-1.26989	0.027	0.727	1.03855e-265	Mac-A	NR4A3
84	9.78839e-258	-1.27076	0.036	0.725	3.20452e-253	Mac-A	ABL2
96	2.87751e-251	-1.28313	0.033	0.702	9.42038e-247	Mac-A	DUSP6
47	6.97735e-287	-1.28472	0.104	0.911	2.28424e-282	Mac-A	TNFAIP3
49	2.72793e-285	-1.28688	0.091	0.885	8.9307e-281	Mac-A	PIM3
9	0	-1.30239	0.032	0.817	0	Mac-A	FLNA
71	1.42552e-263	-1.31511	0.029	0.717	4.66687e-259	Mac-A	TREM1
39	8.89016e-296	-1.31903	0.009	0.727	2.91046e-291	Mac-A	ITGAX
10	0	-1.32118	0.029	0.823	0	Mac-A	ATP13A3
336	2.06744e-147	-1.3306	0.073	0.56	6.7684e-143	Mac-A	CCL20
11	0	-1.3309	0.063	0.931	0	Mac-A	WSB1
12	0	-1.33291	0.029	0.807	0	Mac-A	FNIP2
40	2.32791e-294	-1.33687	0.036	0.794	7.62112e-290	Mac-A	CD48
13	0	-1.36677	0.033	0.854	0	Mac-A	PLK3
14	0	-1.36795	0.09	0.935	0	Mac-A	TNFAIP2
77	3.78894e-260	-1.37616	0.002	0.643	1.24042e-255	Mac-A	LUCAT1
112	3.54029e-242	-1.3908	0.019	0.654	1.15902e-237	Mac-A	PTGS2
226	5.16694e-192	-1.40443	0.022	0.563	1.69155e-187	Mac-A	C15orf48
15	0	-1.40458	0.073	0.902	0	Mac-A	SERPINB9
45	6.9119e-290	-1.41358	0.037	0.777	2.26282e-285	Mac-A	GK
16	0	-1.42417	0.066	0.918	0	Mac-A	NFKB1
37	1.50394e-296	-1.42487	0.008	0.723	4.9236e-292	Mac-A	MIR29A
17	0	-1.43355	0.071	0.897	0	Mac-A	ICAM1
18	0	-1.4373	0.096	0.95	0	Mac-A	REL
19	0	-1.442	0.057	0.878	0	Mac-A	ATP2B1
139	8.03975e-229	-1.45379	0.011	0.61	2.63205e-224	Mac-A	OLR1
31	1.45997e-297	-1.45411	0.111	0.913	4.77966e-293	Mac-A	BCL2A1
38	3.809e-296	-1.48195	0.024	0.763	1.24699e-291	Mac-A	BIRC3
20	0	-1.54456	0.069	0.942	0	Mac-A	CFLAR
122	9.56426e-238	-1.5495	0.021	0.649	3.13115e-233	Mac-A	CD52
249	1.73595e-184	-1.5667	0.017	0.53	5.68315e-180	Mac-A	TNFAIP6
123	1.50172e-237	-1.56863	0.009	0.619	4.91632e-233	Mac-A	AQP9
21	0	-1.57336	0.027	0.829	0	Mac-A	CCRL2
22	0	-1.58022	0.015	0.814	0	Mac-A	LINC00936
205	1.04503e-202	-1.5993	0.006	0.546	3.42124e-198	Mac-A	FCN1
23	0	-1.63088	0.035	0.847	0	Mac-A	NLRP3
97	4.65816e-251	-1.69368	0.013	0.653	1.52499e-246	Mac-A	VCAN
24	0	-1.76161	0.032	0.934	0	Mac-A	KDM6B
66	1.78286e-268	-1.78477	0.042	0.742	5.83673e-264	Mac-A	G0S2
55	1.21067e-278	-1.88325	0.022	0.718	3.96349e-274	Mac-A	EREG
25	0	-1.943	0.09	0.978	0	Mac-A	NEAT1

## Sheet: Mac-B
	p_val	avg_logFC	pct.1	pct.2	p_val_adj	cluster	gene
514	1.0209e-100	1.89047	0.932	0.096	3.34223e-96	Mac-B	SPARCL1
521	2.19624e-90	1.86021	0.881	0.096	7.19005e-86	Mac-B	VWF
542	1.73972e-74	1.62383	0.881	0.118	5.69549e-70	Mac-B	TIMP3
450	2.76147e-172	1.61321	0.847	0.035	9.04051e-168	Mac-B	PRSS23
556	3.01769e-64	1.58616	0.898	0.151	9.87931e-60	Mac-B	EPAS1
431	1.07106e-214	1.56415	0.831	0.023	3.50644e-210	Mac-B	RAMP3
435	4.17641e-204	1.56027	0.644	0.012	1.36727e-199	Mac-B	MMRN1
468	2.21609e-144	1.53351	0.78	0.037	7.25505e-140	Mac-B	ITM2A
429	1.28779e-218	1.51474	0.864	0.026	4.21595e-214	Mac-B	SYNE2
421	2.74729e-248	1.51012	0.712	0.011	8.99407e-244	Mac-B	PTPRB
508	5.7415e-104	1.46058	0.678	0.041	1.87965e-99	Mac-B	CLDN5
442	4.82552e-179	1.42194	0.678	0.018	1.57978e-174	Mac-B	SLCO2A1
557	4.57661e-64	1.40271	0.746	0.094	1.49829e-59	Mac-B	FLT1
565	4.29968e-58	1.40143	0.729	0.096	1.40763e-53	Mac-B	TM4SF1
519	5.36676e-91	1.39702	0.576	0.033	1.75697e-86	Mac-B	CP
572	1.16917e-53	1.38145	0.847	0.152	3.82764e-49	Mac-B	TGM2
434	1.20527e-205	1.37964	0.746	0.019	3.94583e-201	Mac-B	CLEC14A
452	3.27714e-171	1.36798	0.678	0.02	1.07287e-166	Mac-B	LIFR
425	7.97932e-231	1.3676	0.746	0.015	2.61227e-226	Mac-B	ELTD1
438	1.15787e-192	1.36119	0.712	0.018	3.79063e-188	Mac-B	HSPG2
550	2.08817e-70	1.35403	0.644	0.057	6.83625e-66	Mac-B	C10orf10
470	1.14635e-142	1.35329	0.678	0.027	3.75291e-138	Mac-B	APOLD1
570	1.53621e-54	1.34657	0.949	0.172	5.02923e-50	Mac-B	IGFBP4
448	5.41756e-174	1.3448	0.661	0.018	1.7736e-169	Mac-B	SIX3
437	5.27237e-196	1.34084	0.695	0.017	1.72607e-191	Mac-B	WWTR1
539	1.60835e-76	1.32284	0.763	0.081	5.26541e-72	Mac-B	SPTBN1
588	3.84248e-43	1.32249	0.932	0.267	1.25795e-38	Mac-B	IL6ST
419	3.86386e-259	1.31806	0.712	0.01	1.26495e-254	Mac-B	PTPRG
512	1.43564e-101	1.31199	0.814	0.063	4.70001e-97	Mac-B	SPARC
439	2.96107e-186	1.31074	0.695	0.018	9.69396e-182	Mac-B	SOX18
502	4.78158e-108	1.29284	0.542	0.023	1.56539e-103	Mac-B	FMO2
537	3.60449e-79	1.28995	0.797	0.08	1.18004e-74	Mac-B	IFI27
606	1.38539e-32	1.28974	0.831	0.23	4.53548e-28	Mac-B	CLU
536	2.68639e-79	1.28368	0.763	0.077	8.79469e-75	Mac-B	BMPR2
511	5.50257e-103	1.28299	0.61	0.032	1.80143e-98	Mac-B	C8orf4
422	3.4377e-247	1.27895	0.712	0.011	1.12544e-242	Mac-B	GPR116
417	3.70294e-278	1.26951	0.746	0.01	1.21227e-273	Mac-B	MMRN2
478	1.57349e-128	1.26519	0.576	0.02	5.15128e-124	Mac-B	S1PR1
433	6.21438e-210	1.25056	0.729	0.016	2.03446e-205	Mac-B	NFIB
523	1.00941e-89	1.24412	0.78	0.068	3.30461e-85	Mac-B	PDLIM1
460	5.55868e-155	1.22947	0.661	0.021	1.8198e-150	Mac-B	PODXL
447	2.40078e-176	1.22389	0.695	0.02	7.85966e-172	Mac-B	JAM2
546	1.6107e-72	1.21518	0.61	0.05	5.2731e-68	Mac-B	CRIM1
418	1.40183e-270	1.20416	0.627	0.005	4.5893e-266	Mac-B	DOCK9
533	1.01993e-82	1.19727	0.712	0.059	3.33906e-78	Mac-B	SDPR
441	2.27761e-181	1.19248	0.61	0.013	7.45645e-177	Mac-B	TGFBR3
420	1.80107e-249	1.1856	0.729	0.011	5.89635e-245	Mac-B	ESAM
526	1.61719e-88	1.18166	0.593	0.037	5.29437e-84	Mac-B	CFH
575	1.22994e-52	1.18137	0.424	0.032	4.02657e-48	Mac-B	STC1
507	2.79874e-104	1.18087	0.695	0.044	9.16251e-100	Mac-B	MPZL2
529	1.52437e-86	1.17428	0.661	0.049	4.99049e-82	Mac-B	ACVRL1
516	3.13617e-97	1.17257	0.763	0.058	1.02672e-92	Mac-B	NPDC1
455	6.68411e-164	1.16889	0.678	0.021	2.18824e-159	Mac-B	LIMCH1
573	2.1384e-53	1.1681	0.441	0.034	7.00069e-49	Mac-B	DARC
482	9.89937e-127	1.16304	0.644	0.027	3.24086e-122	Mac-B	PTRF
463	4.37323e-153	1.15865	0.712	0.026	1.43171e-148	Mac-B	CRIP2
566	6.03474e-58	1.15622	0.678	0.081	1.97565e-53	Mac-B	LRRC32
603	4.11598e-34	1.15348	0.915	0.292	1.34749e-29	Mac-B	ENG
504	5.08609e-107	1.14967	0.627	0.033	1.66508e-102	Mac-B	CNN3
554	2.15267e-66	1.14889	0.644	0.061	7.0474e-62	Mac-B	HYAL2
545	4.8555e-73	1.14865	0.678	0.063	1.58959e-68	Mac-B	SLC9A3R2
605	8.04082e-34	1.1463	0.627	0.115	2.6324e-29	Mac-B	PTGDS
560	7.73434e-61	1.13949	0.864	0.133	2.53207e-56	Mac-B	PIK3C2A
506	2.21815e-105	1.1264	0.576	0.027	7.26179e-101	Mac-B	MKL2
475	2.08724e-133	1.12393	0.661	0.027	6.83321e-129	Mac-B	ITGA6
456	1.00953e-161	1.11392	0.559	0.013	3.30501e-157	Mac-B	MCF2L
583	7.04187e-48	1.11335	0.831	0.155	2.30537e-43	Mac-B	KLF9
607	2.73803e-32	1.11324	0.881	0.267	8.96377e-28	Mac-B	TCF4
465	1.00927e-149	1.11171	0.559	0.014	3.30414e-145	Mac-B	RBMS3
611	3.61012e-31	1.11102	0.661	0.146	1.18188e-26	Mac-B	INSR
464	6.07424e-152	1.10335	0.661	0.022	1.98858e-147	Mac-B	ARHGAP29
598	7.32572e-36	1.10298	0.729	0.157	2.39829e-31	Mac-B	DST
472	7.69389e-138	1.10024	0.593	0.019	2.51883e-133	Mac-B	EMCN
436	2.65431e-198	1.08842	0.61	0.011	8.68968e-194	Mac-B	TJP1
449	9.60349e-174	1.07737	0.729	0.023	3.14399e-169	Mac-B	CYYR1
428	3.33057e-222	1.07297	0.559	0.006	1.09036e-217	Mac-B	KDR
454	2.93251e-166	1.06719	0.475	0.007	9.60046e-162	Mac-B	GALNT15
458	1.01467e-156	1.05422	0.593	0.016	3.32184e-152	Mac-B	BCAM
453	2.40333e-170	1.04854	0.576	0.012	7.86804e-166	Mac-B	LDB2
599	9.18261e-36	1.04498	0.356	0.034	3.0062e-31	Mac-B	IGFBP3
562	2.74471e-59	1.04118	0.322	0.015	8.98564e-55	Mac-B	CYP26B1
568	1.37785e-56	1.03433	0.593	0.061	4.51079e-52	Mac-B	FLNB
555	5.09293e-65	1.03367	0.627	0.058	1.66732e-60	Mac-B	ADIRF
490	1.45714e-119	1.03307	0.492	0.015	4.77038e-115	Mac-B	NR2F2
491	6.73699e-119	1.02334	0.475	0.014	2.20556e-114	Mac-B	GJA1
484	2.04137e-126	1.02324	0.525	0.016	6.68304e-122	Mac-B	SRPX
594	9.01707e-39	1.02316	0.695	0.13	2.95201e-34	Mac-B	TNFSF10
471	4.19506e-139	1.02273	0.559	0.016	1.37338e-134	Mac-B	PLSCR4
498	3.54488e-109	1.02214	0.542	0.022	1.16052e-104	Mac-B	PKP4
461	2.01314e-154	1.0181	0.525	0.011	6.5906e-150	Mac-B	ABCB1
517	1.61565e-94	1.01434	0.576	0.031	5.28931e-90	Mac-B	FOXC1
528	1.28147e-86	1.00633	0.492	0.024	4.19528e-82	Mac-B	CAV1
543	3.90294e-74	0.996786	0.458	0.025	1.27774e-69	Mac-B	PLVAP
451	2.06853e-171	0.991568	0.492	0.007	6.77195e-167	Mac-B	PCDH17
430	1.03549e-214	0.988312	0.576	0.007	3.39e-210	Mac-B	ALPL
477	1.13925e-129	0.983046	0.508	0.014	3.72967e-125	Mac-B	SELP
483	1.16626e-126	0.980823	0.475	0.012	3.81812e-122	Mac-B	PPFIBP1
630	8.65364e-24	0.980606	0.729	0.233	2.83303e-19	Mac-B	X7SK.2
541	1.84665e-75	0.979182	0.627	0.05	6.04558e-71	Mac-B	MLLT4
440	2.28314e-184	0.974438	0.525	0.008	7.47453e-180	Mac-B	NCKAP1
534	8.82846e-81	0.972307	0.559	0.036	2.89026e-76	Mac-B	PIK3R3
443	4.35863e-178	0.97082	0.492	0.007	1.42693e-173	Mac-B	PALMD
476	8.9865e-132	0.970076	0.458	0.01	2.942e-127	Mac-B	PREX2
615	2.79911e-30	0.967029	0.576	0.109	9.16374e-26	Mac-B	ID1
609	2.31889e-31	0.957695	0.678	0.145	7.59157e-27	Mac-B	ZBTB38
424	2.04911e-241	0.956586	0.576	0.005	6.70838e-237	Mac-B	CDH5
593	1.12823e-39	0.949912	0.695	0.123	3.69359e-35	Mac-B	NCOA7
552	8.71799e-70	0.948364	0.61	0.05	2.85409e-65	Mac-B	AKAP12
567	2.85675e-57	0.945449	0.525	0.047	9.35244e-53	Mac-B	CALCRL
563	4.88522e-59	0.945319	0.61	0.063	1.59932e-54	Mac-B	SMAD7
604	5.32437e-34	0.937754	0.508	0.075	1.74309e-29	Mac-B	ACKR3
618	1.21308e-29	0.937515	0.746	0.191	3.97139e-25	Mac-B	NKTR
602	1.93029e-34	0.93638	0.729	0.165	6.3194e-30	Mac-B	NEDD9
628	1.19347e-24	0.933139	0.78	0.254	3.90719e-20	Mac-B	UTRN
584	1.09693e-46	0.932374	0.373	0.027	3.59114e-42	Mac-B	SPRY1
487	1.0954e-120	0.930931	0.576	0.022	3.58613e-116	Mac-B	TINAGL1
535	4.42012e-80	0.930384	0.542	0.033	1.44706e-75	Mac-B	ZEB1
595	1.46405e-38	0.930022	0.678	0.114	4.793e-34	Mac-B	EMP2
549	1.06561e-70	0.920946	0.508	0.034	3.48858e-66	Mac-B	PPAP2A
621	3.12335e-27	0.919378	0.898	0.314	1.02252e-22	Mac-B	APP
591	1.31919e-41	0.916578	0.39	0.035	4.31878e-37	Mac-B	GPR126
580	4.29165e-50	0.914342	0.576	0.065	1.405e-45	Mac-B	GNG11
639	6.87001e-21	0.914327	0.797	0.307	2.2491e-16	Mac-B	IGFBP7
613	1.79123e-30	0.909929	0.831	0.195	5.86414e-26	Mac-B	EGFL7
648	8.6059e-18	0.900165	0.458	0.112	2.8174e-13	Mac-B	TFPI
423	3.14036e-245	0.896332	0.542	0.004	1.02809e-240	Mac-B	RUNX1T1
494	5.1708e-115	0.894854	0.525	0.019	1.69282e-110	Mac-B	TENC1
540	8.72841e-76	0.893599	0.542	0.035	2.85751e-71	Mac-B	LEPR
625	1.55277e-25	0.893044	0.627	0.149	5.08344e-21	Mac-B	SPEN
635	1.50273e-21	0.889701	0.695	0.215	4.91965e-17	Mac-B	TSC22D1
629	3.69731e-24	0.875847	0.814	0.271	1.21043e-19	Mac-B	TGFBR2
467	9.42439e-145	0.873685	0.458	0.009	3.08536e-140	Mac-B	CD34
513	2.5615e-101	0.872876	0.407	0.012	8.38585e-97	Mac-B	COL8A1
485	6.53955e-126	0.871683	0.475	0.012	2.14092e-121	Mac-B	ECSCR
578	4.31326e-52	0.87146	0.525	0.052	1.41207e-47	Mac-B	HEG1
538	1.86625e-78	0.868911	0.508	0.03	6.10973e-74	Mac-B	PLAT
564	7.11044e-59	0.865334	0.305	0.013	2.32781e-54	Mac-B	VCAM1
612	6.086e-31	0.863653	0.322	0.033	1.99243e-26	Mac-B	EFEMP1
462	1.35447e-153	0.85968	0.593	0.016	4.43427e-149	Mac-B	COL18A1
503	6.84396e-108	0.858477	0.305	0.004	2.24057e-103	Mac-B	PKHD1L1
577	4.17931e-52	0.852562	0.339	0.02	1.36822e-47	Mac-B	DNASE1L3
587	9.57308e-44	0.84986	0.39	0.033	3.13403e-39	Mac-B	SLC2A1
432	9.3474e-214	0.844481	0.559	0.007	3.06015e-209	Mac-B	ERG
634	1.48815e-21	0.844124	0.407	0.074	4.87191e-17	Mac-B	IFITM1
596	9.10303e-38	0.842335	0.508	0.068	2.98015e-33	Mac-B	SYNE1
486	1.78798e-122	0.84202	0.441	0.01	5.85349e-118	Mac-B	SH3BGRL2
488	3.41473e-120	0.841562	0.424	0.01	1.11792e-115	Mac-B	AC011526.1
530	1.78218e-86	0.839122	0.475	0.022	5.83449e-82	Mac-B	LHFP
586	6.21055e-44	0.834095	0.407	0.035	2.03321e-39	Mac-B	WDR60
645	1.71184e-19	0.833739	0.695	0.223	5.60421e-15	Mac-B	HES1
553	9.79698e-69	0.832605	0.441	0.025	3.20733e-64	Mac-B	MAST4
592	5.16582e-41	0.829753	0.39	0.035	1.69119e-36	Mac-B	ADAMTS1
561	1.02536e-60	0.824705	0.39	0.022	3.35682e-56	Mac-B	EFNA1
547	5.31509e-72	0.822026	0.525	0.035	1.74005e-67	Mac-B	CALD1
495	4.39288e-114	0.815552	0.593	0.025	1.43814e-109	Mac-B	FERMT2
581	5.93319e-50	0.811799	0.475	0.043	1.94241e-45	Mac-B	EFNB2
499	4.62039e-109	0.811526	0.424	0.011	1.51262e-104	Mac-B	NES
610	2.89565e-31	0.81123	0.356	0.039	9.47976e-27	Mac-B	ZNF37A
614	2.65821e-30	0.80954	0.644	0.136	8.70244e-26	Mac-B	FRYL
497	5.73287e-111	0.808759	0.407	0.01	1.87683e-106	Mac-B	ABCG2
644	1.07595e-19	0.805754	0.542	0.147	3.52246e-15	Mac-B	STARD8
640	7.44231e-21	0.804158	0.627	0.169	2.43646e-16	Mac-B	KIAA1109
457	3.38018e-161	0.804027	0.458	0.007	1.1066e-156	Mac-B	OSMR
608	2.2837e-31	0.803989	0.661	0.131	7.47639e-27	Mac-B	LUZP1
636	2.02295e-21	0.798956	0.458	0.095	6.62273e-17	Mac-B	TNFRSF10D
444	4.7343e-178	0.797741	0.441	0.004	1.54991e-173	Mac-B	HIF3A
518	1.57125e-92	0.794887	0.424	0.015	5.14395e-88	Mac-B	ITGA1
641	3.10953e-20	0.788736	0.831	0.29	1.018e-15	Mac-B	CD59
426	6.55259e-228	0.785794	0.492	0.003	2.14519e-223	Mac-B	CXorf36
522	5.0497e-90	0.78298	0.254	0.004	1.65317e-85	Mac-B	THSD7A
597	5.10726e-37	0.78174	0.61	0.096	1.67201e-32	Mac-B	ZBTB16
647	2.69478e-18	0.780599	0.746	0.303	8.82216e-14	Mac-B	MACF1
525	5.31965e-89	0.780269	0.39	0.013	1.74155e-84	Mac-B	MYO10
459	4.97544e-156	0.776152	0.492	0.009	1.62886e-151	Mac-B	SHANK3
520	7.71896e-91	0.775237	0.373	0.011	2.52703e-86	Mac-B	CPLX1
574	1.21504e-52	0.772762	0.593	0.062	3.97781e-48	Mac-B	GPR56
473	6.32859e-135	0.771918	0.424	0.008	2.07185e-130	Mac-B	EPB41L4A
427	1.5836e-227	0.769913	0.492	0.003	5.18439e-223	Mac-B	MYCT1
501	1.71503e-108	0.769596	0.39	0.009	5.61468e-104	Mac-B	MECOM
481	8.27689e-128	0.767936	0.39	0.007	2.70969e-123	Mac-B	ITIH5
582	1.86964e-48	0.767049	0.492	0.047	6.12081e-44	Mac-B	CTNNAL1
626	7.39012e-25	0.766796	0.695	0.184	2.41938e-20	Mac-B	PCMTD1
527	6.44343e-88	0.765682	0.373	0.012	2.10945e-83	Mac-B	SMAD6
616	4.5206e-30	0.765463	0.322	0.033	1.47995e-25	Mac-B	CYR61
576	3.9066e-52	0.764899	0.508	0.046	1.27894e-47	Mac-B	LAMB2
571	8.49868e-54	0.764515	0.492	0.042	2.7823e-49	Mac-B	AKT3
480	7.24649e-128	0.763792	0.39	0.007	2.37235e-123	Mac-B	SOX7
646	8.00435e-19	0.756471	0.847	0.35	2.62046e-14	Mac-B	RRBP1
627	1.07155e-24	0.755847	0.78	0.213	3.50803e-20	Mac-B	A2M
649	1.22711e-16	0.755794	0.627	0.204	4.01732e-12	Mac-B	ZNF638
631	3.80689e-23	0.752357	0.78	0.241	1.2463e-18	Mac-B	HIPK3
505	7.61176e-107	0.749934	0.356	0.007	2.49194e-102	Mac-B	FBLN2
492	4.95713e-118	0.746364	0.356	0.006	1.62287e-113	Mac-B	BTNL9
446	3.22425e-177	0.745426	0.458	0.005	1.05555e-172	Mac-B	COL4A1
509	1.73581e-103	0.745426	0.373	0.009	5.68269e-99	Mac-B	VWA1
489	4.23351e-120	0.745238	0.424	0.01	1.38597e-115	Mac-B	TEK
544	9.06408e-74	0.744932	0.542	0.036	2.9674e-69	Mac-B	PTPRM
496	5.33939e-111	0.742689	0.458	0.014	1.74801e-106	Mac-B	MSRB3
579	6.1501e-51	0.742593	0.525	0.051	2.01342e-46	Mac-B	ARHGEF12
622	4.40447e-26	0.74092	0.356	0.047	1.44194e-21	Mac-B	EFNB1
600	3.34359e-35	0.734431	0.678	0.124	1.09462e-30	Mac-B	KMT2A
469	3.65338e-143	0.733517	0.339	0.003	1.19604e-138	Mac-B	DLL4
474	1.56419e-133	0.732256	0.441	0.009	5.12083e-129	Mac-B	ITGA10
558	1.42822e-62	0.730547	0.305	0.012	4.67571e-58	Mac-B	MYLK
590	4.13006e-42	0.728416	0.492	0.054	1.3521e-37	Mac-B	ODF2L
633	1.36625e-21	0.728167	0.678	0.198	4.47282e-17	Mac-B	PHACTR2
479	4.7918e-128	0.728135	0.492	0.013	1.56874e-123	Mac-B	RASIP1
510	2.55566e-103	0.727553	0.373	0.009	8.36672e-99	Mac-B	NXN
532	5.57699e-83	0.725485	0.492	0.025	1.82579e-78	Mac-B	GRB10
500	8.83232e-109	0.725127	0.39	0.009	2.89152e-104	Mac-B	CAV2
643	5.8778e-20	0.724531	0.729	0.252	1.92427e-15	Mac-B	RDX
493	7.41591e-118	0.72419	0.356	0.006	2.42782e-113	Mac-B	RP11.89K21.1
617	1.13347e-29	0.722792	0.627	0.117	3.71075e-25	Mac-B	NRP1
551	3.84652e-70	0.721819	0.373	0.016	1.25927e-65	Mac-B	FAM107A
619	1.97011e-28	0.72038	0.627	0.132	6.44976e-24	Mac-B	GBP4
637	2.08986e-21	0.719216	0.542	0.123	6.8418e-17	Mac-B	GIMAP5
632	6.96247e-22	0.717355	0.356	0.053	2.27938e-17	Mac-B	NNMT
559	4.55075e-61	0.717149	0.39	0.022	1.48983e-56	Mac-B	CD320
445	7.50695e-178	0.716546	0.458	0.005	2.45762e-173	Mac-B	RAPGEF5
620	8.70047e-28	0.715442	0.254	0.022	2.84836e-23	Mac-B	EDN1
650	1.75469e-15	0.714806	0.746	0.314	5.74452e-11	Mac-B	NDRG1
624	4.9668e-26	0.714071	0.508	0.092	1.62603e-21	Mac-B	ZNF503
548	9.87151e-72	0.709071	0.373	0.016	3.23174e-67	Mac-B	ROBO4
601	1.74608e-34	0.703732	0.475	0.062	5.71632e-30	Mac-B	NFIA
585	1.14206e-44	0.701987	0.712	0.102	3.73887e-40	Mac-B	GIMAP7
623	4.48243e-26	0.700974	0.627	0.144	1.46746e-21	Mac-B	PSIP1
515	5.16996e-100	0.700622	0.525	0.023	1.69254e-95	Mac-B	CFI
531	1.65045e-85	0.70053	0.475	0.022	5.40326e-81	Mac-B	LIMS2
524	2.20118e-89	0.696311	0.373	0.011	7.20623e-85	Mac-B	PROCR
642	3.59753e-20	0.69595	0.576	0.141	1.17776e-15	Mac-B	ZNF292
569	2.92823e-55	0.695865	0.492	0.04	9.58643e-51	Mac-B	MTUS1
638	6.77011e-21	0.695769	0.441	0.088	2.2164e-16	Mac-B	SOS1
589	2.23783e-42	0.69575	0.475	0.05	7.32622e-38	Mac-B	CAMSAP2
466	2.71445e-148	0.695493	0.424	0.006	8.88657e-144	Mac-B	SHROOM4

## Sheet: Mac-C
	p_val	avg_logFC	pct.1	pct.2	p_val_adj	cluster	gene
663	0	1.97387	0.961	0.048	0	Mac-C	FCN1
664	0	1.76224	0.959	0.133	0	Mac-C	CD52
665	0	1.72913	0.819	0.095	0	Mac-C	TNFAIP6
709	4.22816e-211	1.629	0.47	0.013	1.38421e-206	Mac-C	SERPINB2
666	0	1.62459	0.962	0.102	0	Mac-C	AQP9
667	0	1.54855	0.931	0.141	0	Mac-C	VCAN
713	6.11036e-209	1.4365	0.513	0.031	2.00041e-204	Mac-C	S100A12
668	0	1.41848	0.743	0.037	0	Mac-C	APOBEC3A
669	0	1.36569	0.671	0.027	0	Mac-C	LILRA3
680	3.12783e-275	1.36305	0.663	0.047	1.02399e-270	Mac-C	FFAR2
674	1.04917e-305	1.29464	0.888	0.126	3.43477e-301	Mac-C	RP11.290F20.3
672	4.05473e-307	1.28464	0.863	0.127	1.32744e-302	Mac-C	CD300E
670	0	1.27199	0.909	0.138	0	Mac-C	CFP
753	5.64562e-177	1.24159	0.754	0.177	1.84826e-172	Mac-C	CCL20
676	9.96382e-284	1.23198	0.922	0.201	3.26196e-279	Mac-C	TREM1
698	3.28643e-224	1.23195	0.916	0.229	1.07591e-219	Mac-C	G0S2
675	9.93094e-300	1.22487	0.894	0.149	3.25119e-295	Mac-C	LILRA5
704	8.10249e-218	1.20589	0.88	0.212	2.65259e-213	Mac-C	EREG
770	2.08728e-158	1.18484	0.486	0.055	6.83333e-154	Mac-C	PTX3
673	9.3154e-306	1.15238	0.969	0.244	3.04967e-301	Mac-C	FGR
671	0	1.15021	0.838	0.097	0	Mac-C	SLC2A6
712	1.95458e-209	1.14289	0.651	0.093	6.39891e-205	Mac-C	PLAC8
710	1.15178e-209	1.1365	0.658	0.086	3.77071e-205	Mac-C	DNAAF1
678	5.90762e-279	1.12519	0.969	0.244	1.93404e-274	Mac-C	CD48
683	3.84014e-258	1.11751	0.678	0.068	1.25718e-253	Mac-C	PTGER2
682	4.08248e-265	1.11123	0.886	0.21	1.33652e-260	Mac-C	GCH1
758	5.52584e-173	1.10968	0.739	0.177	1.80905e-168	Mac-C	IL1RN
681	2.29116e-272	1.09613	0.654	0.046	7.5008e-268	Mac-C	FAM65B
688	9.40417e-241	1.09535	0.589	0.04	3.07874e-236	Mac-C	C19orf59
677	1.13334e-279	1.09373	0.858	0.155	3.71034e-275	Mac-C	LTA4H
775	8.4781e-156	1.07651	0.622	0.138	2.77556e-151	Mac-C	HES4
686	7.34242e-246	1.07426	0.935	0.257	2.40376e-241	Mac-C	LINC00936
691	6.82484e-237	1.06912	0.951	0.27	2.23432e-232	Mac-C	CCRL2
685	8.96533e-251	1.06556	0.9	0.215	2.93507e-246	Mac-C	GPCPD1
684	6.15326e-253	1.05358	0.922	0.239	2.01446e-248	Mac-C	LILRB2
679	4.25638e-278	1.0322	0.907	0.189	1.39345e-273	Mac-C	MYO1G
714	6.13042e-209	1.02448	0.862	0.214	2.00698e-204	Mac-C	DUSP6
690	4.97928e-238	0.994762	0.777	0.143	1.63012e-233	Mac-C	RNF19B
768	1.46031e-160	0.988673	0.725	0.184	4.78078e-156	Mac-C	OLR1
696	2.21308e-225	0.982713	0.942	0.274	7.24519e-221	Mac-C	STX11
689	2.52202e-240	0.981599	0.847	0.157	8.25659e-236	Mac-C	LDLR
719	1.50003e-203	0.97266	0.897	0.258	4.9108e-199	Mac-C	GK
700	2.13738e-223	0.966335	0.934	0.281	6.99737e-219	Mac-C	STXBP2
744	1.4959e-183	0.963335	0.678	0.135	4.89727e-179	Mac-C	CRIP1
703	9.54034e-219	0.958534	0.855	0.208	3.12332e-214	Mac-C	SLC25A37
697	4.81481e-225	0.957488	0.696	0.095	1.57627e-220	Mac-C	LILRB1
708	9.72224e-213	0.95354	0.828	0.195	3.18287e-208	Mac-C	IGSF6
732	7.04383e-196	0.952612	0.742	0.15	2.30601e-191	Mac-C	CCDC71L
745	5.3618e-183	0.950193	0.823	0.218	1.75535e-178	Mac-C	RP11.1143G9.4
757	3.79755e-175	0.944446	0.528	0.062	1.24324e-170	Mac-C	SELL
716	7.20929e-208	0.941426	0.957	0.322	2.36018e-203	Mac-C	ATP2B1
705	1.02297e-215	0.93978	0.988	0.405	3.34899e-211	Mac-C	SERPINA1
692	2.46693e-232	0.932749	0.931	0.266	8.07624e-228	Mac-C	BACH1
695	9.53544e-226	0.921147	0.61	0.055	3.12171e-221	Mac-C	CTB.61M7.2
746	3.6337e-181	0.91498	0.884	0.242	1.1896e-176	Mac-C	RP11.701P16.5
694	2.92617e-228	0.909694	0.943	0.268	9.57968e-224	Mac-C	FLNA
722	2.01487e-199	0.905295	0.897	0.274	6.59627e-195	Mac-C	UBE2D1
734	6.06184e-195	0.900132	0.793	0.176	1.98452e-190	Mac-C	ABCA1
718	3.60156e-206	0.898265	0.885	0.25	1.17908e-201	Mac-C	NUMB
728	2.01481e-197	0.894298	0.913	0.285	6.59609e-193	Mac-C	EHD1
699	9.11831e-224	0.888063	0.52	0.021	2.98515e-219	Mac-C	CDA
763	1.45645e-167	0.885787	0.993	0.369	4.76814e-163	Mac-C	BCL2A1
731	1.803e-196	0.885364	0.992	0.43	5.90267e-192	Mac-C	CD55
702	7.85619e-222	0.885119	0.981	0.379	2.57196e-217	Mac-C	PTPRC
789	2.98721e-143	0.884321	0.475	0.063	9.77952e-139	Mac-C	NKG7
750	6.56617e-178	0.883115	0.591	0.093	2.14963e-173	Mac-C	SFMBT2
764	1.5421e-165	0.875198	0.915	0.301	5.04853e-161	Mac-C	NLRP3
737	1.645e-191	0.874472	0.777	0.191	5.38542e-187	Mac-C	SLC43A2
733	9.90307e-196	0.870178	0.951	0.318	3.24207e-191	Mac-C	LIMS1
687	4.73337e-242	0.863292	0.622	0.048	1.54961e-237	Mac-C	ECE1
717	8.25851e-207	0.862669	0.827	0.193	2.70367e-202	Mac-C	CD97
723	2.42945e-199	0.862256	0.604	0.075	7.95352e-195	Mac-C	LINC00877
725	2.23657e-198	0.861465	0.783	0.18	7.32209e-194	Mac-C	WARS
729	3.51453e-197	0.859591	0.968	0.374	1.15059e-192	Mac-C	ZEB2
747	1.86874e-179	0.856337	0.759	0.195	6.11788e-175	Mac-C	PLBD1
693	3.16187e-232	0.838151	0.652	0.065	1.03513e-227	Mac-C	FPR2
724	3.16822e-199	0.83641	0.589	0.068	1.03721e-194	Mac-C	CPD
727	1.30429e-197	0.834698	0.759	0.159	4.26999e-193	Mac-C	PAG1
751	1.52673e-177	0.832676	0.639	0.113	4.99821e-173	Mac-C	MLTK
707	1.63508e-213	0.828175	0.848	0.2	5.35292e-209	Mac-C	LPCAT1
749	4.18242e-179	0.825447	0.544	0.066	1.36924e-174	Mac-C	PDE4D
735	2.17663e-194	0.82109	0.656	0.105	7.12584e-190	Mac-C	CLEC12A
720	1.71771e-201	0.820562	0.7	0.115	5.62345e-197	Mac-C	DMXL2
736	4.17554e-193	0.815853	0.824	0.215	1.36699e-188	Mac-C	UBE2J1
738	9.89934e-191	0.809398	0.532	0.049	3.24085e-186	Mac-C	CDC42EP2
760	1.93339e-170	0.806239	0.884	0.286	6.32952e-166	Mac-C	FAM107B
796	7.62187e-129	0.806147	0.411	0.047	2.49525e-124	Mac-C	RETN
786	9.04988e-145	0.806065	0.663	0.173	2.96275e-140	Mac-C	FBP1
711	1.58042e-209	0.803758	0.637	0.084	5.17398e-205	Mac-C	LILRA2
799	2.15015e-127	0.802666	0.394	0.043	7.03917e-123	Mac-C	SLC16A6
782	5.90194e-150	0.799934	0.946	0.353	1.93218e-145	Mac-C	PIM3
792	2.0731e-140	0.799732	0.488	0.073	6.78692e-136	Mac-C	FAM101B
748	1.91874e-179	0.796873	0.382	0.004	6.28157e-175	Mac-C	FOLR3
787	1.73896e-143	0.796176	0.522	0.086	5.69299e-139	Mac-C	ANPEP
740	1.05688e-189	0.79125	0.737	0.156	3.46003e-185	Mac-C	B4GALT5
762	6.41839e-169	0.786838	0.949	0.373	2.10125e-164	Mac-C	EIF1B
777	2.2944e-154	0.78525	0.414	0.03	7.51141e-150	Mac-C	PTGES
701	3.39091e-222	0.783727	0.728	0.12	1.11011e-217	Mac-C	C19orf38
721	3.89504e-200	0.783457	0.997	0.617	1.27516e-195	Mac-C	TIMP1
743	1.9678e-184	0.776032	0.869	0.251	6.44217e-180	Mac-C	MIR22HG
790	4.90797e-142	0.773867	0.843	0.259	1.60677e-137	Mac-C	BIRC3
767	3.39303e-161	0.767299	0.873	0.288	1.11081e-156	Mac-C	IFI30
798	9.98101e-128	0.765137	0.497	0.091	3.26758e-123	Mac-C	LRG1
754	1.39209e-176	0.757536	0.545	0.059	4.55744e-172	Mac-C	CD36
779	7.14558e-154	0.75659	0.961	0.37	2.33932e-149	Mac-C	WTAP
765	2.22096e-165	0.755296	0.656	0.136	7.27099e-161	Mac-C	LFNG
778	4.76488e-154	0.754685	0.683	0.153	1.55993e-149	Mac-C	MARCKSL1
741	4.70626e-187	0.751456	0.896	0.271	1.54074e-182	Mac-C	CSTA
780	9.27607e-154	0.749868	0.751	0.192	3.0368e-149	Mac-C	LUCAT1
793	1.29416e-139	0.749816	0.932	0.354	4.23681e-135	Mac-C	ICAM1
755	3.78712e-176	0.745565	0.778	0.205	1.23983e-171	Mac-C	PHF20L1
791	5.13327e-142	0.742934	0.662	0.168	1.68053e-137	Mac-C	ZBTB43
771	3.50495e-158	0.742333	0.89	0.314	1.14745e-153	Mac-C	PLK3
800	1.67358e-126	0.741027	0.698	0.199	5.47896e-122	Mac-C	CDC42EP3
756	2.86708e-175	0.739701	0.829	0.236	9.38626e-171	Mac-C	ADAM17
781	4.51557e-153	0.730544	0.988	0.404	1.47831e-148	Mac-C	NEAT1
785	8.72893e-147	0.72699	0.716	0.194	2.85768e-142	Mac-C	EMR2
795	2.90677e-136	0.726908	0.505	0.08	9.51618e-132	Mac-C	CHST7
715	4.34797e-208	0.724186	0.671	0.099	1.42344e-203	Mac-C	CPPED1
797	1.90132e-128	0.723752	0.686	0.193	6.22453e-124	Mac-C	GBP1
769	1.21871e-159	0.717662	0.756	0.199	3.98983e-155	Mac-C	SERPINB8
759	8.13127e-173	0.716887	0.943	0.327	2.66201e-168	Mac-C	LYN
788	1.85979e-143	0.714593	0.884	0.299	6.08858e-139	Mac-C	RIPK2
772	4.18519e-158	0.709953	0.819	0.233	1.37015e-153	Mac-C	ITGAX
802	5.53906e-121	0.709722	0.709	0.212	1.81338e-116	Mac-C	PHLDA1
766	1.25724e-161	0.709675	0.698	0.159	4.11595e-157	Mac-C	MX2
801	2.77396e-122	0.705095	0.869	0.328	9.0814e-118	Mac-C	SLC2A3
776	4.68971e-155	0.702013	0.721	0.178	1.53532e-150	Mac-C	NDRG1
804	5.6098e-106	0.698523	0.311	0.027	1.83654e-101	Mac-C	F3
773	5.25396e-158	0.694626	0.555	0.081	1.72004e-153	Mac-C	RP11.295G20.2
849	3.21829e-11	-0.698769	0.198	0.295	1.0536e-06	Mac-C	TCEAL4
840	1.12704e-18	-0.703996	0.528	0.523	3.68972e-14	Mac-C	HLA.DMA
850	1.61169e-08	-0.722769	0.298	0.35	0.000527634	Mac-C	TMEM70
812	3.33138e-70	-0.726187	0.794	0.739	1.09063e-65	Mac-C	HLA.DRB5
833	2.42083e-25	-0.728173	0.48	0.539	7.92533e-21	Mac-C	MSR1
847	8.25999e-13	-0.750225	0.198	0.302	2.70416e-08	Mac-C	PARVB
852	2.15516e-08	-0.755454	0.26	0.317	0.000705558	Mac-C	MAF
851	1.73474e-08	-0.756912	0.183	0.255	0.000567918	Mac-C	SRM
844	4.47729e-15	-0.761556	0.579	0.547	1.46577e-10	Mac-C	RHOB
842	5.27282e-17	-0.767471	0.143	0.272	1.72622e-12	Mac-C	PLAU
837	7.28609e-20	-0.775998	0.517	0.532	2.38532e-15	Mac-C	HMGN1
706	1.64885e-214	-0.790477	0.966	0.931	5.39801e-210	Mac-C	CD74
831	2.53122e-29	-0.799803	0.093	0.279	8.28672e-25	Mac-C	USP53
843	1.91451e-16	-0.821055	0.544	0.53	6.26771e-12	Mac-C	TUBB
848	9.83595e-12	-0.838746	0.551	0.508	3.22009e-07	Mac-C	PDIA4
846	4.58889e-14	-0.852437	0.476	0.492	1.50231e-09	Mac-C	PLD3
836	4.44525e-21	-0.852923	0.158	0.312	1.45529e-16	Mac-C	TSPAN4
829	3.03531e-33	-0.856888	0.549	0.582	9.93698e-29	Mac-C	HLA.DQB1
841	3.30014e-18	-0.864442	0.16	0.295	1.0804e-13	Mac-C	ARL2
817	7.74759e-52	-0.864508	0.666	0.707	2.53641e-47	Mac-C	RGS2
826	3.05503e-34	-0.871325	0.084	0.294	1.00016e-29	Mac-C	MRC1L1
839	1.01943e-18	-0.882883	0.33	0.424	3.3374e-14	Mac-C	PPP1R14B
830	1.12873e-31	-0.895292	0.189	0.389	3.69524e-27	Mac-C	ARL4C
827	1.11089e-33	-0.917687	0.061	0.263	3.63685e-29	Mac-C	STMN1
794	1.37395e-138	-0.918201	0.788	0.844	4.49804e-134	Mac-C	HLA.DPA1
838	4.03639e-19	-0.928352	0.204	0.337	1.32143e-14	Mac-C	CD59
828	2.21499e-33	-0.940644	0.375	0.496	7.25143e-29	Mac-C	GSN
823	1.44406e-37	-0.942744	0.064	0.284	4.72757e-33	Mac-C	A2M
845	9.40658e-15	-0.954489	0.265	0.359	3.07952e-10	Mac-C	MT1X
825	1.02518e-34	-1.00536	0.372	0.522	3.35623e-30	Mac-C	TMEM176B
784	5.21527e-147	-1.00777	0.713	0.837	1.70737e-142	Mac-C	HLA.DPB1
834	9.15249e-25	-1.01011	0.184	0.346	2.99634e-20	Mac-C	LGMN
835	1.17688e-23	-1.02907	0.286	0.415	3.85286e-19	Mac-C	TMEM176A
832	2.68281e-27	-1.03229	0.225	0.39	8.78299e-23	Mac-C	PDK4
819	4.85078e-45	-1.03422	0.429	0.567	1.58805e-40	Mac-C	SAP30
821	8.54094e-42	-1.04436	0.233	0.45	2.79613e-37	Mac-C	ARHGAP18
820	4.31987e-42	-1.04557	0.202	0.431	1.41424e-37	Mac-C	PTMS
818	1.19425e-47	-1.07746	0.07	0.333	3.90974e-43	Mac-C	VEGFB
808	1.20727e-83	-1.08837	0.583	0.701	3.95237e-79	Mac-C	CD81
815	2.50857e-60	-1.12448	0.498	0.649	8.21255e-56	Mac-C	TXNIP
805	1.31976e-103	-1.12554	0.421	0.75	4.32062e-99	Mac-C	VSIG4
783	3.0348e-148	-1.14982	0.72	0.873	9.93531e-144	Mac-C	TUBA1B
824	1.00012e-36	-1.16325	0.108	0.325	3.27418e-32	Mac-C	GPR34
822	1.35458e-39	-1.1954	0.212	0.425	4.43462e-35	Mac-C	DAB2
813	6.20541e-69	-1.23093	0.319	0.581	2.03153e-64	Mac-C	HLA.DQA1
816	3.08147e-57	-1.23335	0.258	0.513	1.00881e-52	Mac-C	PEBP1
814	4.71028e-67	-1.33328	0.031	0.357	1.54205e-62	Mac-C	SLCO2B1
810	1.92438e-73	-1.33728	0.179	0.514	6.30002e-69	Mac-C	AKR1B1
739	2.73428e-190	-1.33995	0.417	0.89	8.95149e-186	Mac-C	C1QA
811	1.54852e-71	-1.45884	0.062	0.406	5.06953e-67	Mac-C	RGS1
730	1.21518e-196	-1.50384	0.325	0.869	3.97824e-192	Mac-C	C1QB
803	9.00081e-114	-1.51412	0.173	0.618	2.94669e-109	Mac-C	ALOX5AP
809	3.01436e-75	-1.52611	0.084	0.44	9.86842e-71	Mac-C	PMP22
807	6.57475e-91	-1.53231	0.162	0.545	2.15244e-86	Mac-C	LYVE1
726	9.56147e-198	-1.58882	0.28	0.842	3.13024e-193	Mac-C	C1QC
806	1.70407e-94	-1.69765	0.176	0.556	5.57877e-90	Mac-C	FOLR2
742	1.6703e-186	-2.02644	0.185	0.763	5.46823e-182	Mac-C	F13A1
761	1.95754e-170	-2.13287	0.248	0.748	6.4086e-166	Mac-C	RNASE1
774	3.13575e-156	-2.26157	0.077	0.647	1.02658e-151	Mac-C	SEPP1
752	2.42e-177	-2.34568	0.114	0.709	7.92259e-173	Mac-C	PLTP

## Sheet: Mac-D
	p_val	avg_logFC	pct.1	pct.2	p_val_adj	cluster	gene
871	6.02988e-100	1.33918	0.594	0.175	1.97406e-95	Mac-D	LINC00910
860	1.7337e-122	1.30254	0.469	0.07	5.67578e-118	Mac-D	TEX14
864	9.68703e-112	1.18041	0.371	0.04	3.17134e-107	Mac-D	44078
857	2.7935e-163	1.17642	0.893	0.303	9.14536e-159	Mac-D	ABL2
874	8.18009e-95	1.0587	0.389	0.061	2.678e-90	Mac-D	MTMR4
883	2.65664e-87	1.00679	0.622	0.208	8.6973e-83	Mac-D	KB.1507C5.4
882	1.50849e-87	1.00328	0.585	0.183	4.93849e-83	Mac-D	ICAM4
878	3.59153e-91	0.977019	0.26	0.019	1.17579e-86	Mac-D	PDE4C
889	2.02296e-81	0.973474	0.585	0.187	6.62276e-77	Mac-D	KCNQ1OT1
859	8.46562e-123	0.952057	0.889	0.38	2.77147e-118	Mac-D	NR4A2
858	1.63957e-130	0.946648	0.559	0.088	5.36763e-126	Mac-D	SLC16A10
863	1.86636e-112	0.894884	0.985	0.476	6.11009e-108	Mac-D	NEAT1
870	1.5696e-100	0.887104	0.408	0.057	5.13854e-96	Mac-D	TCHH
877	3.34207e-91	0.886056	0.692	0.243	1.09413e-86	Mac-D	WDR74
913	1.43763e-53	0.881373	0.598	0.269	4.70651e-49	Mac-D	DNAJA4
861	1.53701e-116	0.845697	0.869	0.334	5.03188e-112	Mac-D	PPP1R10
900	7.53414e-72	0.840741	0.568	0.2	2.46653e-67	Mac-D	CYB5D1
884	4.48863e-86	0.833728	0.321	0.041	1.46949e-81	Mac-D	KBTBD6
862	2.3613e-114	0.832161	0.572	0.113	7.73043e-110	Mac-D	NRP2
896	1.00765e-76	0.830406	0.574	0.19	3.29886e-72	Mac-D	SNORD3B.2
894	8.79707e-79	0.827967	0.646	0.225	2.87998e-74	Mac-D	NXF1
865	2.57795e-104	0.816115	0.845	0.332	8.43968e-100	Mac-D	SGK1
868	1.15992e-101	0.815103	0.539	0.112	3.79733e-97	Mac-D	GEM
866	2.63131e-104	0.805049	0.906	0.425	8.61438e-100	Mac-D	NR4A1
879	8.64393e-91	0.798396	0.926	0.428	2.82985e-86	Mac-D	KDM6B
872	6.11561e-99	0.795745	0.415	0.066	2.00213e-94	Mac-D	SLC25A44
887	2.73952e-82	0.788786	0.579	0.166	8.96864e-78	Mac-D	RP11.386I14.4
911	4.36327e-57	0.785942	0.467	0.157	1.42845e-52	Mac-D	SNORD3D
873	2.56614e-95	0.78041	0.758	0.289	8.40103e-91	Mac-D	SIPA1L1
899	2.4366e-73	0.779585	0.782	0.36	7.97694e-69	Mac-D	TNF
875	7.72698e-93	0.77153	0.889	0.461	2.52966e-88	Mac-D	TNFAIP3
909	1.49147e-62	0.766969	0.579	0.222	4.88278e-58	Mac-D	RAPGEF2
886	7.5011e-83	0.763296	0.426	0.086	2.45571e-78	Mac-D	RNU12
906	4.12662e-67	0.762294	0.321	0.06	1.35097e-62	Mac-D	ICAM5
891	2.36582e-80	0.760344	0.766	0.325	7.74522e-76	Mac-D	NR4A3
912	8.85345e-57	0.755969	0.646	0.281	2.89844e-52	Mac-D	LUCAT1
876	4.14569e-92	0.754933	0.784	0.287	1.35722e-87	Mac-D	STAB1
867	3.60536e-103	0.74395	0.504	0.09	1.18032e-98	Mac-D	PDGFB
880	1.17077e-90	0.735579	0.803	0.332	3.83287e-86	Mac-D	NUFIP2
869	1.5662e-101	0.726677	0.969	0.552	5.12742e-97	Mac-D	FOSB
888	1.12377e-81	0.724737	0.731	0.275	3.67901e-77	Mac-D	HEXIM1
881	7.44854e-89	0.724619	0.417	0.076	2.4385e-84	Mac-D	RNU11
907	7.07003e-67	0.716262	0.703	0.298	2.31459e-62	Mac-D	SESTD1
904	1.62075e-68	0.715866	0.736	0.318	5.306e-64	Mac-D	MIR29A
903	3.37943e-69	0.715628	0.91	0.441	1.10636e-64	Mac-D	CCNL1
890	1.17937e-80	0.71407	0.952	0.456	3.86101e-76	Mac-D	TNFAIP2
893	2.06176e-79	0.713196	0.64	0.215	6.7498e-75	Mac-D	INTS6
905	1.82278e-67	0.702461	0.461	0.129	5.96741e-63	Mac-D	SNORD3A
901	3.71435e-70	0.701489	0.701	0.279	1.216e-65	Mac-D	NFKBID
916	3.01849e-50	0.701428	0.535	0.209	9.88192e-46	Mac-D	MIR155HG
897	1.92648e-76	0.701264	0.902	0.441	6.30691e-72	Mac-D	NFKB1
908	6.43577e-65	0.701173	0.773	0.365	2.10694e-60	Mac-D	EIF4E
902	4.20058e-70	0.700572	0.873	0.466	1.37519e-65	Mac-D	NFKBIZ
910	6.23619e-61	0.700329	0.563	0.207	2.0416e-56	Mac-D	KMO
898	1.69969e-75	0.700304	0.644	0.224	5.56446e-71	Mac-D	RALGDS
895	1.74188e-78	0.697293	0.945	0.439	5.70256e-74	Mac-D	WSB1
892	1.6414e-79	0.696618	0.862	0.415	5.37361e-75	Mac-D	INSIG1
915	8.56619e-51	0.696288	0.642	0.299	2.8044e-46	Mac-D	PTGS2
917	4.21692e-20	-0.805469	0.131	0.325	1.38053e-15	Mac-D	FCN1
885	5.97345e-85	-0.829482	0.782	0.824	1.95559e-80	Mac-D	S100A9
918	2.01538e-17	-0.829789	0.227	0.379	6.59794e-13	Mac-D	CD52
914	4.66843e-51	-0.940845	0.561	0.694	1.52835e-46	Mac-D	S100A8

## Sheet: Mac-E
	p_val	avg_logFC	pct.1	pct.2	p_val_adj	cluster	gene
919	0	2.06024	0.894	0.051	0	Mac-E	FCER1A
922	8.07245e-252	1.85178	0.845	0.065	2.64276e-247	Mac-E	CCR7
920	3.54926e-274	1.67385	0.633	0.017	1.16196e-269	Mac-E	CCL22
921	3.81841e-263	1.60344	0.739	0.038	1.25007e-258	Mac-E	CD1C
938	1.04421e-120	1.39749	0.923	0.259	3.41852e-116	Mac-E	C15orf48
946	1.60667e-107	1.33016	0.812	0.191	5.25992e-103	Mac-E	PLAU
929	6.0363e-165	1.30582	0.807	0.115	1.97616e-160	Mac-E	RHOF
933	2.92403e-144	1.2887	0.773	0.121	9.57268e-140	Mac-E	AGPAT9
937	2.94611e-130	1.27305	0.691	0.102	9.64498e-126	Mac-E	DUSP4
958	9.52734e-93	1.26463	0.802	0.219	3.11906e-88	Mac-E	MIR155HG
925	1.79573e-182	1.23995	0.72	0.069	5.87887e-178	Mac-E	PKIB
924	1.24579e-183	1.23228	0.725	0.071	4.07847e-179	Mac-E	TMEM120B
935	5.39411e-139	1.2297	0.831	0.127	1.76592e-134	Mac-E	XIST
936	7.26049e-137	1.19931	0.754	0.11	2.37694e-132	Mac-E	PDGFB
945	1.35151e-107	1.17946	0.937	0.315	4.42456e-103	Mac-E	GRASP
950	3.83177e-103	1.13397	0.957	0.353	1.25445e-98	Mac-E	NR4A3
930	8.04443e-163	1.12942	0.715	0.081	2.63358e-158	Mac-E	IL4I1
954	1.67198e-96	1.12558	0.826	0.223	5.47372e-92	Mac-E	CLEC10A
965	1.80214e-85	1.10662	0.884	0.3	5.89983e-81	Mac-E	RGCC
947	2.41912e-107	1.10401	0.604	0.093	7.91972e-103	Mac-E	NRARP
959	2.27853e-90	1.06607	0.865	0.284	7.45946e-86	Mac-E	DUSP5
948	2.36881e-104	1.06396	0.783	0.186	7.75502e-100	Mac-E	ARID3A
968	4.56273e-84	1.05141	0.845	0.328	1.49375e-79	Mac-E	STK4
926	9.1863e-180	1.04157	0.638	0.049	3.00741e-175	Mac-E	MCOLN2
940	3.69684e-115	1.03723	0.947	0.248	1.21027e-110	Mac-E	HLA.DMB
932	6.67336e-145	1.03443	0.556	0.047	2.18472e-140	Mac-E	PADI2
951	3.9057e-102	1.03278	0.792	0.187	1.27865e-97	Mac-E	ATF5
962	2.20337e-88	1.02866	0.884	0.296	7.2134e-84	Mac-E	TRAF1
970	1.20709e-82	1.01723	0.845	0.272	3.95176e-78	Mac-E	REV3L
960	8.99086e-90	1.01415	1	0.471	2.94343e-85	Mac-E	HLA.DQA1
978	2.84901e-77	1.00956	0.923	0.388	9.3271e-73	Mac-E	TNFAIP8
977	5.05454e-78	0.997676	0.889	0.346	1.65476e-73	Mac-E	MIR29A
967	1.61848e-84	0.99704	0.797	0.226	5.29858e-80	Mac-E	ATP1B1
989	6.85913e-71	0.98431	0.831	0.303	2.24554e-66	Mac-E	VEGFA
993	5.90656e-69	0.984224	0.488	0.085	1.93369e-64	Mac-E	TCHH
963	5.29774e-87	0.976428	0.894	0.304	1.73438e-82	Mac-E	NFKBID
944	5.32103e-108	0.974899	0.734	0.141	1.742e-103	Mac-E	IL1R1
987	3.67106e-73	0.972762	0.734	0.221	1.20183e-68	Mac-E	CD40
1016	2.43527e-59	0.970906	0.865	0.395	7.97258e-55	Mac-E	TNF
931	1.25214e-153	0.960787	0.396	0.014	4.09927e-149	Mac-E	SPIB
964	1.1562e-86	0.96042	1	0.538	3.78516e-82	Mac-E	HLA.DQB1
923	2.72564e-206	0.956828	0.556	0.023	8.9232e-202	Mac-E	RP11.404O13.5
942	4.55521e-113	0.946247	0.551	0.062	1.49128e-108	Mac-E	CST7
971	7.08262e-82	0.941596	0.812	0.243	2.31871e-77	Mac-E	ETV3
998	8.56403e-67	0.941013	0.812	0.261	2.80369e-62	Mac-E	IL1R2
949	3.45791e-104	0.936038	0.676	0.116	1.13205e-99	Mac-E	CCND2
955	4.45006e-95	0.933355	0.845	0.226	1.45686e-90	Mac-E	EDEM1
927	1.49101e-173	0.932938	0.43	0.013	4.88126e-169	Mac-E	CD1E
952	4.62578e-99	0.931225	0.739	0.157	1.51439e-94	Mac-E	SRGAP1
972	7.49628e-82	0.928241	0.884	0.318	2.45413e-77	Mac-E	CSF2RA
1003	1.16092e-63	0.92743	0.652	0.188	3.80062e-59	Mac-E	LDLRAD4
934	1.2607e-140	0.924836	0.493	0.035	4.12727e-136	Mac-E	IRF4
981	5.55812e-76	0.922783	0.932	0.459	1.81962e-71	Mac-E	EZR
999	9.9648e-67	0.916321	0.507	0.101	3.26227e-62	Mac-E	TNFSF9
992	3.00857e-69	0.913599	0.522	0.101	9.84946e-65	Mac-E	MMP9
983	2.72534e-75	0.913208	0.826	0.251	8.92221e-71	Mac-E	CXCR4
976	2.22393e-78	0.912946	0.87	0.309	7.2807e-74	Mac-E	RAPGEF1
966	9.27662e-85	0.900016	0.908	0.334	3.03698e-80	Mac-E	LSP1
956	4.0379e-94	0.898399	0.459	0.056	1.32193e-89	Mac-E	GPR157
953	1.44571e-96	0.897284	0.633	0.116	4.73297e-92	Mac-E	TRIP10
1009	2.29875e-61	0.891578	0.671	0.21	7.52564e-57	Mac-E	TPRA1
928	6.81387e-173	0.878143	0.512	0.025	2.23073e-168	Mac-E	PLD4
994	6.47977e-69	0.876655	0.705	0.208	2.12135e-64	Mac-E	PTGER4
985	1.63238e-73	0.874134	0.575	0.121	5.34409e-69	Mac-E	RUNX3
997	3.21057e-67	0.871814	0.894	0.412	1.05108e-62	Mac-E	MAFF
991	2.93545e-70	0.87169	0.952	0.451	9.61007e-66	Mac-E	INSIG1
1059	1.50191e-37	0.864915	0.676	0.285	4.91696e-33	Mac-E	IL1A
979	2.71038e-76	0.863936	0.845	0.295	8.87325e-72	Mac-E	AMICA1
974	7.9503e-81	0.863932	1	0.512	2.60277e-76	Mac-E	REL
943	1.73385e-109	0.863925	0.531	0.065	5.67627e-105	Mac-E	BCL2
986	2.01323e-73	0.861703	0.99	0.531	6.5909e-69	Mac-E	GPR183
975	1.7918e-78	0.860153	0.792	0.237	5.866e-74	Mac-E	CHST11
1046	1.23014e-48	0.852477	0.643	0.2	4.02722e-44	Mac-E	CCL3L1
1029	1.786e-54	0.851692	0.657	0.219	5.847e-50	Mac-E	RAB11FIP1
980	3.44659e-76	0.847543	0.758	0.224	1.12834e-71	Mac-E	MALT1
1015	2.2099e-59	0.847114	0.739	0.22	7.23477e-55	Mac-E	AREG
969	9.48126e-83	0.840669	0.686	0.147	3.10398e-78	Mac-E	CD9
1002	8.41431e-64	0.838943	0.618	0.167	2.75468e-59	Mac-E	SATB1
982	1.26408e-75	0.836321	0.995	0.479	4.13835e-71	Mac-E	NFKB1
1028	1.39645e-54	0.83486	0.889	0.391	4.5717e-50	Mac-E	LMNA
1020	3.67625e-58	0.828693	0.783	0.278	1.20353e-53	Mac-E	GPR132
1041	4.19918e-51	0.82647	0.749	0.303	1.37473e-46	Mac-E	MAP4K4
1030	1.99801e-54	0.821744	0.865	0.379	6.54108e-50	Mac-E	BIRC3
1017	2.50801e-59	0.821668	0.918	0.405	8.21071e-55	Mac-E	BASP1
1014	1.92772e-59	0.817914	0.691	0.218	6.31098e-55	Mac-E	UGCG
996	1.56278e-68	0.808011	0.604	0.141	5.11624e-64	Mac-E	RASGRP3
1056	1.1227e-38	0.805958	0.44	0.123	3.67549e-34	Mac-E	TNFSF14
1013	3.58217e-60	0.80232	0.589	0.156	1.17273e-55	Mac-E	KCNN4
1011	1.5358e-60	0.801215	0.908	0.405	5.02792e-56	Mac-E	OGFRL1
1010	1.08437e-60	0.800948	0.86	0.27	3.55002e-56	Mac-E	RGS1
988	4.37965e-71	0.797843	0.792	0.25	1.43381e-66	Mac-E	PDE4A
1036	9.53635e-53	0.796241	0.667	0.228	3.12201e-48	Mac-E	RANBP2
1004	2.56952e-63	0.79624	0.807	0.274	8.41211e-59	Mac-E	RP11.138A9.2
1022	3.15578e-57	0.794055	0.884	0.379	1.03314e-52	Mac-E	SGK1
1008	1.73043e-61	0.785804	0.812	0.314	5.66508e-57	Mac-E	MBP
1007	2.63825e-62	0.785774	0.928	0.422	8.6371e-58	Mac-E	SPAG9
1040	3.59538e-51	0.782465	0.754	0.299	1.17706e-46	Mac-E	CDC42EP3
1068	3.2859e-27	0.779156	0.271	0.065	1.07574e-22	Mac-E	LY6K
1055	1.05149e-38	0.771859	0.464	0.134	3.44236e-34	Mac-E	RPPH1
1051	8.92802e-43	0.76806	0.691	0.264	2.92286e-38	Mac-E	RBBP8
1006	9.14917e-63	0.764903	0.976	0.475	2.99526e-58	Mac-E	SERPINB9
1054	8.45399e-41	0.762505	0.831	0.379	2.76767e-36	Mac-E	G0S2
1012	1.59892e-60	0.762267	0.705	0.232	5.23455e-56	Mac-E	RALA
1001	8.34121e-65	0.757703	0.952	0.498	2.73075e-60	Mac-E	CFLAR
1005	3.1581e-63	0.750995	0.923	0.384	1.0339e-58	Mac-E	MAT2A
961	1.81487e-89	0.746573	0.493	0.066	5.94151e-85	Mac-E	C10orf128
1019	8.57216e-59	0.744701	0.845	0.326	2.80635e-54	Mac-E	PHACTR1
941	2.4542e-113	0.741738	0.314	0.013	8.03456e-109	Mac-E	CD70
939	4.12168e-119	0.738004	0.517	0.053	1.34936e-114	Mac-E	NDRG2
984	8.71967e-74	0.736133	0.662	0.162	2.85464e-69	Mac-E	EIF2AK4
1021	5.21e-58	0.734182	0.913	0.422	1.70565e-53	Mac-E	CHD2
973	2.39641e-81	0.732238	0.628	0.125	7.84535e-77	Mac-E	ADAM28
1045	7.39165e-49	0.727395	0.599	0.187	2.41988e-44	Mac-E	DENND4A
1000	1.63308e-66	0.726508	0.56	0.122	5.34637e-62	Mac-E	TCOF1
1025	1.38084e-55	0.725025	0.551	0.143	4.52058e-51	Mac-E	SLC25A19
990	8.34732e-71	0.72202	0.512	0.096	2.73274e-66	Mac-E	BANP
1024	1.21441e-55	0.720715	0.85	0.358	3.97574e-51	Mac-E	FNBP1
1018	5.2213e-59	0.718284	0.628	0.173	1.70935e-54	Mac-E	CLN8
1032	2.65904e-53	0.718177	0.778	0.297	8.70517e-49	Mac-E	LPXN
1026	6.64803e-55	0.713938	0.628	0.181	2.17643e-50	Mac-E	CD84
1031	8.77752e-54	0.71052	0.942	0.49	2.87358e-49	Mac-E	HLA.DMA
1027	8.05961e-55	0.708204	0.575	0.152	2.63856e-50	Mac-E	CASC7
1038	1.04173e-51	0.7077	0.797	0.314	3.41042e-47	Mac-E	HEXIM1
1035	7.8887e-53	0.703838	0.662	0.217	2.5826e-48	Mac-E	CEP170
1034	5.13079e-53	0.703791	0.865	0.358	1.67972e-48	Mac-E	FCGR2B
1037	3.90359e-52	0.702511	0.435	0.093	1.27796e-47	Mac-E	TRAF4
1048	5.67958e-46	0.699316	0.686	0.253	1.85938e-41	Mac-E	INTS6
1058	3.28654e-38	0.699007	0.556	0.183	1.07595e-33	Mac-E	SLAMF7
1052	2.31053e-42	0.698472	0.744	0.326	7.56421e-38	Mac-E	BCAS2
1039	1.59317e-51	0.695889	0.908	0.42	5.21572e-47	Mac-E	KMT2E
1042	9.43052e-51	0.694798	0.585	0.172	3.08736e-46	Mac-E	SPHK1
1117	1.94925e-11	-0.69798	0.599	0.652	6.38146e-07	Mac-E	LAMP1
1126	6.61741e-09	-0.708154	0.203	0.36	0.000216641	Mac-E	LILRA5
1091	1.05779e-16	-0.716725	0.024	0.292	3.46301e-12	Mac-E	DMXL2
1097	1.99619e-15	-0.716745	0.541	0.629	6.53511e-11	Mac-E	FPR1
1094	3.94591e-16	-0.720312	0.691	0.732	1.29181e-11	Mac-E	AP2S1
1113	1.93488e-12	-0.722022	0.266	0.475	6.33441e-08	Mac-E	C3AR1
1106	1.78623e-13	-0.725944	0.058	0.292	5.84777e-09	Mac-E	TCN2
1111	1.1919e-12	-0.726061	0.676	0.7	3.90206e-08	Mac-E	CLTA
1120	1.78011e-10	-0.728401	0.382	0.493	5.82773e-06	Mac-E	HCK
1128	1.57773e-08	-0.736544	0.3	0.446	0.000516516	Mac-E	NCF4
1119	1.51004e-10	-0.75287	0.556	0.612	4.94358e-06	Mac-E	MANF
1109	1.13088e-12	-0.755423	0.29	0.487	3.70227e-08	Mac-E	CLEC4E
1110	1.13428e-12	-0.756358	0.522	0.615	3.71342e-08	Mac-E	P4HB
1122	6.1446e-10	-0.757838	0.246	0.422	2.01162e-05	Mac-E	HNMT
1115	5.94581e-12	-0.760381	0.072	0.289	1.94654e-07	Mac-E	HOMER3
1125	1.54091e-09	-0.766743	0.087	0.265	5.04463e-05	Mac-E	GIMAP4
1107	4.35009e-13	-0.787754	0.193	0.416	1.42413e-08	Mac-E	AGTRAP
1083	3.36069e-20	-0.788348	0.691	0.721	1.10022e-15	Mac-E	CTSC
1072	9.63461e-26	-0.795421	0.633	0.726	3.15418e-21	Mac-E	ACSL1
1124	1.1543e-09	-0.803191	0.488	0.554	3.77894e-05	Mac-E	SNX6
1088	3.94198e-18	-0.803408	0.599	0.678	1.29053e-13	Mac-E	HSBP1
1114	5.91302e-12	-0.803603	0.449	0.572	1.9358e-07	Mac-E	SDF2L1
1121	5.98011e-10	-0.806441	0.193	0.373	1.95777e-05	Mac-E	BLVRA
1105	1.32167e-13	-0.81179	0.493	0.587	4.32688e-09	Mac-E	GCA
1127	1.18783e-08	-0.837641	0.145	0.315	0.000388872	Mac-E	MAF
1098	2.28929e-15	-0.841809	0.357	0.565	7.49467e-11	Mac-E	HMOX1
1108	8.75571e-13	-0.857188	0.338	0.511	2.86644e-08	Mac-E	CALM3
1070	1.91336e-26	-0.859768	0.768	0.837	6.26395e-22	Mac-E	TUBA1B
1043	3.28245e-50	-0.869034	0.734	0.888	1.07461e-45	Mac-E	GLUL
1103	1.028e-14	-0.873343	0.019	0.257	3.36546e-10	Mac-E	DNAAF1
1093	2.6306e-16	-0.878534	0.082	0.344	8.61205e-12	Mac-E	CD300E
1078	1.97149e-21	-0.879359	0.657	0.738	6.45427e-17	Mac-E	BLVRB
1081	6.20284e-21	-0.887135	0.594	0.701	2.03068e-16	Mac-E	PDIA6
1123	7.77271e-10	-0.900008	0.357	0.498	2.54463e-05	Mac-E	PLD3
1092	1.22688e-16	-0.915534	0.087	0.361	4.01655e-12	Mac-E	DDX3Y
1082	1.90189e-20	-0.917504	0.053	0.365	6.2264e-16	Mac-E	LDLR
1104	2.9012e-14	-0.920063	0.034	0.274	9.49796e-10	Mac-E	SLC1A3
1101	7.11675e-15	-0.92592	0.101	0.348	2.32988e-10	Mac-E	RP11.290F20.3
1074	1.25419e-24	-0.930755	0.633	0.732	4.10597e-20	Mac-E	MS4A4A
1087	6.79111e-20	-0.935296	0.01	0.315	2.22327e-15	Mac-E	NPL
1112	1.61229e-12	-0.942699	0.063	0.279	5.27831e-08	Mac-E	IDH1
1084	4.58173e-20	-0.952377	0.097	0.407	1.49997e-15	Mac-E	PYGL
1079	2.85335e-21	-1.01079	0.329	0.562	9.34128e-17	Mac-E	AGFG1
1090	6.26188e-17	-1.01147	0.246	0.483	2.05002e-12	Mac-E	CNIH4
1116	1.50648e-11	-1.02941	0.077	0.282	4.93191e-07	Mac-E	GPR34
1065	5.09046e-31	-1.04092	0.594	0.739	1.66651e-26	Mac-E	CD163
1118	2.89309e-11	-1.05304	0.164	0.361	9.47141e-07	Mac-E	PDK4
1095	7.47429e-16	-1.07353	0.13	0.389	2.44693e-11	Mac-E	STAB1
1086	6.11158e-20	-1.08059	0.01	0.313	2.00081e-15	Mac-E	RBP7
1102	9.03309e-15	-1.08762	0.068	0.311	2.95725e-10	Mac-E	FCN1
1099	6.25994e-15	-1.11206	0.058	0.308	2.04938e-10	Mac-E	TNFAIP6
1066	2.8358e-29	-1.13351	0.121	0.52	9.28384e-25	Mac-E	SLC11A1
1069	1.80546e-26	-1.14368	0.106	0.503	5.91073e-22	Mac-E	RPS4Y1
1060	5.96267e-36	-1.14733	0.372	0.688	1.95206e-31	Mac-E	FCGR3A
1073	8.40813e-25	-1.14854	0.251	0.56	2.75265e-20	Mac-E	THBS1
1077	8.80192e-22	-1.15141	0.401	0.625	2.88157e-17	Mac-E	TXNIP
1100	6.38044e-15	-1.15493	0.14	0.386	2.08883e-10	Mac-E	DAB2
1096	1.3474e-15	-1.15665	0.092	0.354	4.41111e-11	Mac-E	MT1X
1085	6.02231e-20	-1.15797	0.063	0.376	1.97158e-15	Mac-E	VCAN
1089	4.51014e-17	-1.17386	0.527	0.615	1.47653e-12	Mac-E	F13A1
1076	5.33328e-22	-1.18651	0.029	0.357	1.74601e-17	Mac-E	AQP9
1050	1.54906e-43	-1.18834	0.56	0.78	5.07131e-39	Mac-E	C1QA
1071	9.3155e-26	-1.20615	0.087	0.451	3.04971e-21	Mac-E	FCGR1A
1080	2.86683e-21	-1.24572	0.271	0.54	9.38543e-17	Mac-E	PDIA4
1063	2.34265e-32	-1.26685	0.15	0.556	7.66936e-28	Mac-E	SLA
1061	1.36438e-35	-1.29758	0.329	0.656	4.4667e-31	Mac-E	CFD
1044	5.68487e-50	-1.31488	0.425	0.77	1.86111e-45	Mac-E	CTSD
1049	1.88927e-44	-1.35316	0.459	0.745	6.18511e-40	Mac-E	C1QB
1075	2.12203e-23	-1.36502	0.058	0.406	6.94711e-19	Mac-E	TMEM176A
1023	8.35614e-56	-1.40405	0.314	0.792	2.73563e-51	Mac-E	CD14
1064	2.10511e-31	-1.53789	0.097	0.513	6.89172e-27	Mac-E	TMEM176B
1047	4.37543e-48	-1.57525	0.329	0.721	1.43243e-43	Mac-E	C1QC
1067	8.36103e-29	-1.67173	0.097	0.484	2.73723e-24	Mac-E	FOLR2
1062	4.14694e-35	-1.88236	0.014	0.477	1.35763e-30	Mac-E	LYVE1
1053	4.69438e-42	-2.09103	0.092	0.587	1.53685e-37	Mac-E	PLTP
1057	1.5643e-38	-2.12944	0.048	0.531	5.12122e-34	Mac-E	SEPP1
1033	2.83516e-53	-2.35666	0.082	0.657	9.28174e-49	Mac-E	RNASE1
995	1.43693e-68	-2.41697	0.019	0.725	4.70423e-64	Mac-E	S100A8
957	2.49006e-93	-2.47783	0.111	0.875	8.15197e-89	Mac-E	S100A9
